# Supplementary material
Source: PubMed Central journal article supplement (PMC4161160)

# Design, Synthesis, and Biological Evaluation of Stable Colchicine Binding Site Tubulin Inhibitors as Potential Anticancer Agents

*Yan Lu,<sup>†</sup> Jianjun Chen,<sup>†</sup> Jin Wang,<sup>†</sup> Chien-Ming Li,<sup>‡</sup> Sunjoo Ahn,<sup>‡</sup> Christina M. Barrett,<sup>‡</sup> James T. Dalton,<sup>‡</sup> Wei Li<sup>\*,†</sup>, Duane D.  
Miller<sup>\*,†</sup>*

<sup>†</sup> Department of Pharmaceutical Sciences, University of Tennessee, Health Science Center, Memphis, TN 38163

<sup>‡</sup> GTx Inc, Preclinical R&D, Memphis, TN, 38163

\* Corresponding authors: Duane D. Miller, E-mail: [dmiller@uthsc.edu](mailto:dmiller@uthsc.edu). Phone: (901)448-6026. Fax: (901)448-3446. Wei Li, E-mail: [wli@uthsc.edu](mailto:wli@uthsc.edu). Phone: 901-448-7532. Fax: 901-448-6828.

Table of contents

**S1** Mass and chromatograph spectrum of compounds **15**, **18**, **4**, **7**, and their metabolites.

# Mass spectrum of Compound 15

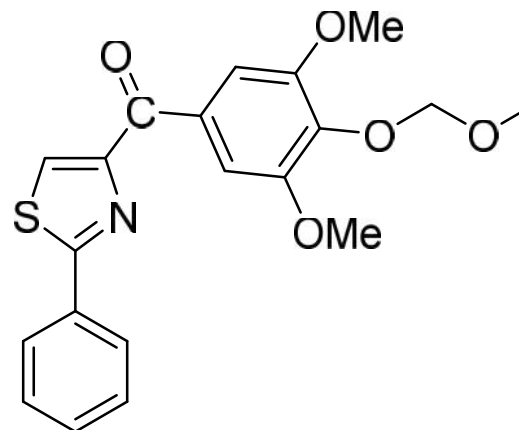

Chemical Formula:  $C_{20}H_{19}NO_5S$

Exact Mass: 385.0984

Molecular Weight: 385.4336

Calculated 386.1062 [M+1]<sup>+</sup>, found 386.1062

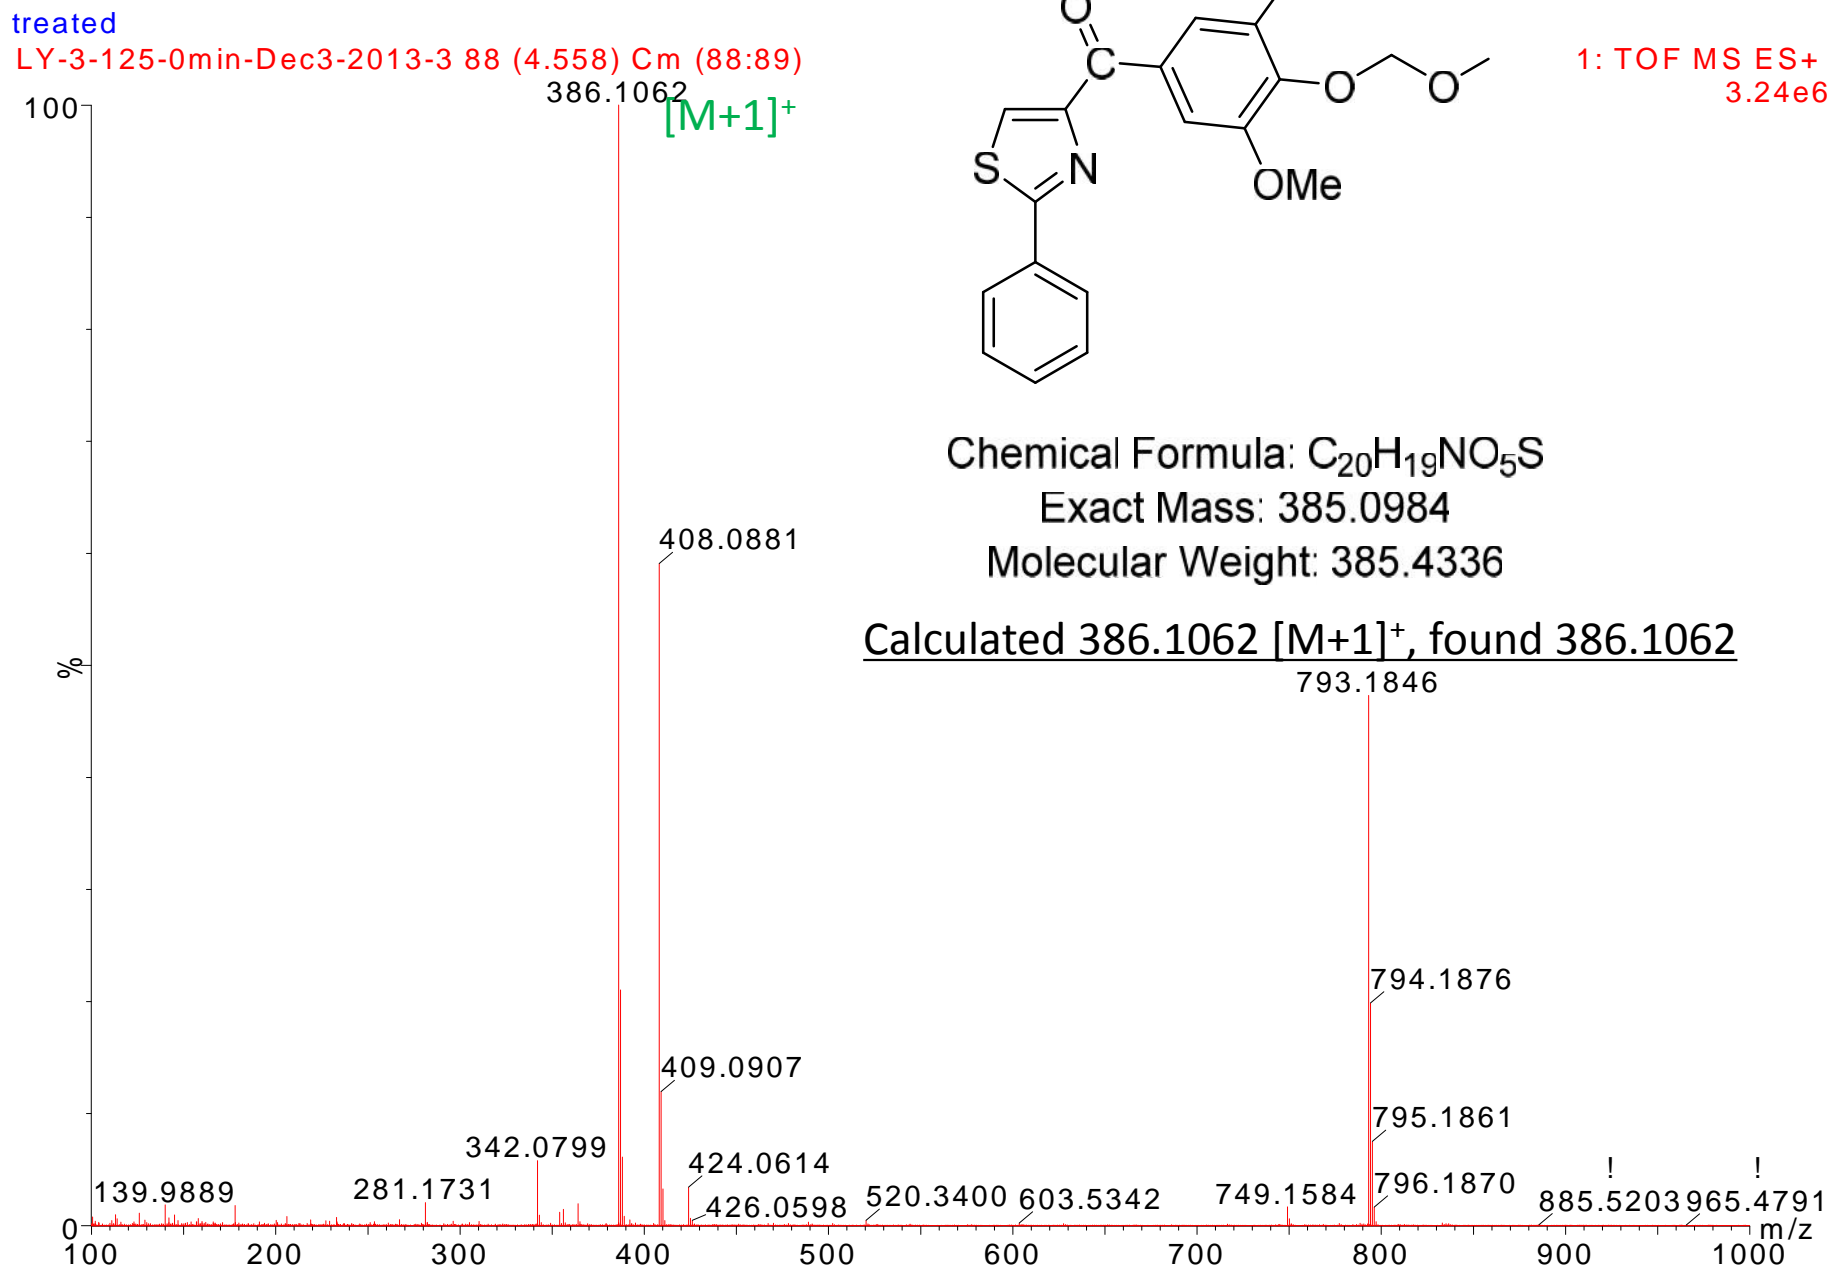

# Chromatogram of 15 (extracted at 386.1062)

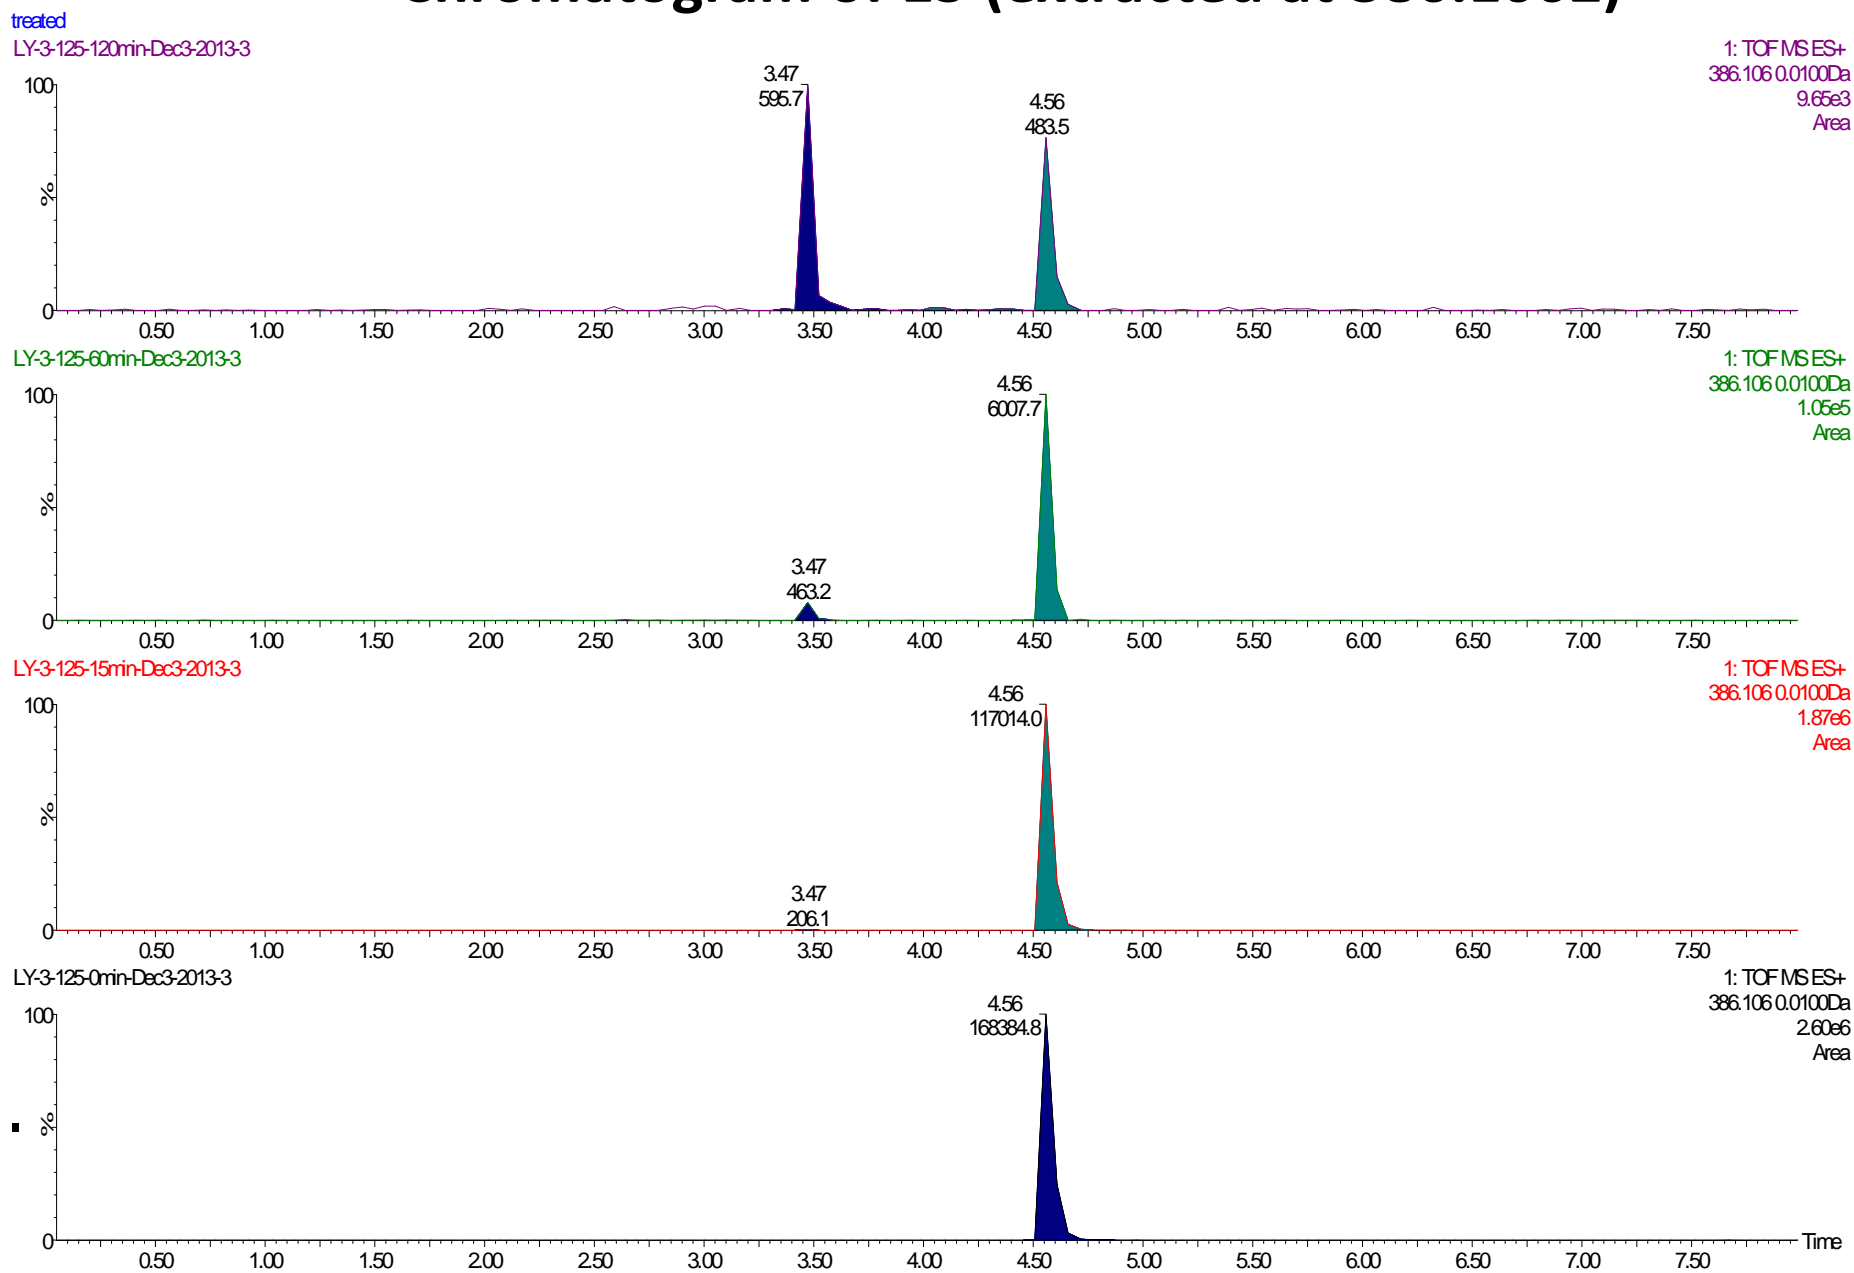

treated

LY-3-125-120min-Dec3-2013-3 72 (3.725) Cm (71:72)

# Mass spectrum of M1

1: TOF MS ES+  
6.57e4

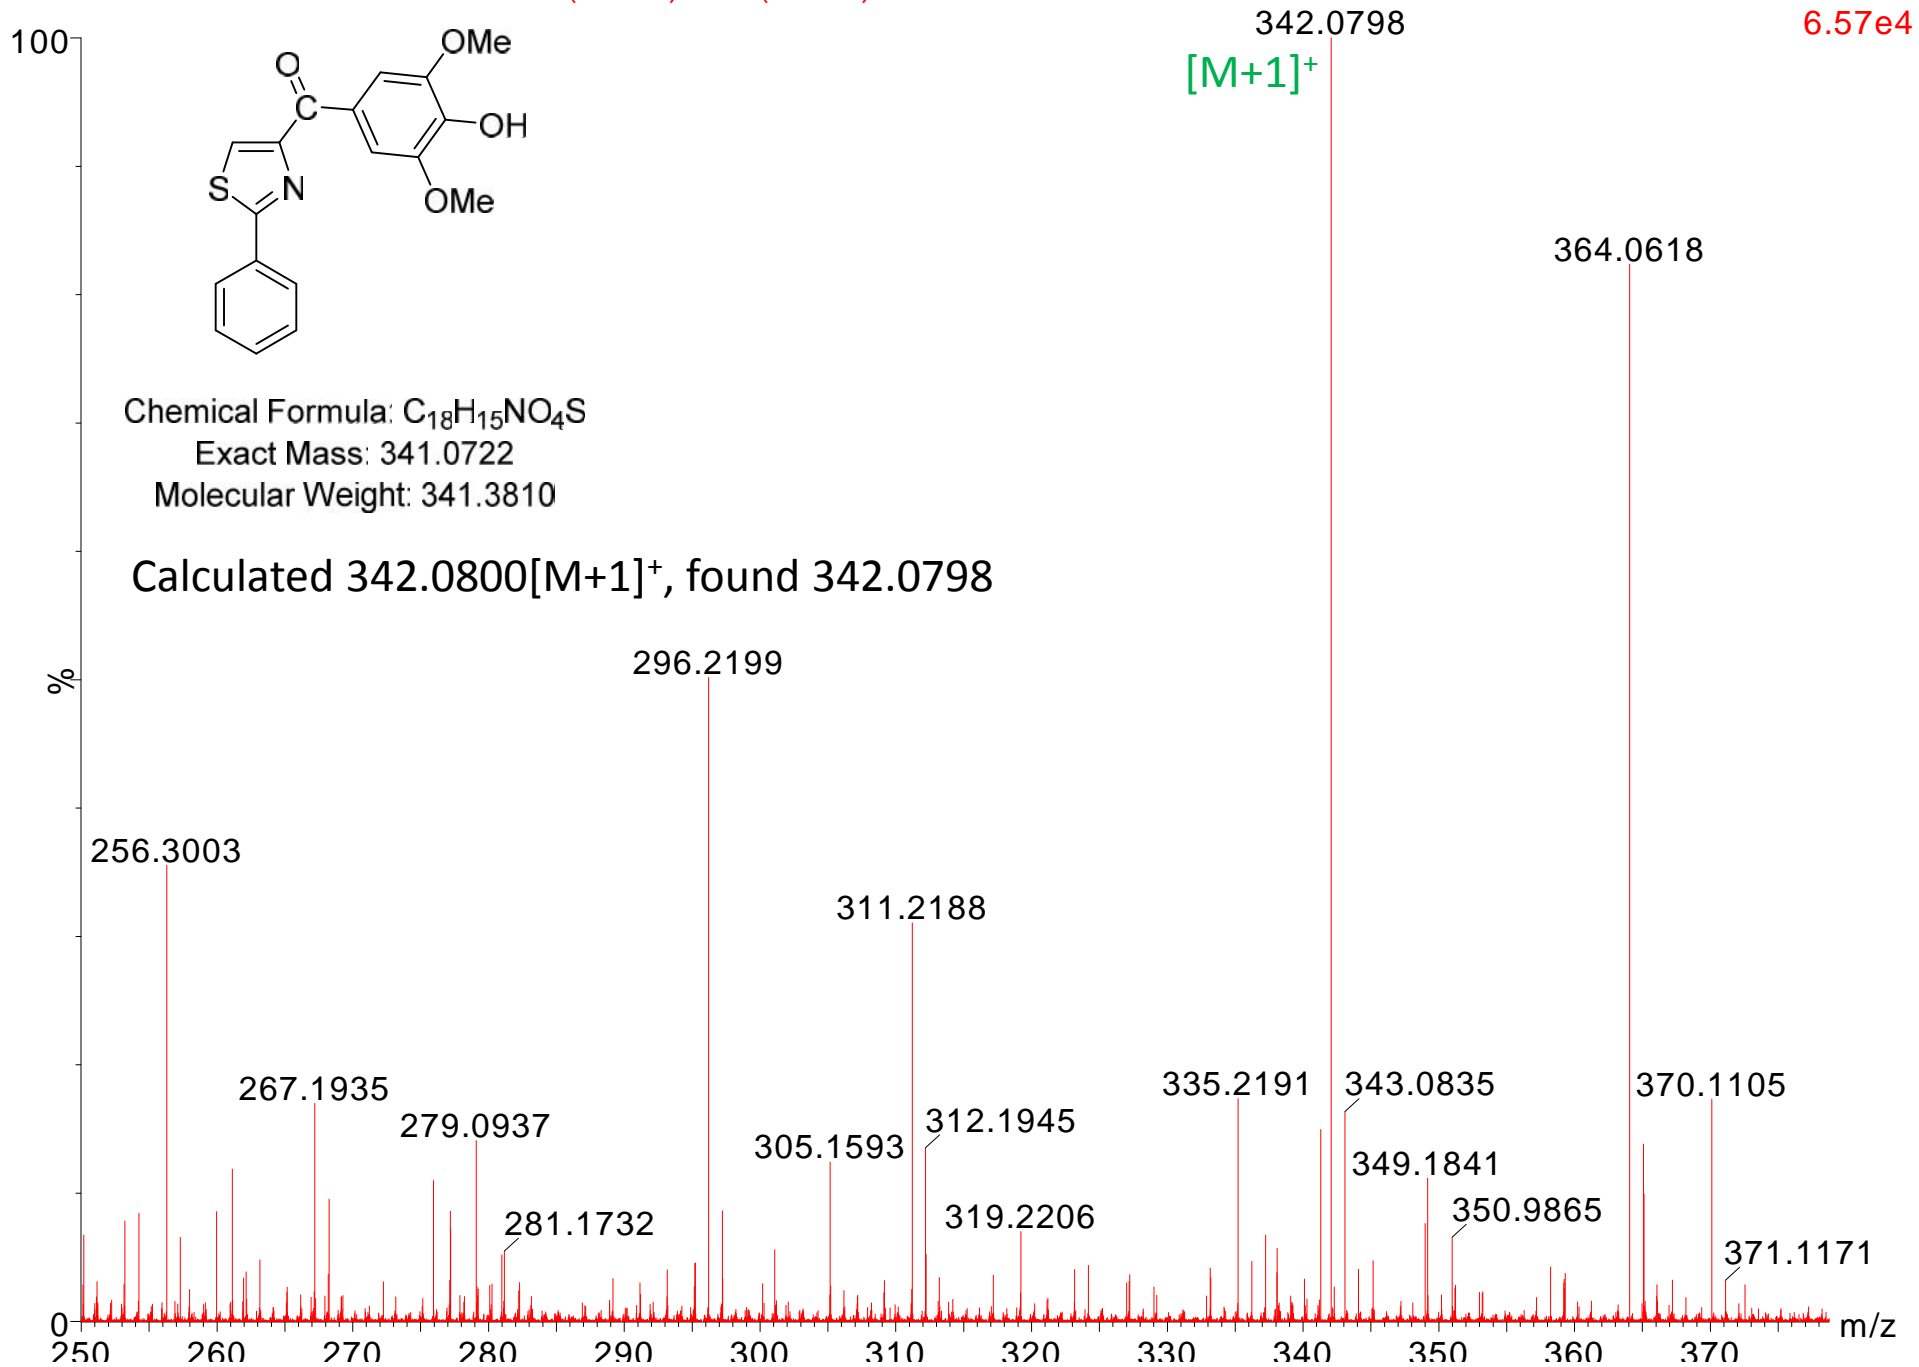

# Chromatogram of M1 (extracted at 342.0800)

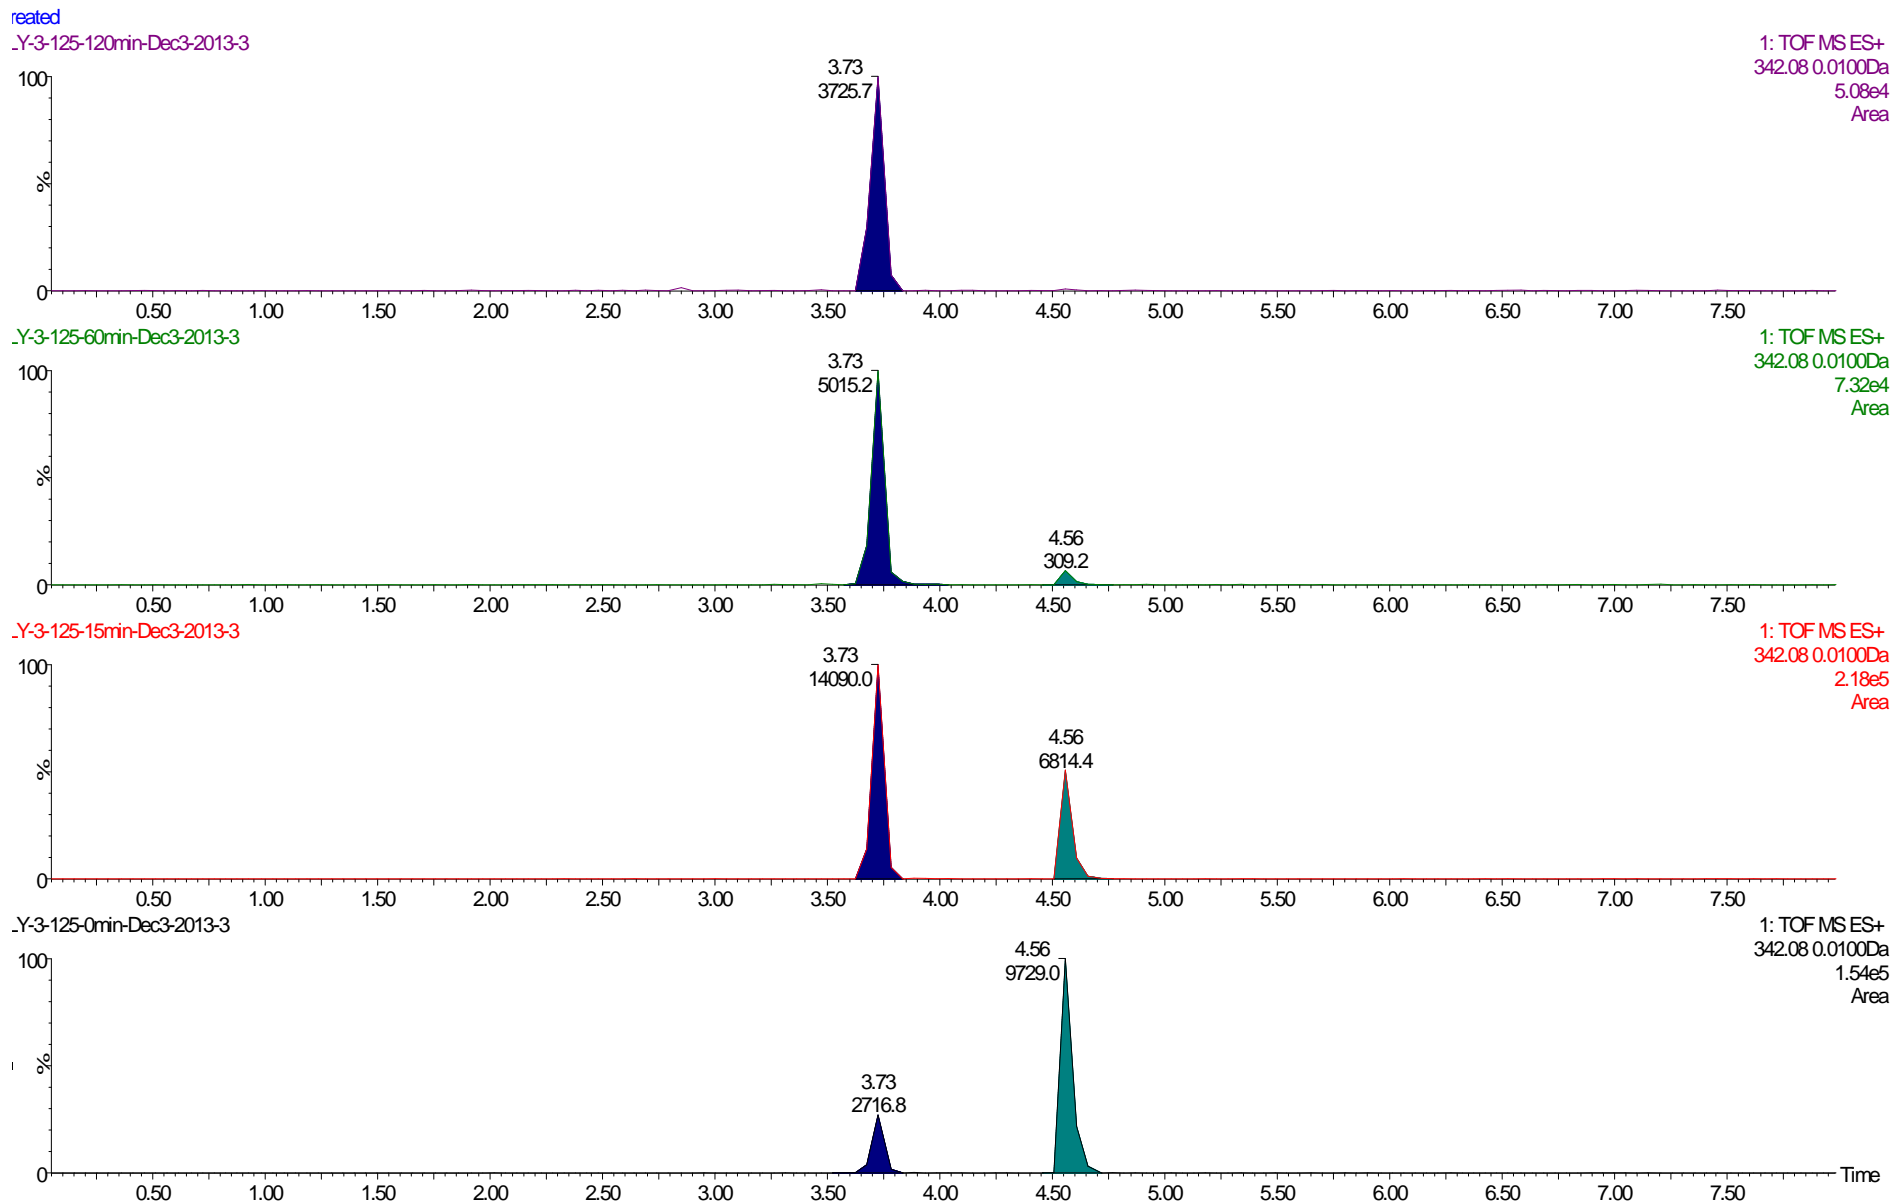

# Mass spectrum of M2

treated

LY-3-125-120min-Dec3-2013-3 60 (3.103) Cm (60:61)

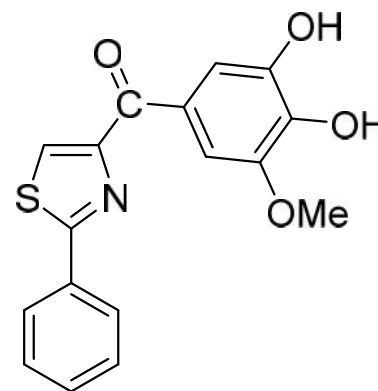

1: TOF MS ES+  
8.65e3

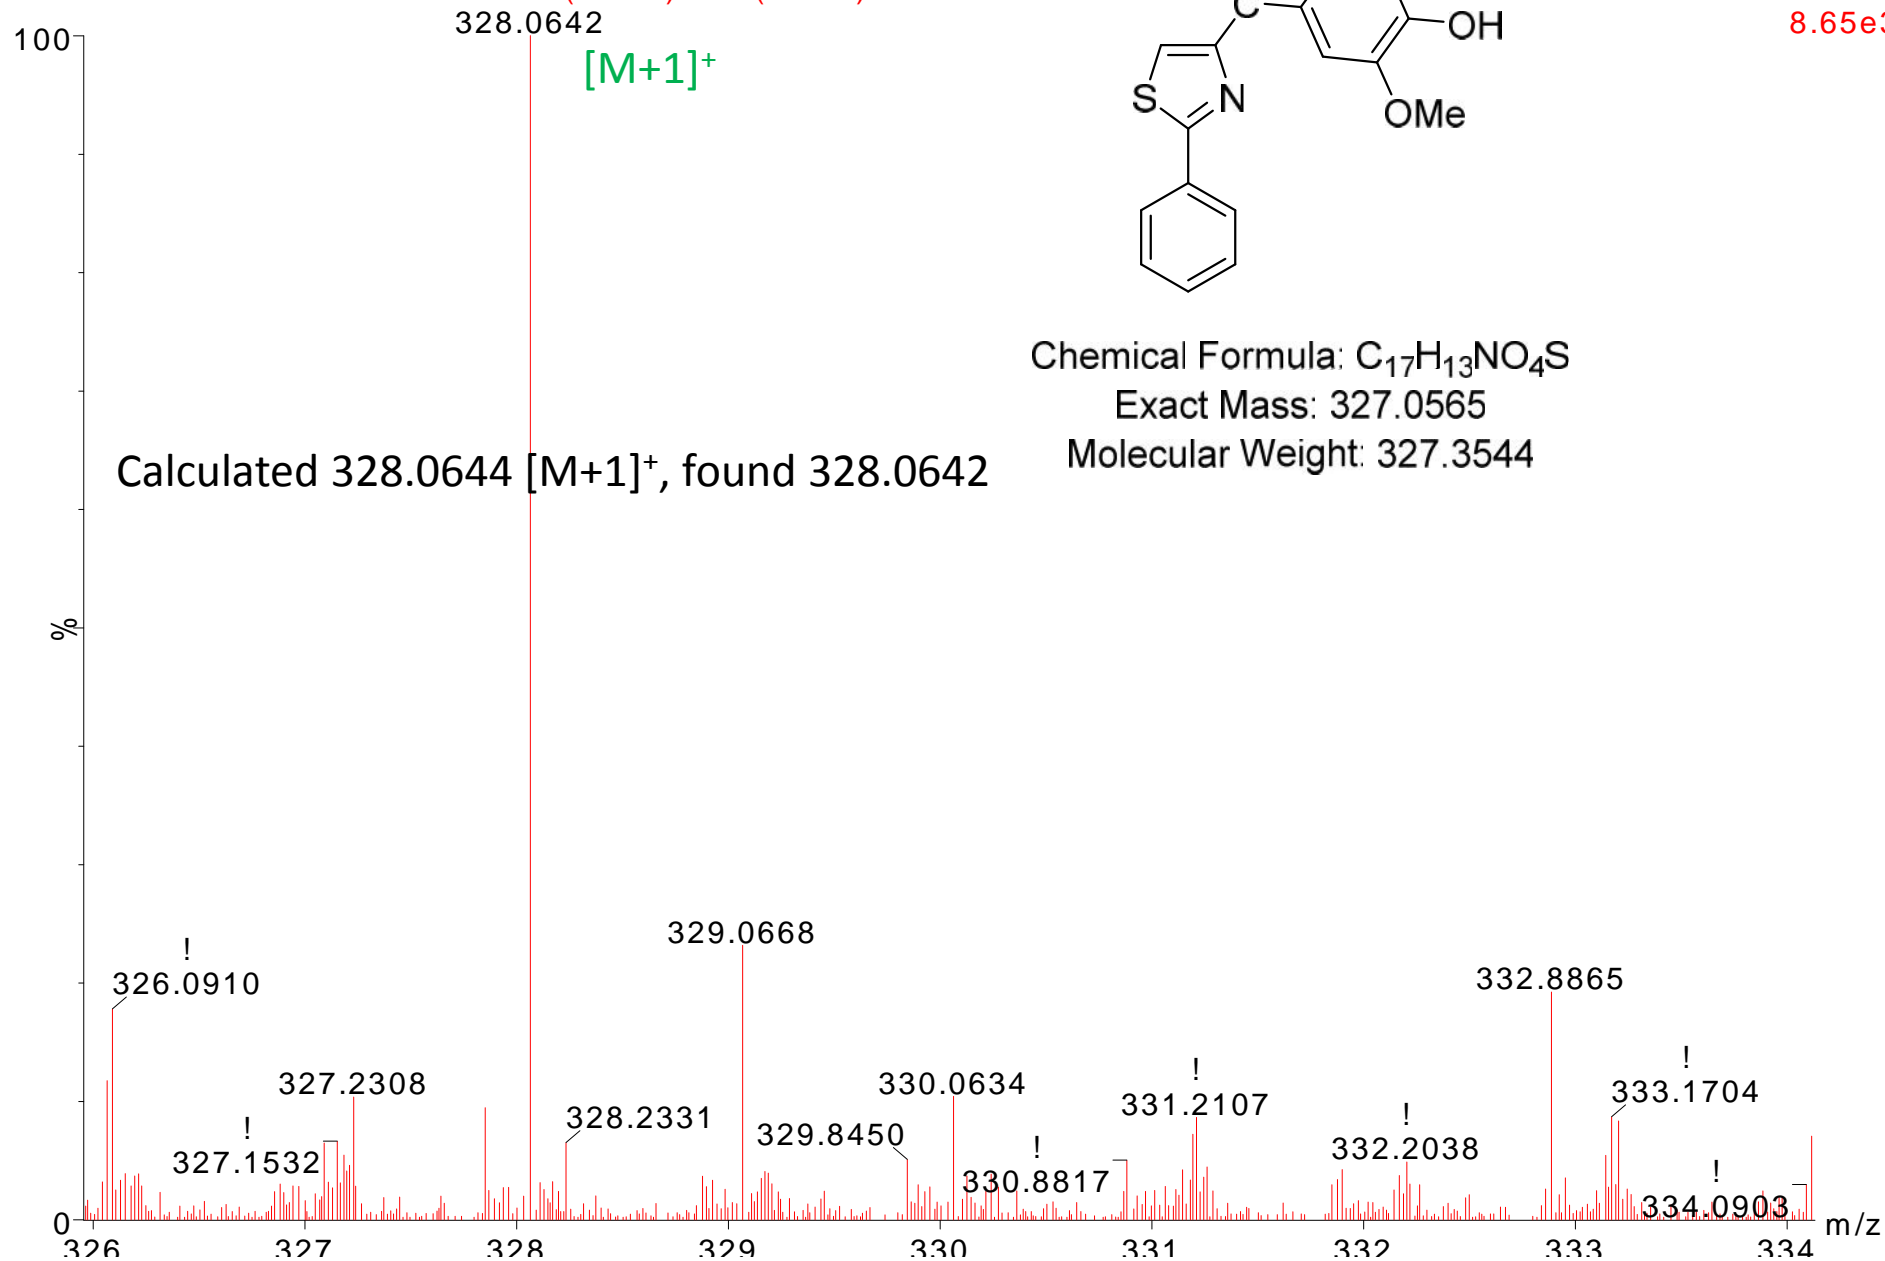

Calculated 328.0644 [M+1]<sup>+</sup>, found 328.0642

Chemical Formula: C<sub>17</sub>H<sub>13</sub>NO<sub>4</sub>S

Exact Mass: 327.0565

Molecular Weight: 327.3544

# Chromatogram of M2 (extracted at 328.0644)

treated

LY-3-125-120min-Dec3-2013-3

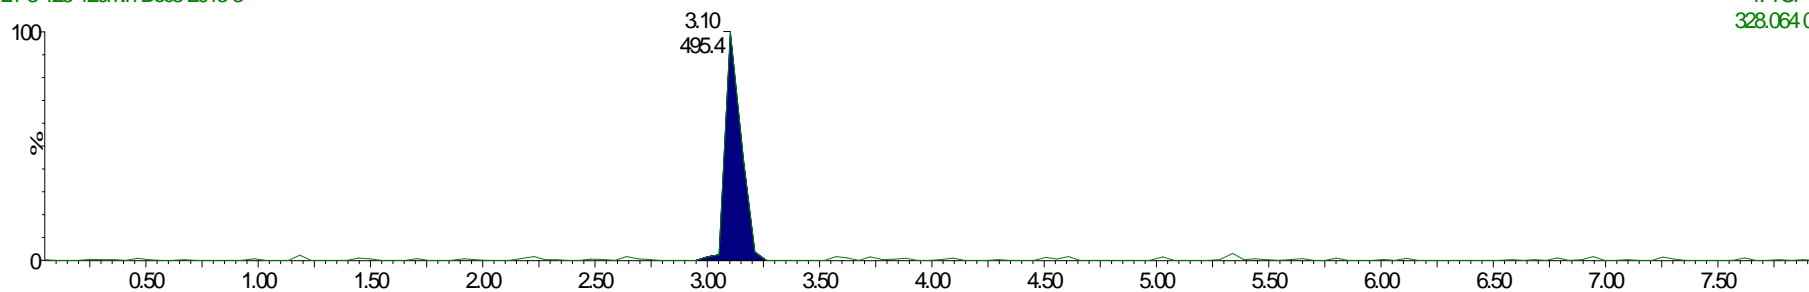

1: TOF MS ES+  
328.064 0.0100Da  
6.02e3  
Area

LY-3-125-60min-Dec3-2013-3

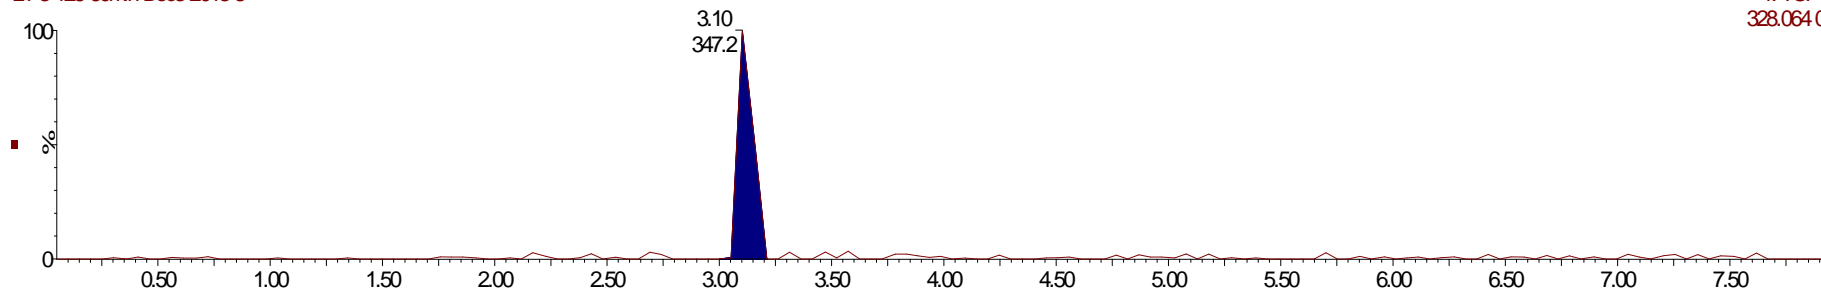

1: TOF MS ES+  
328.064 0.0100Da  
4.30e3  
Area

LY-3-125-15min-Dec3-2013-3

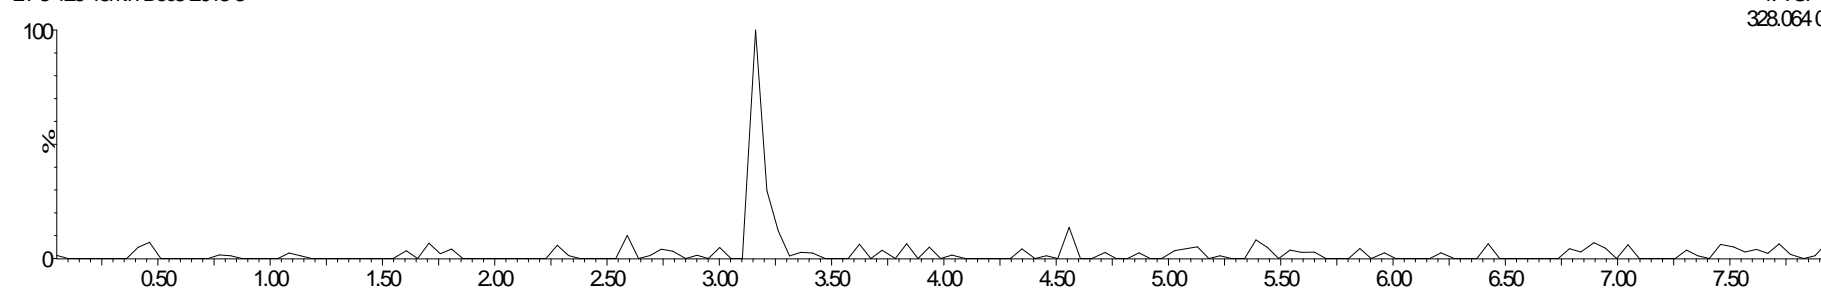

1: TOF MS ES+  
328.064 0.0100Da  
1.39e3  
Area

LY-3-125-0min-Dec3-2013-3

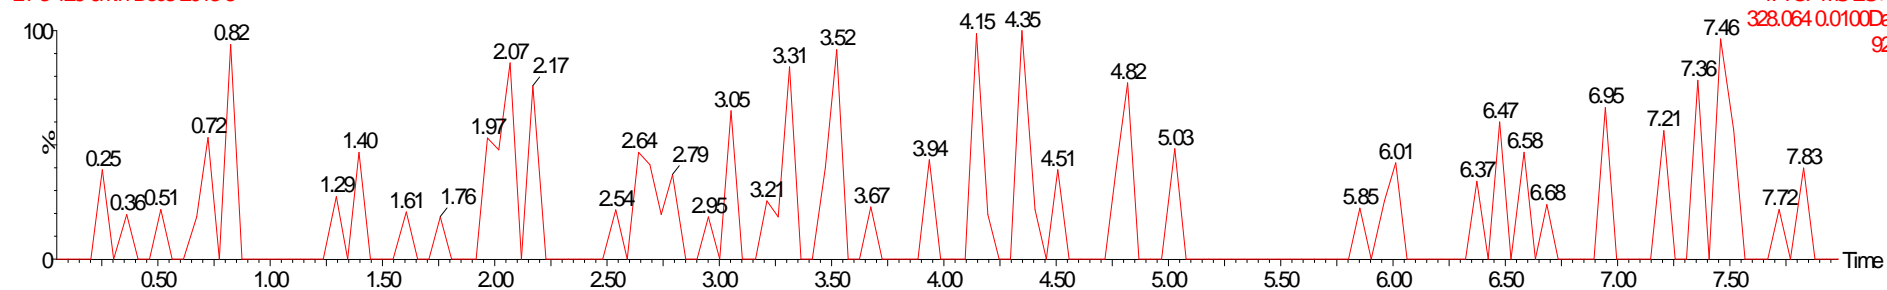

1: TOF MS ES+  
328.064 0.0100Da  
92

# Mass spectrum of M3

treated

LY-3-125-15min-Dec3-2013-3 74 (3.834) Cm (74:75)

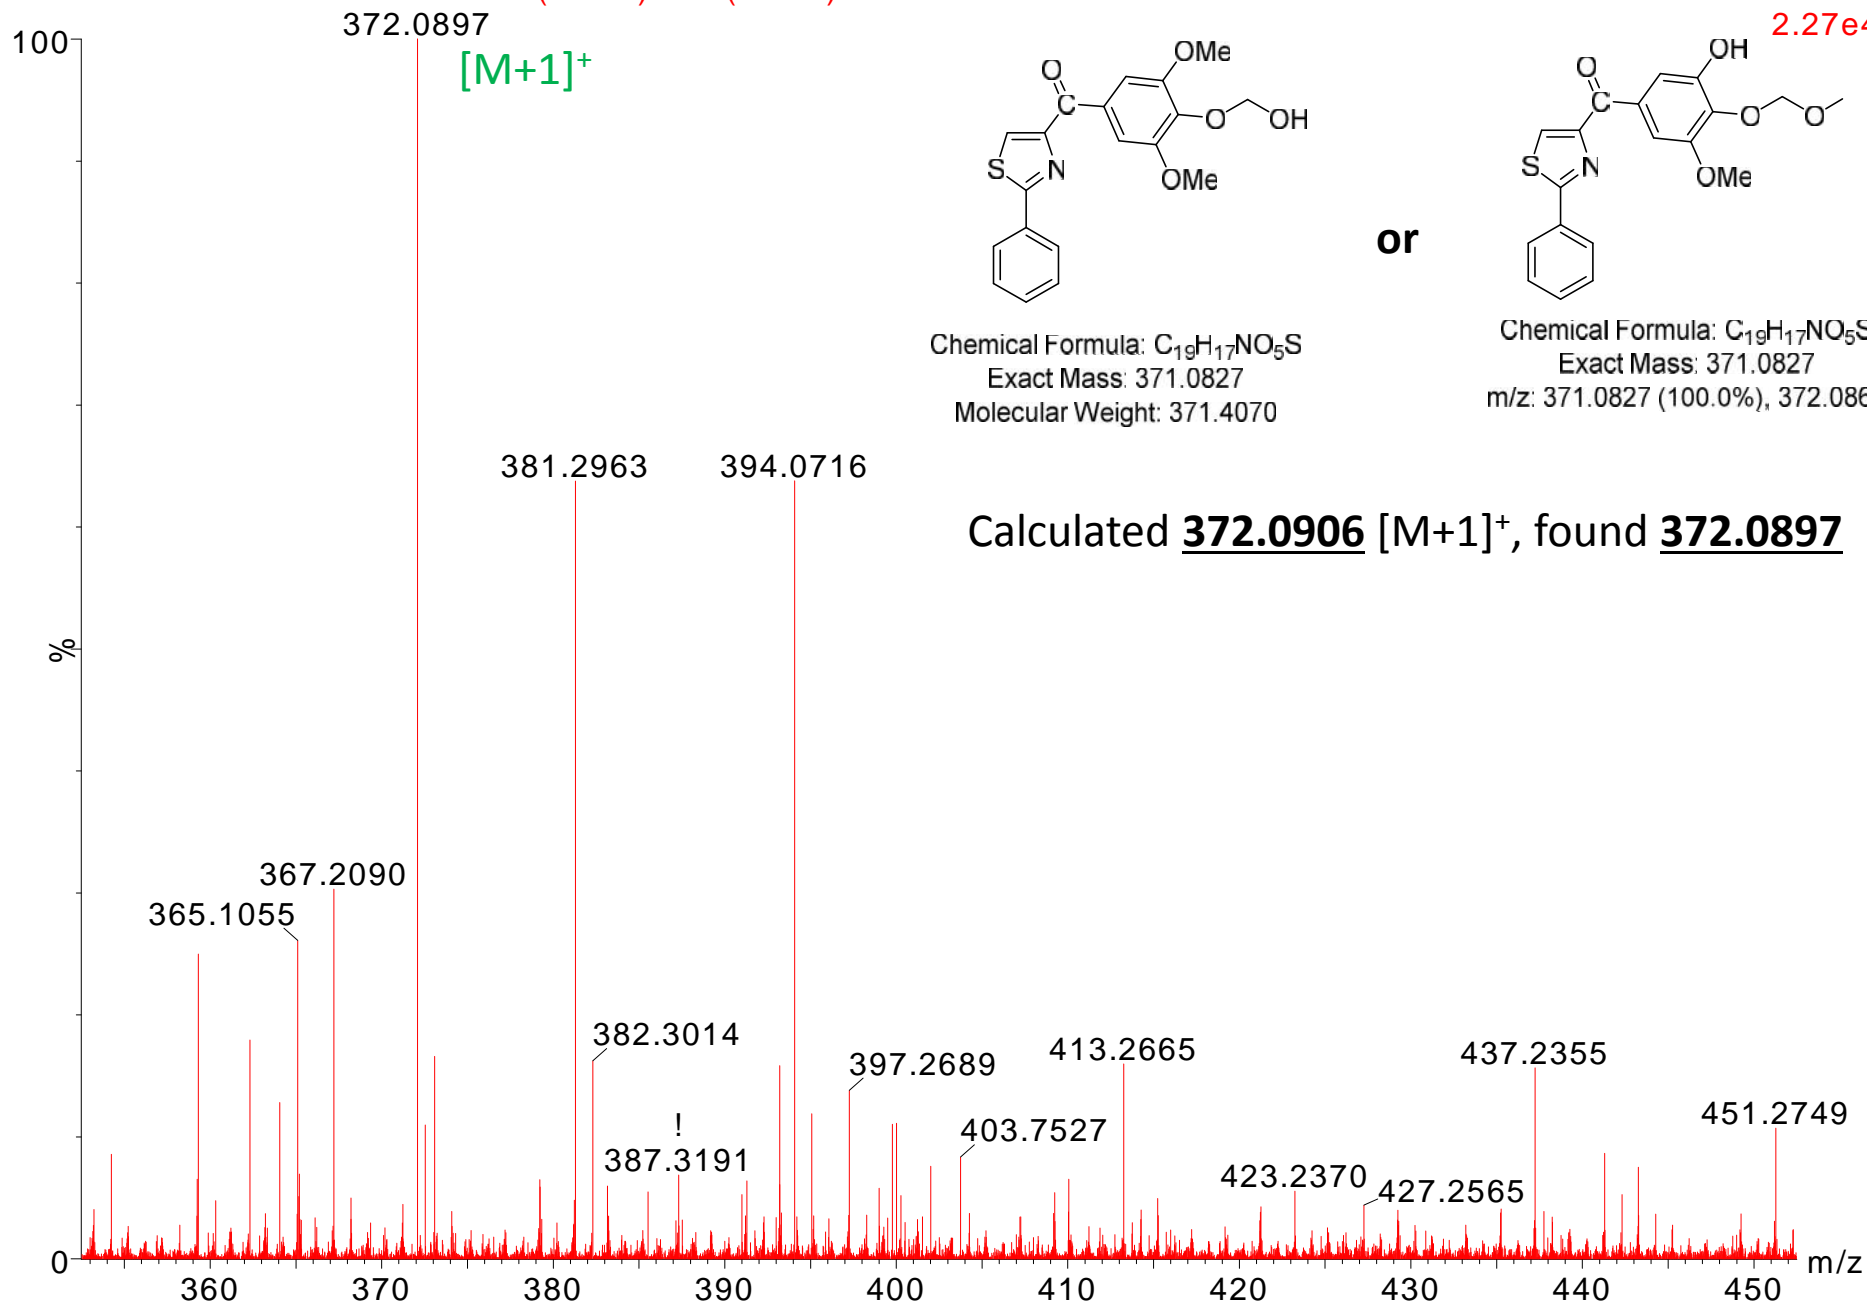



# Chromatogram of M3 (extracted at 372.0906)

treated

LY-3-125-120min-Dec3-2013-3

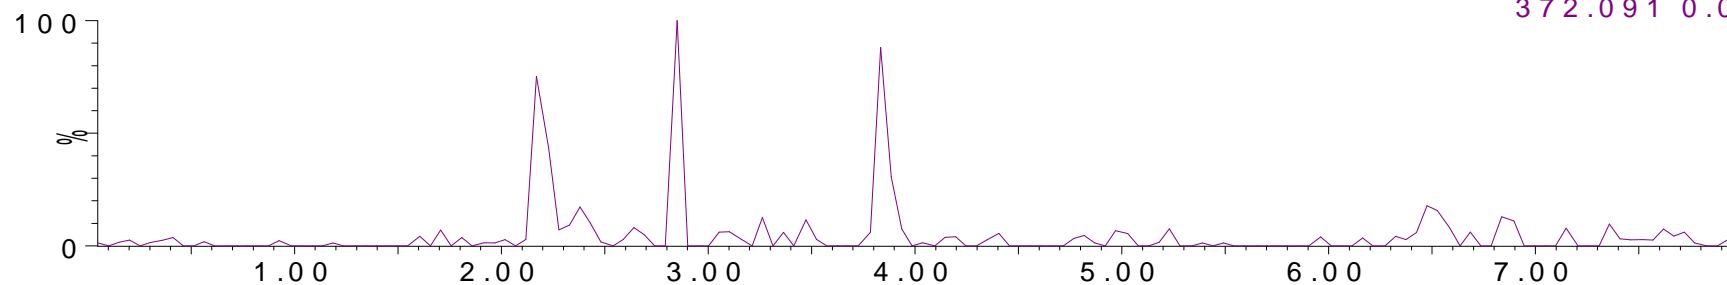

LY-3-125-60min-Dec3-2013-3

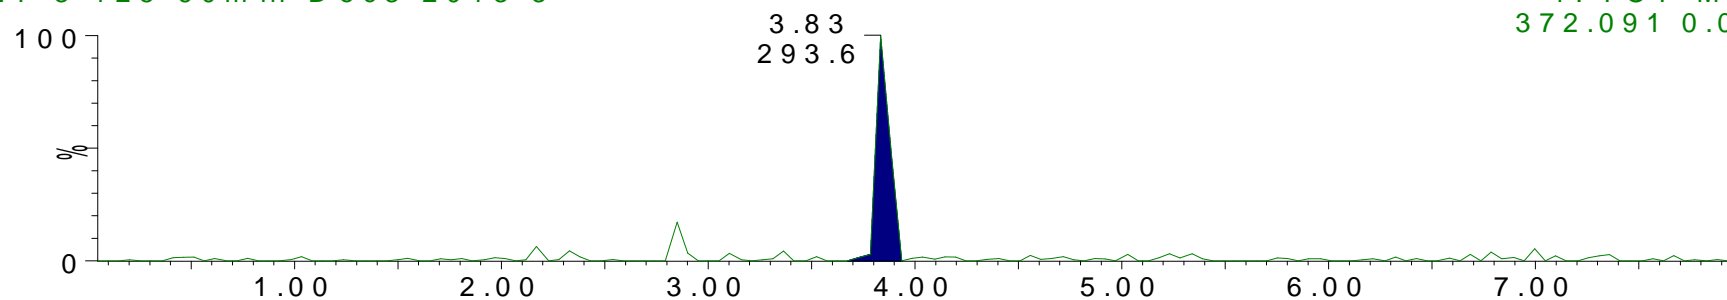

LY-3-125-15min-Dec3-2013-3

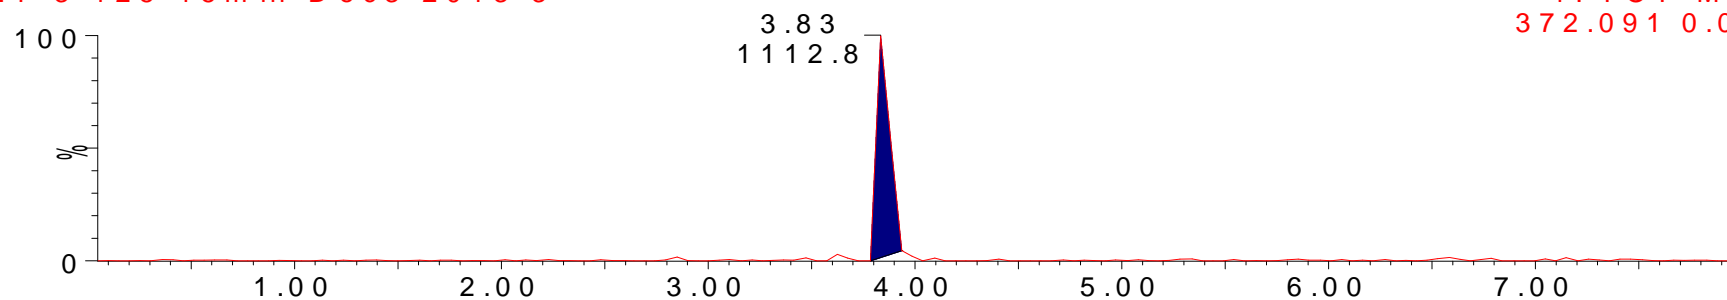

LY-3-125-0min-Dec3-2013-3

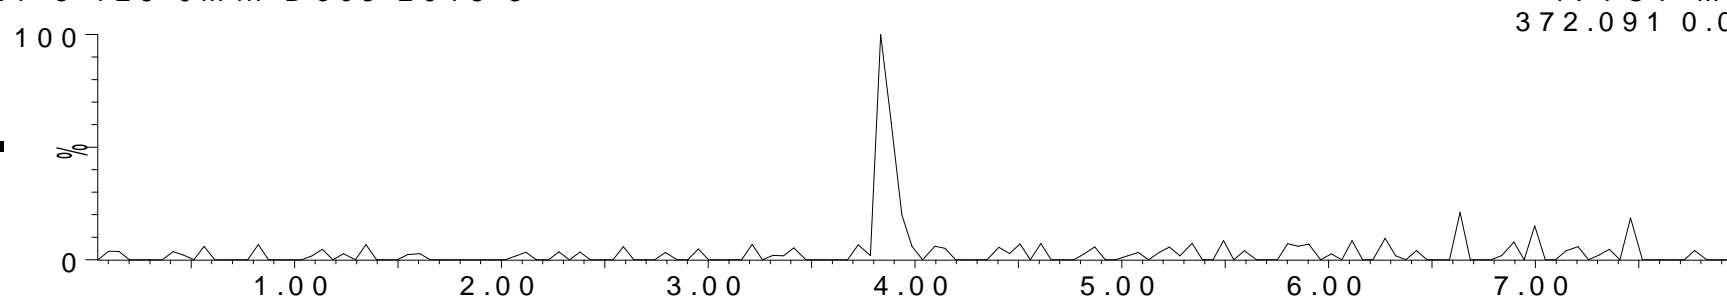

# Mass spectrum of M4

treated

LY-3-125-120min-Dec3-2013-3 69 (3.574) Cm (69)

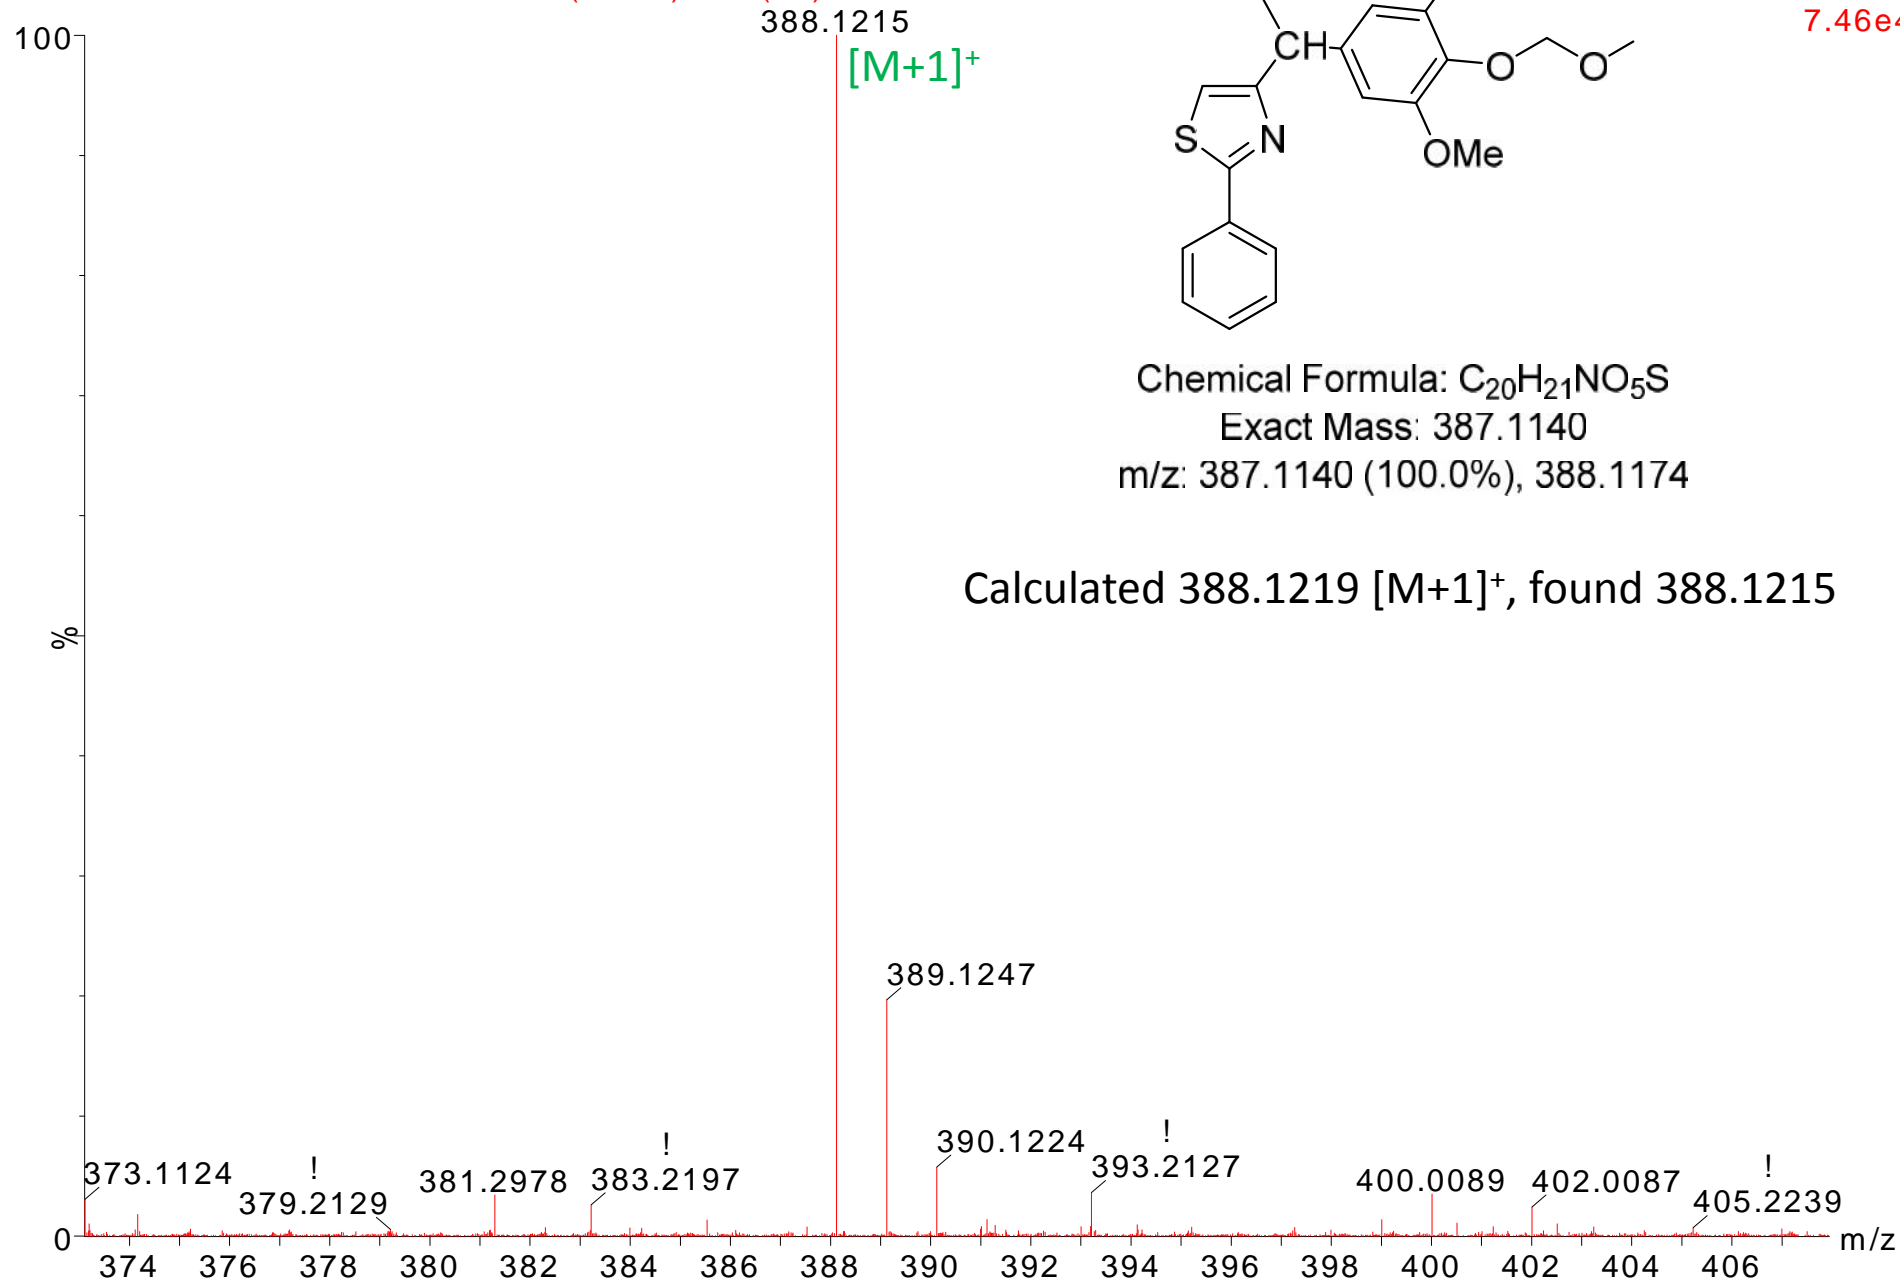

# Chromatogram of M4 (extracted at 388.1219)

treated

LY-3-125-120min-Dec3-2013-3

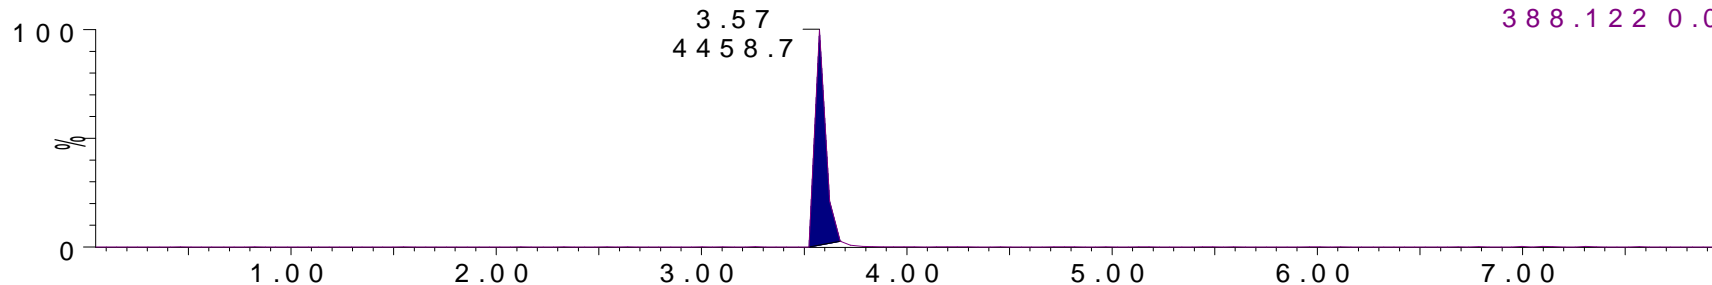

1: TOF MS ES+  
388.122 0.0100Da  
7.46e4  
Area

LY-3-125-60min-Dec3-2013-3

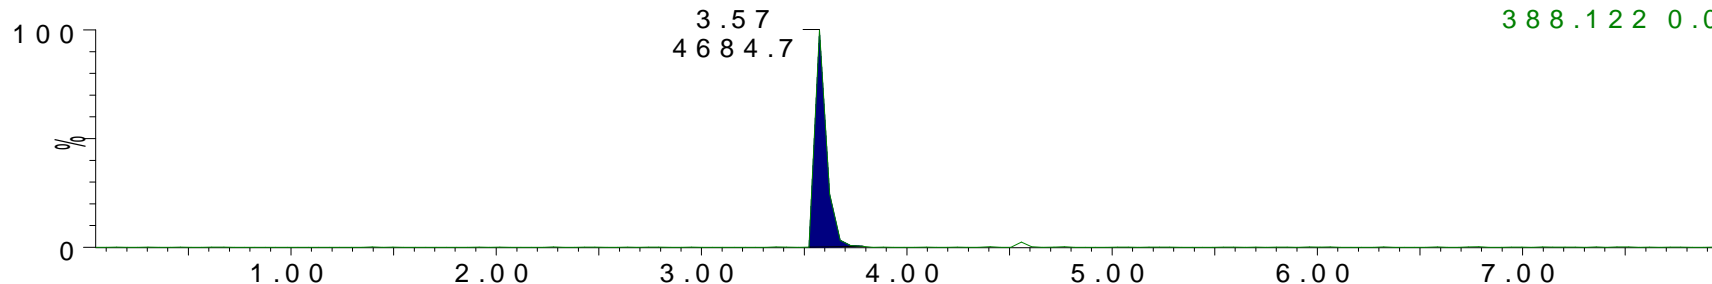

1: TOF MS ES+  
388.122 0.0100Da  
7.28e4  
Area

LY-3-125-15min-Dec3-2013-3

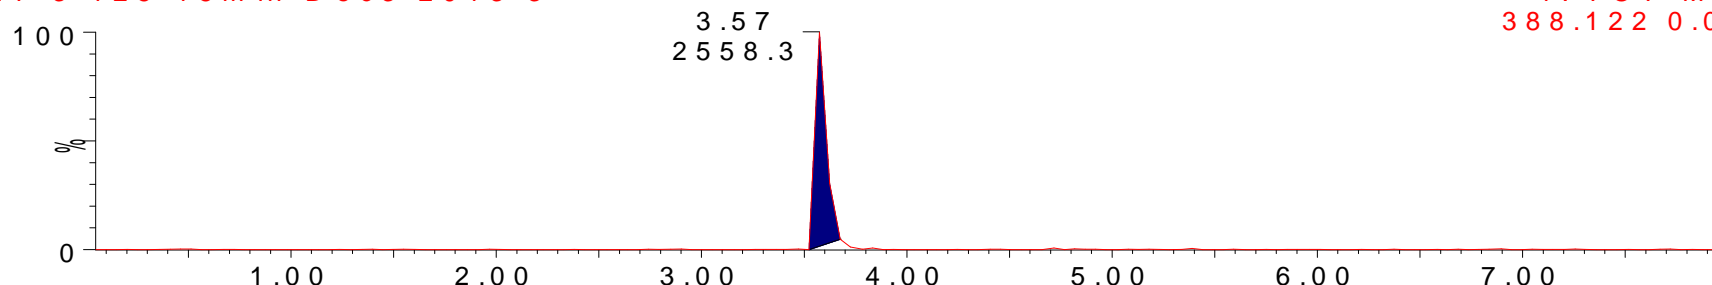

1: TOF MS ES+  
388.122 0.0100Da  
4.04e4  
Area

LY-3-125-0min-Dec3-2013-3

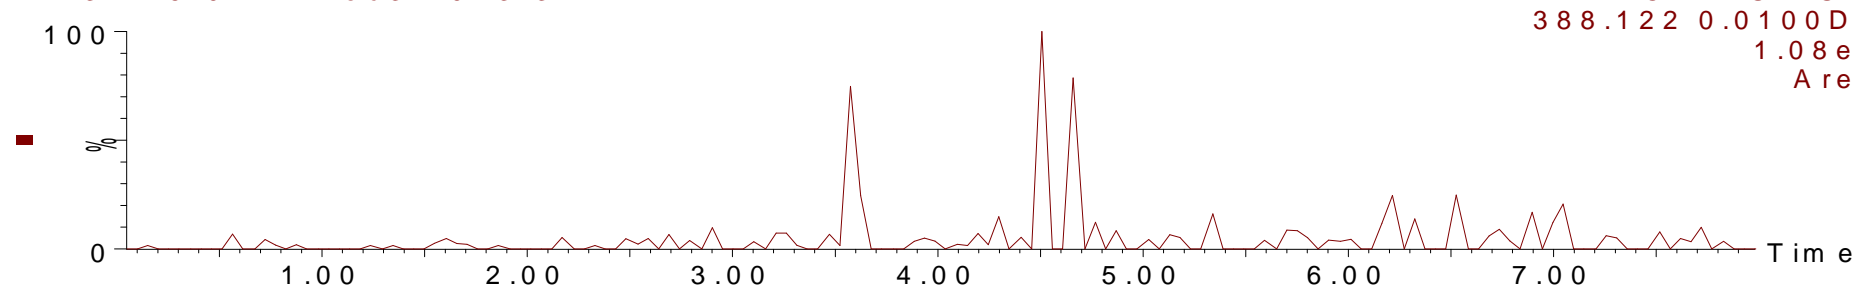

1: TOF MS ES+  
388.122 0.0100Da  
1.08e3  
Area

treated

LY-3-125-120min-Dec3-2013-3 32 (1.656) Cm (32)

# Mass spectrum of M5

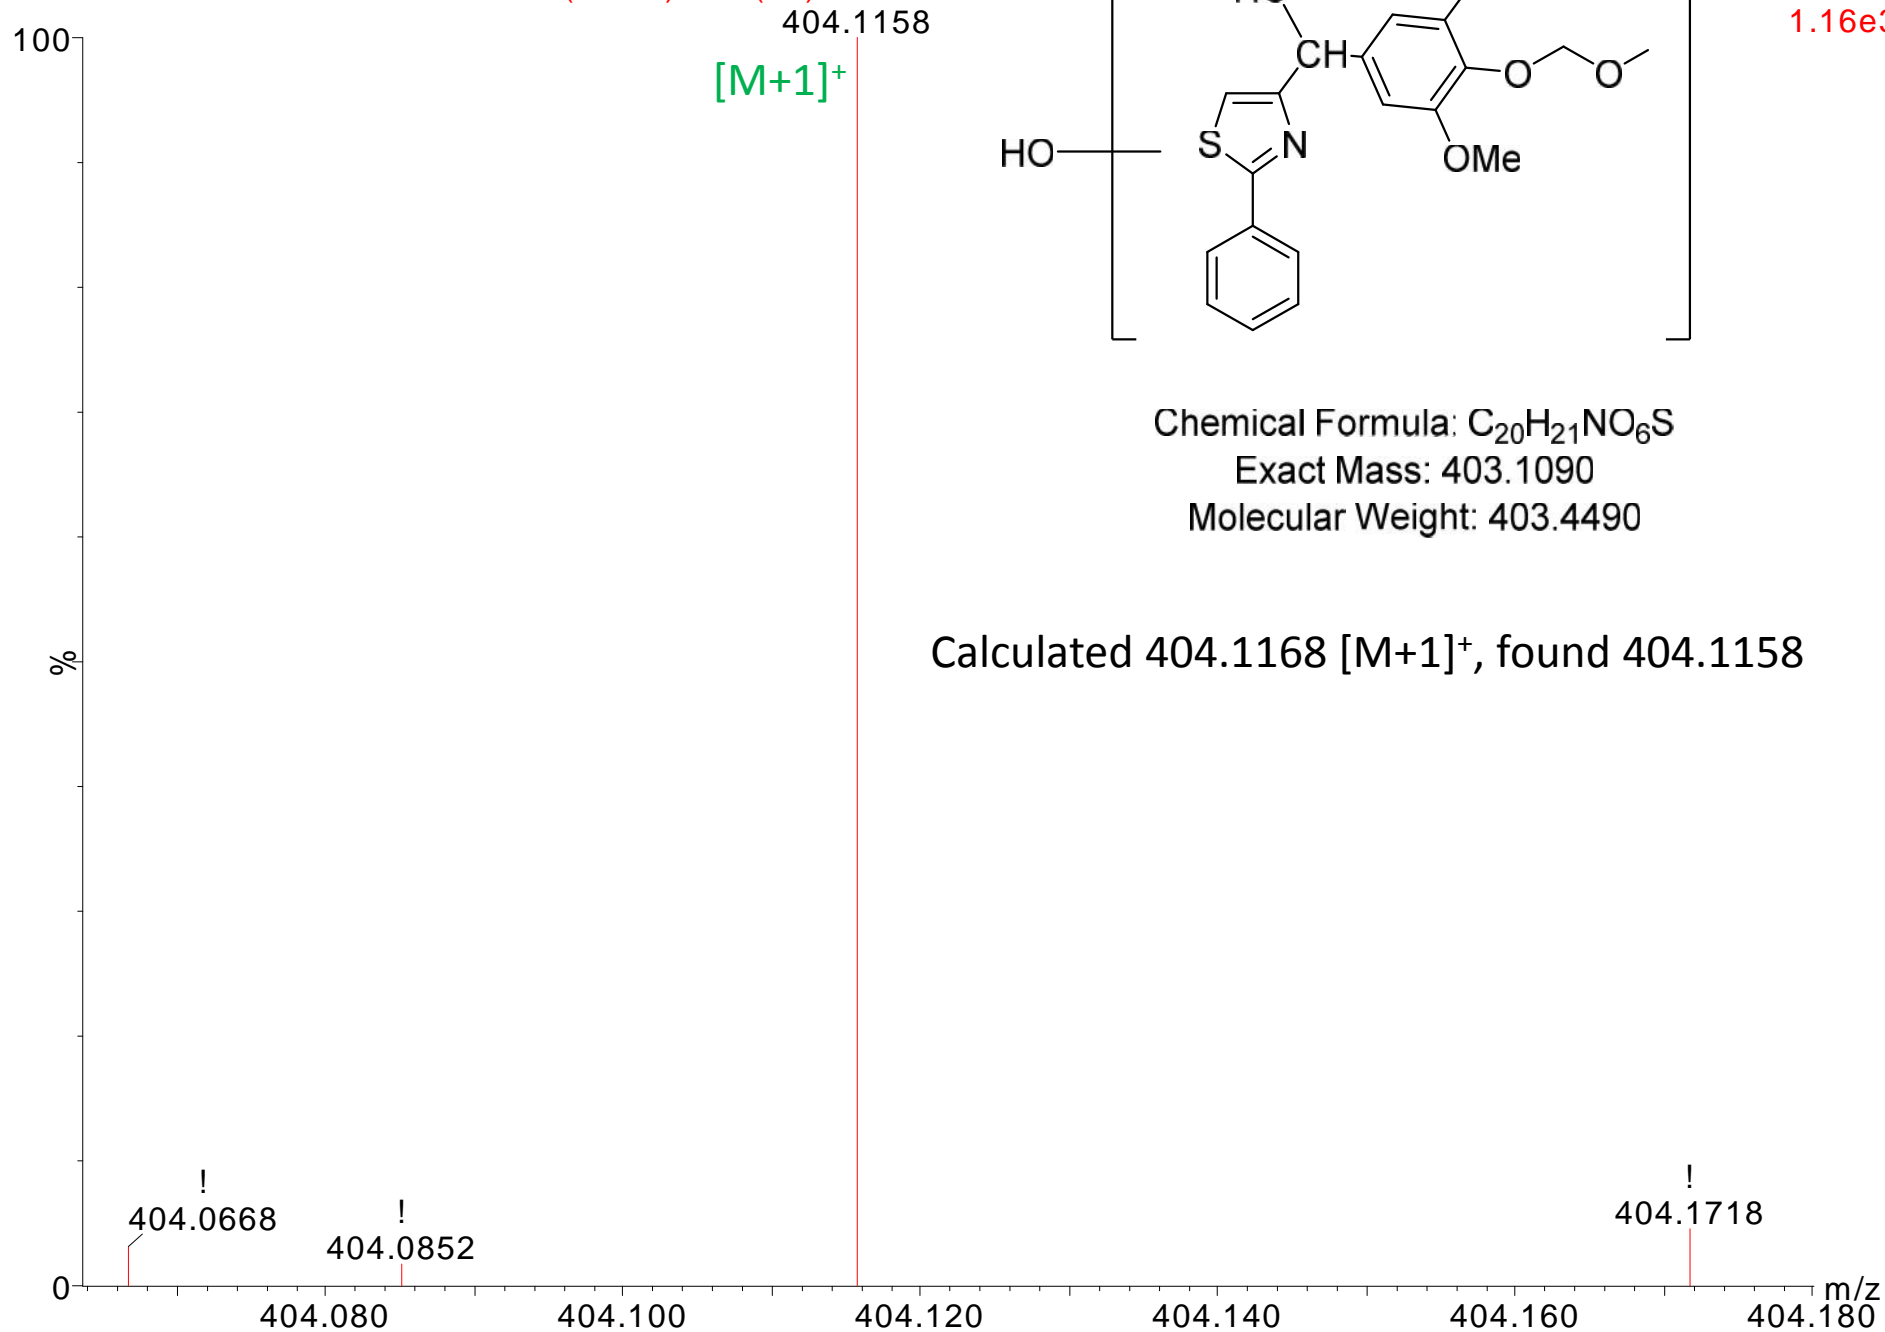

# Chromatogram of M5 (extracted at 404.1168)

treated

LY-3-125-120m in-Dec3-2013-3

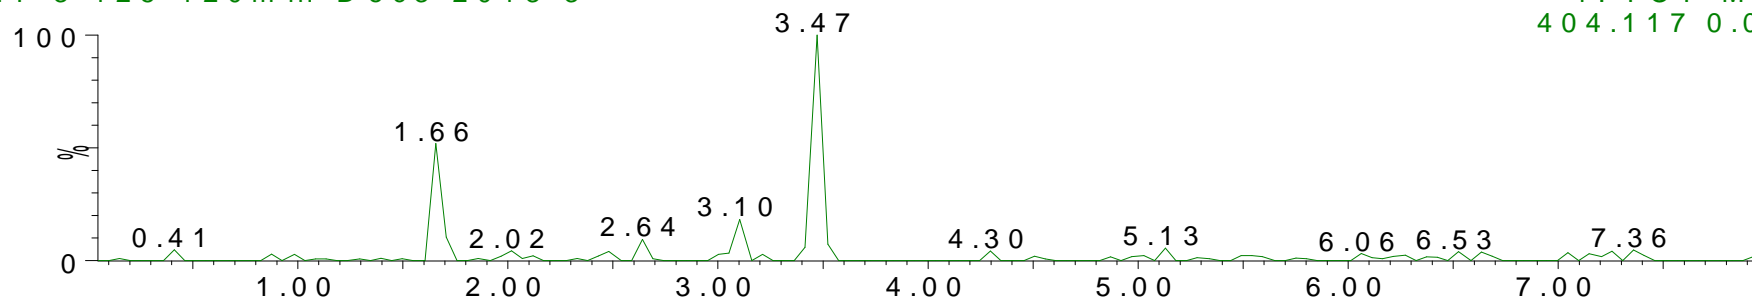

LY-3-125-60m in-Dec3-2013-3

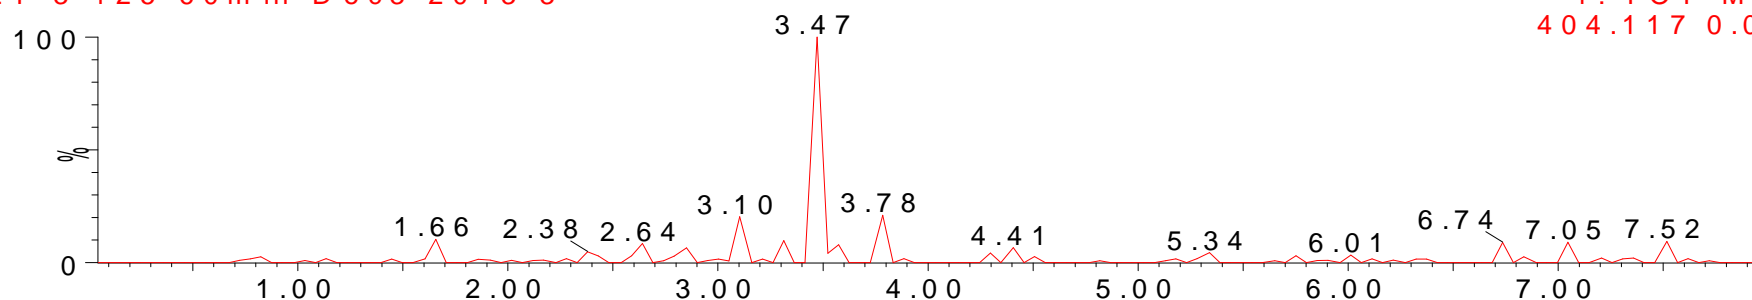

LY-3-125-15m in-Dec3-2013-3

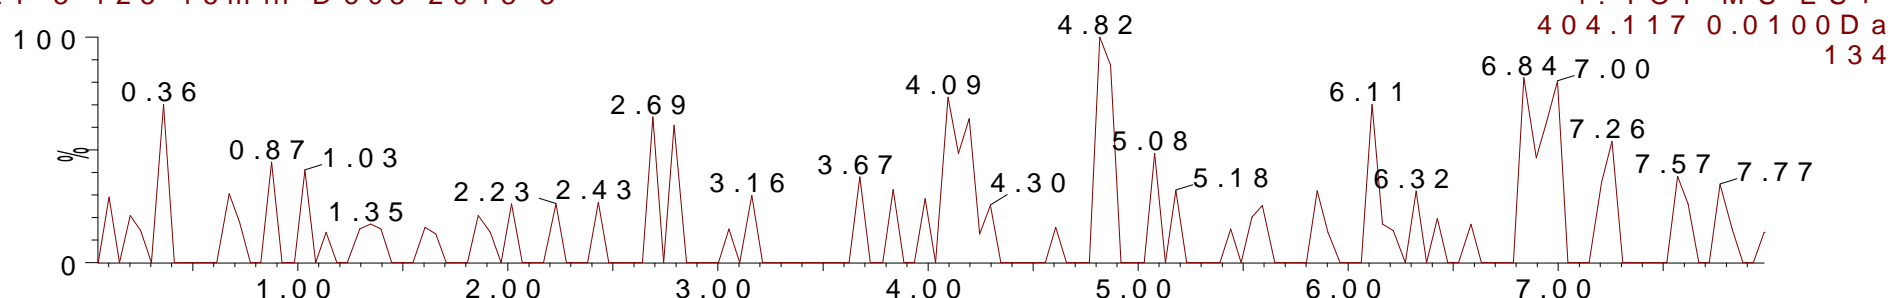

LY-3-125-0m in-Dec3-2013-3

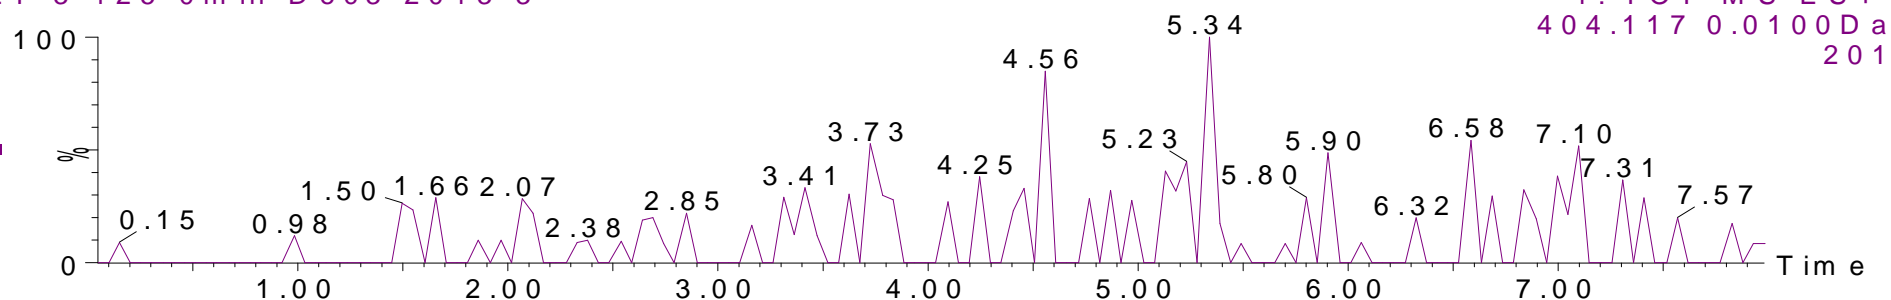

treated

# Mass spectrum of 18

LY-3-128-0min-Dec3-2013-3 49 (2.539) Cm (48:49)

1: TOF MS ES+  
4.43e6

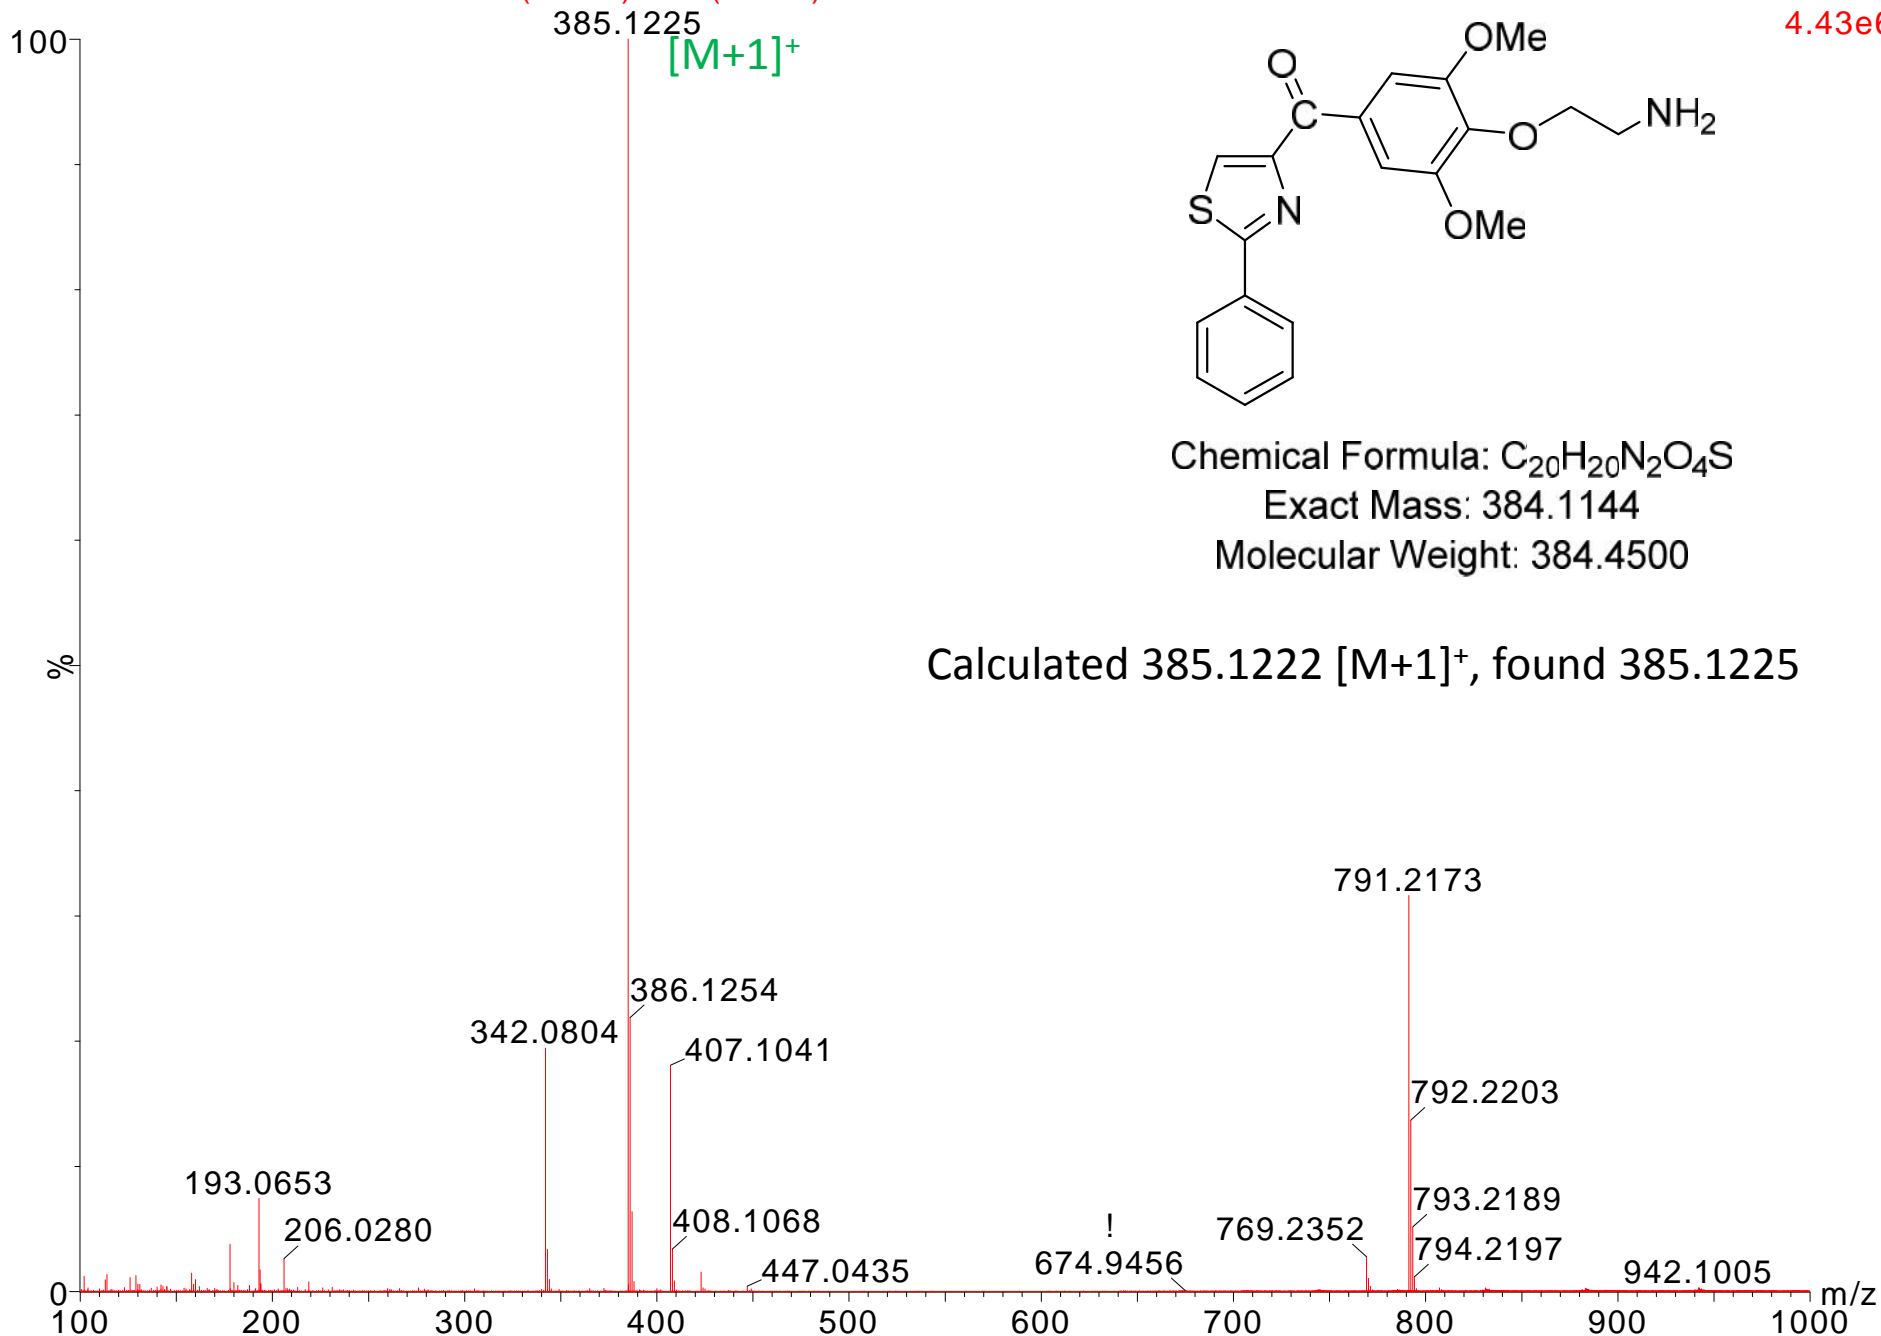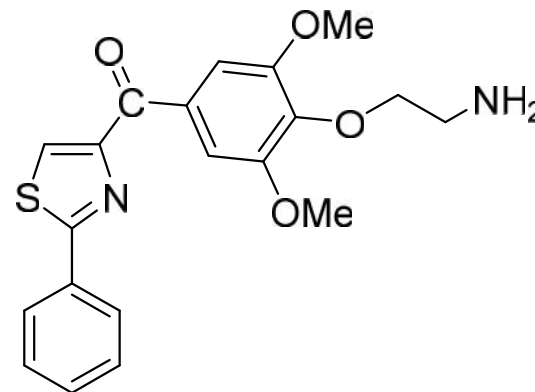

Chemical Formula: C<sub>20</sub>H<sub>20</sub>N<sub>2</sub>O<sub>4</sub>S  
Exact Mass: 384.1144  
Molecular Weight: 384.4500

Calculated 385.1222 [M+1]<sup>+</sup>, found 385.1225

# Chromatogram of 18 (extracted at 385.1222)

treated

LY-3-128-120min-Dec3-2013-3

1: TOF MS ES+  
385.122 0.0100Da  
2.06e6  
Area

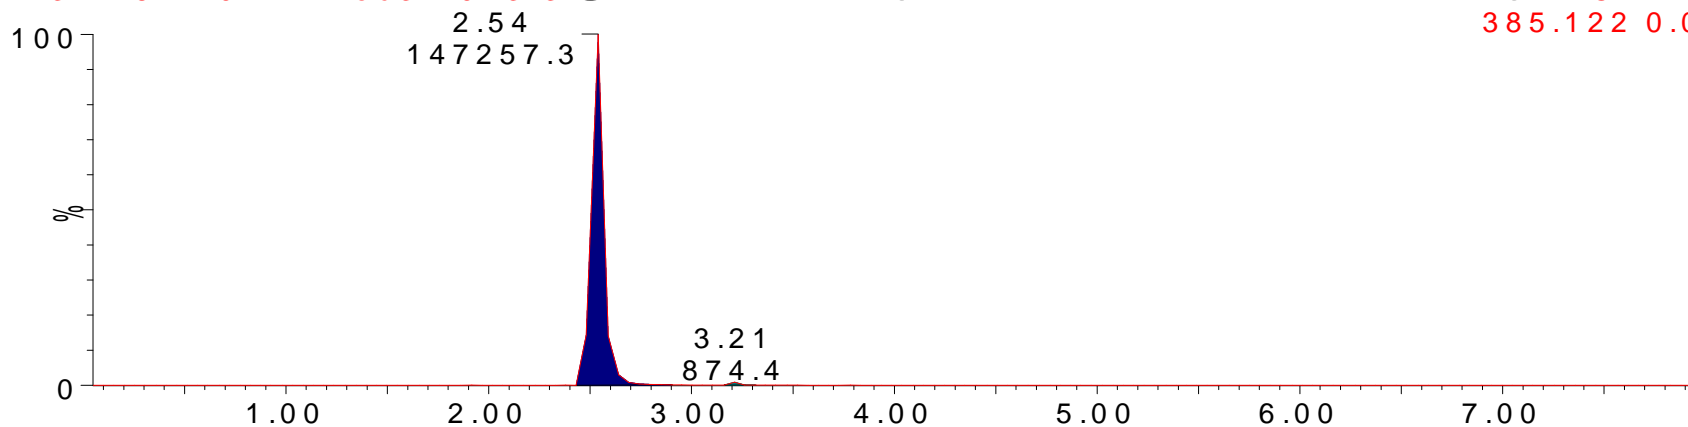

LY-3-128-60min-Dec3-2013-3

1: TOF MS ES+  
385.122 0.0100Da  
2.71e6  
Area

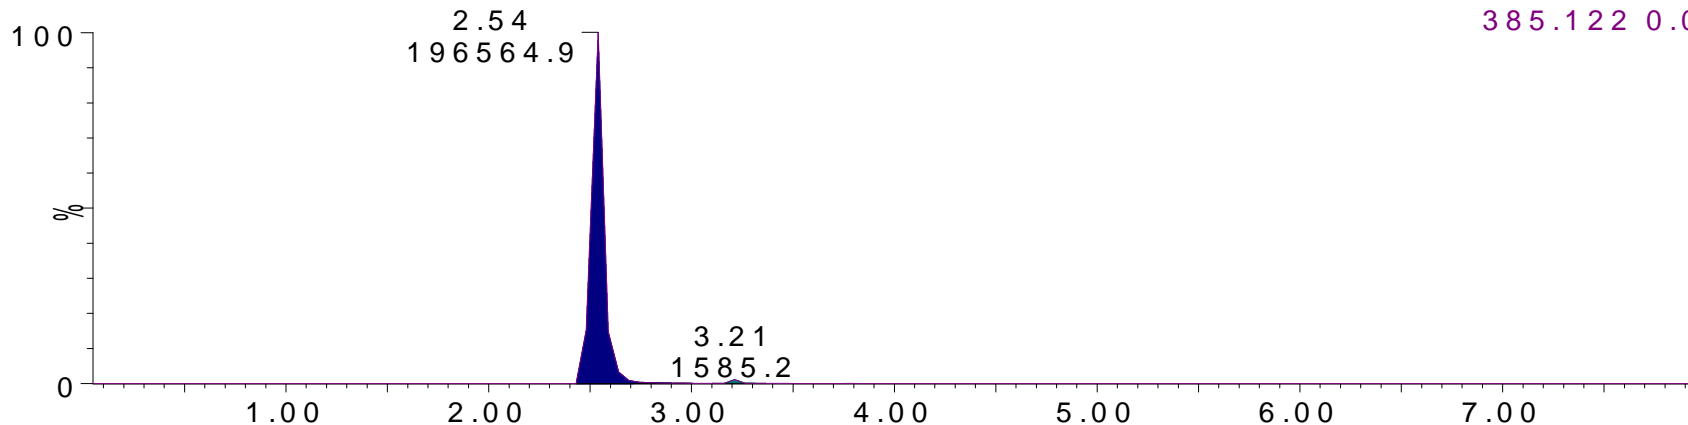

LY-3-128-0min-Dec3-2013-3

1: TOF MS ES+  
385.122 0.0100Da  
3.35e6  
Area

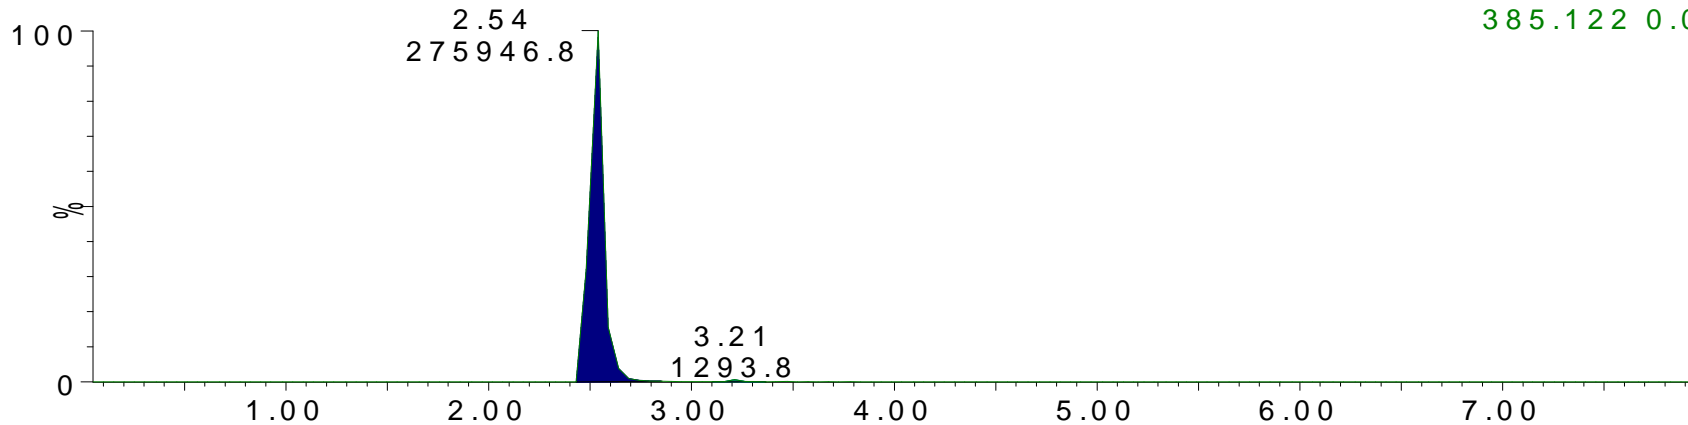

Time

# Mass spectrum of M6

treated

LY-3-128-0min-Dec3-2013-3 49 (2.539) Cm (48,49)

[M+1]<sup>+</sup> 1: TOF MS ES+  
342.0804 8.60e5

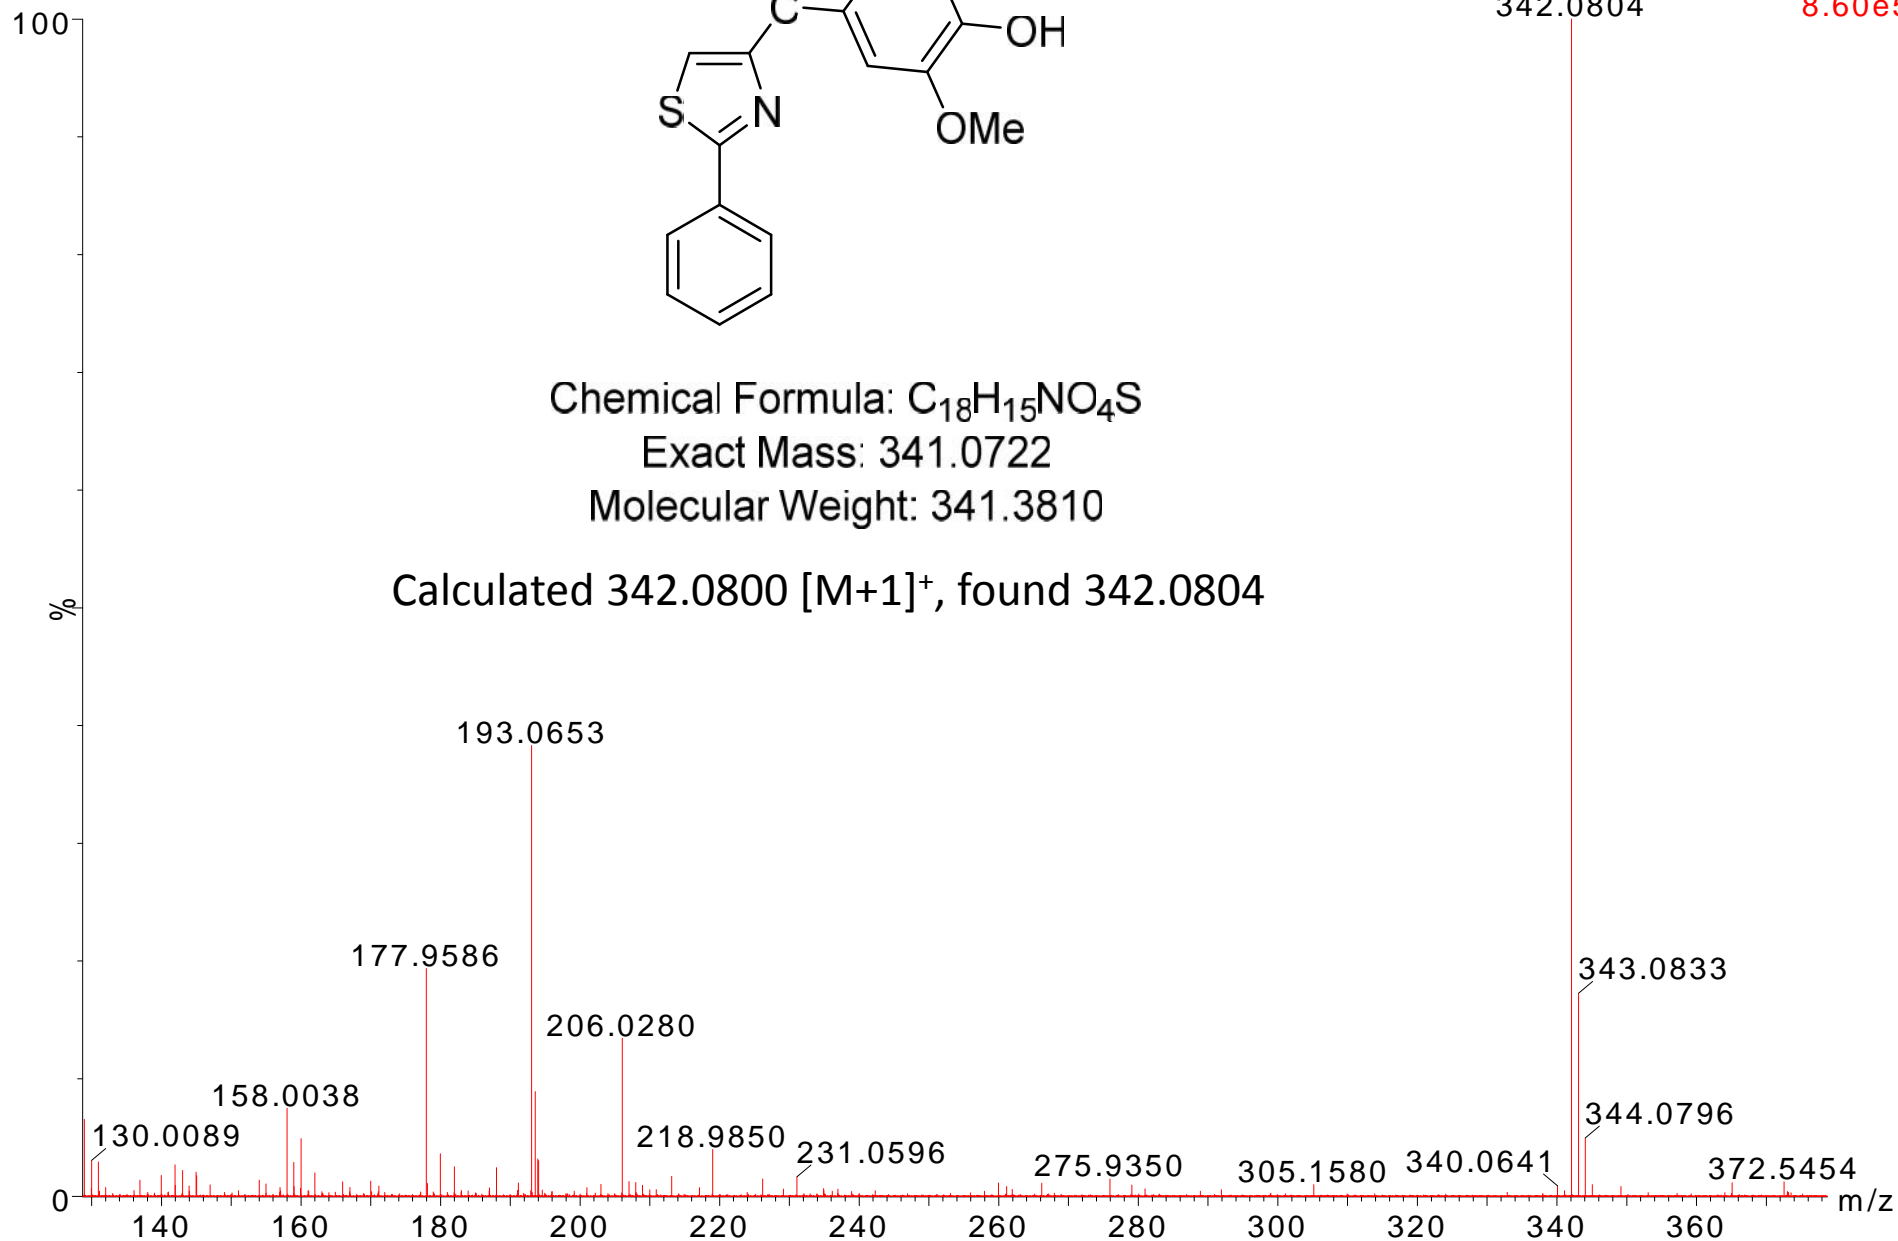



# Chromatogram of M6 (extracted at 342.0800)

treated

LY-3-128-0 min-Dec3-2013-3

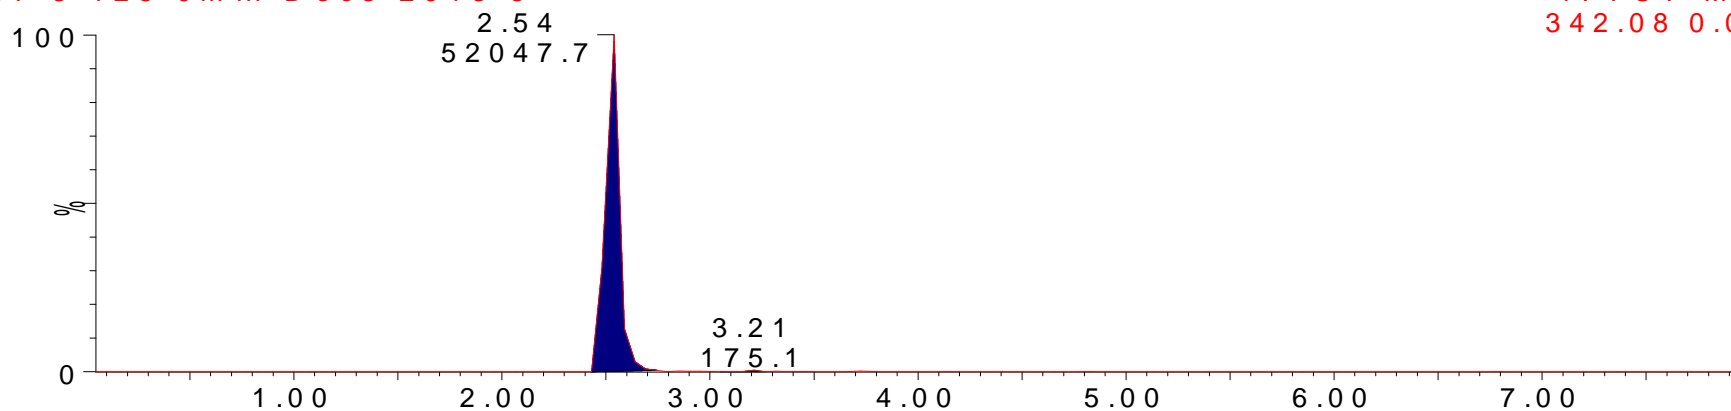

1: TOF MS ES+  
342.08 0.0100Da  
6.59e5  
Area

LY-3-128-60 min-Dec3-2013-3

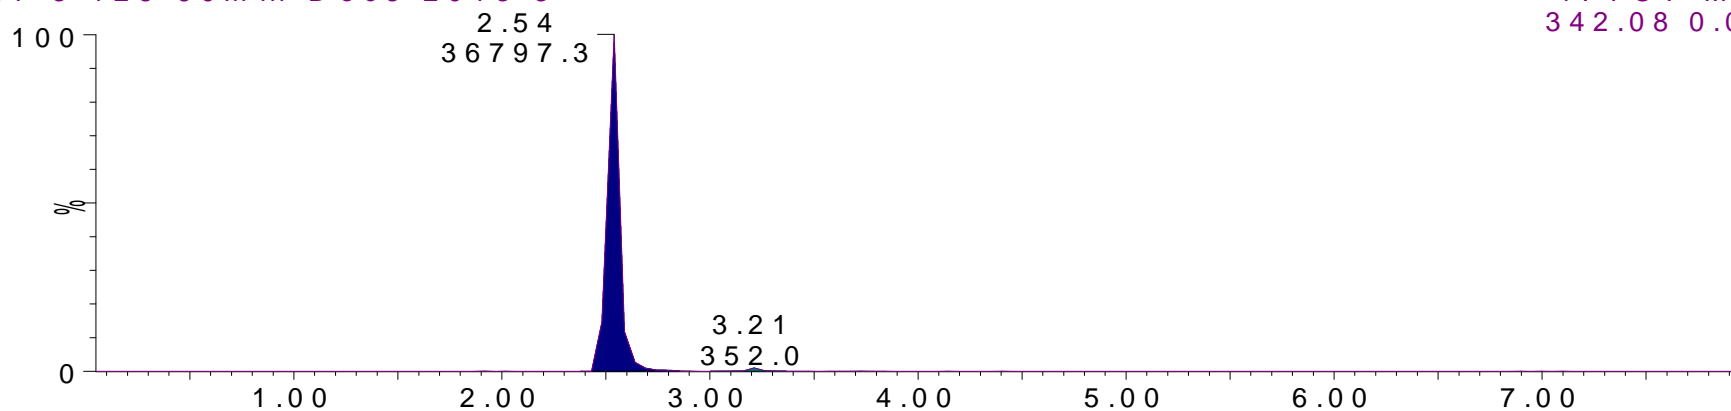

1: TOF MS ES+  
342.08 0.0100Da  
5.24e5  
Area

LY-3-128-120 min-Dec3-2013-3

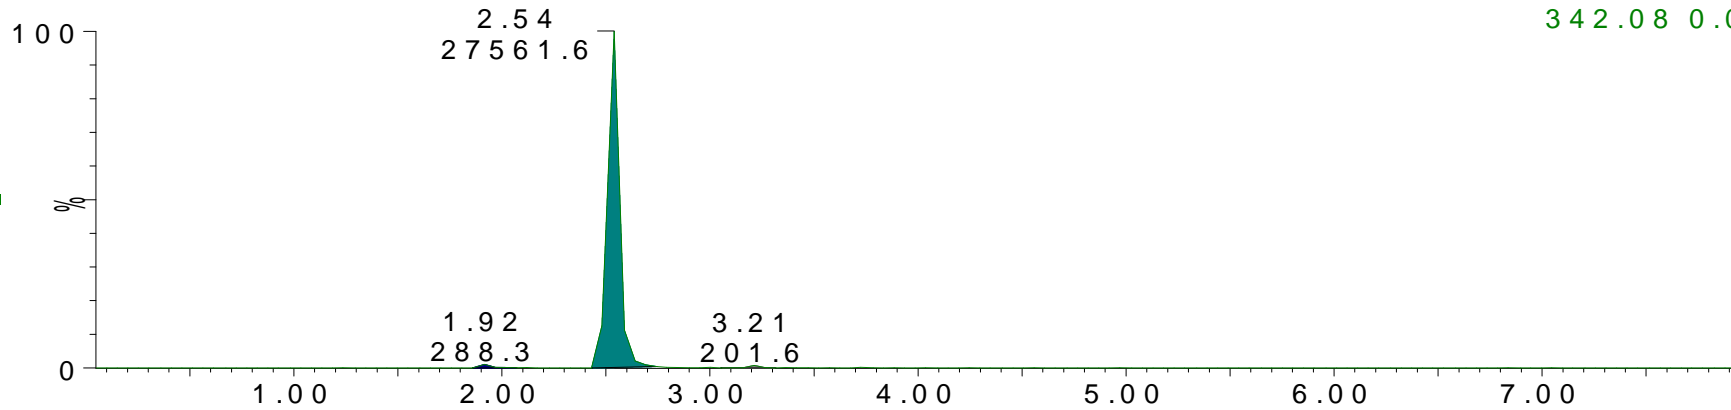

1: TOF MS ES+  
342.08 0.0100Da  
4.06e5  
Area

■

Time

treated

LY-3-128-120min-Dec3-2013-3 56 (2.901) Cm (56)

# Mass spectrum of M7

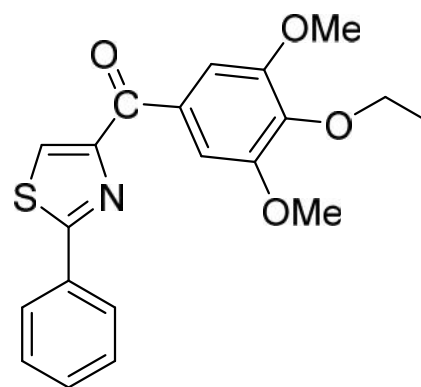

Chemical Formula: C<sub>20</sub>H<sub>19</sub>NO<sub>4</sub>S

Exact Mass: 369.1035

Molecular Weight: 369.4342

Calculated 370.1113 [M+1]<sup>+</sup>, found 370.1110

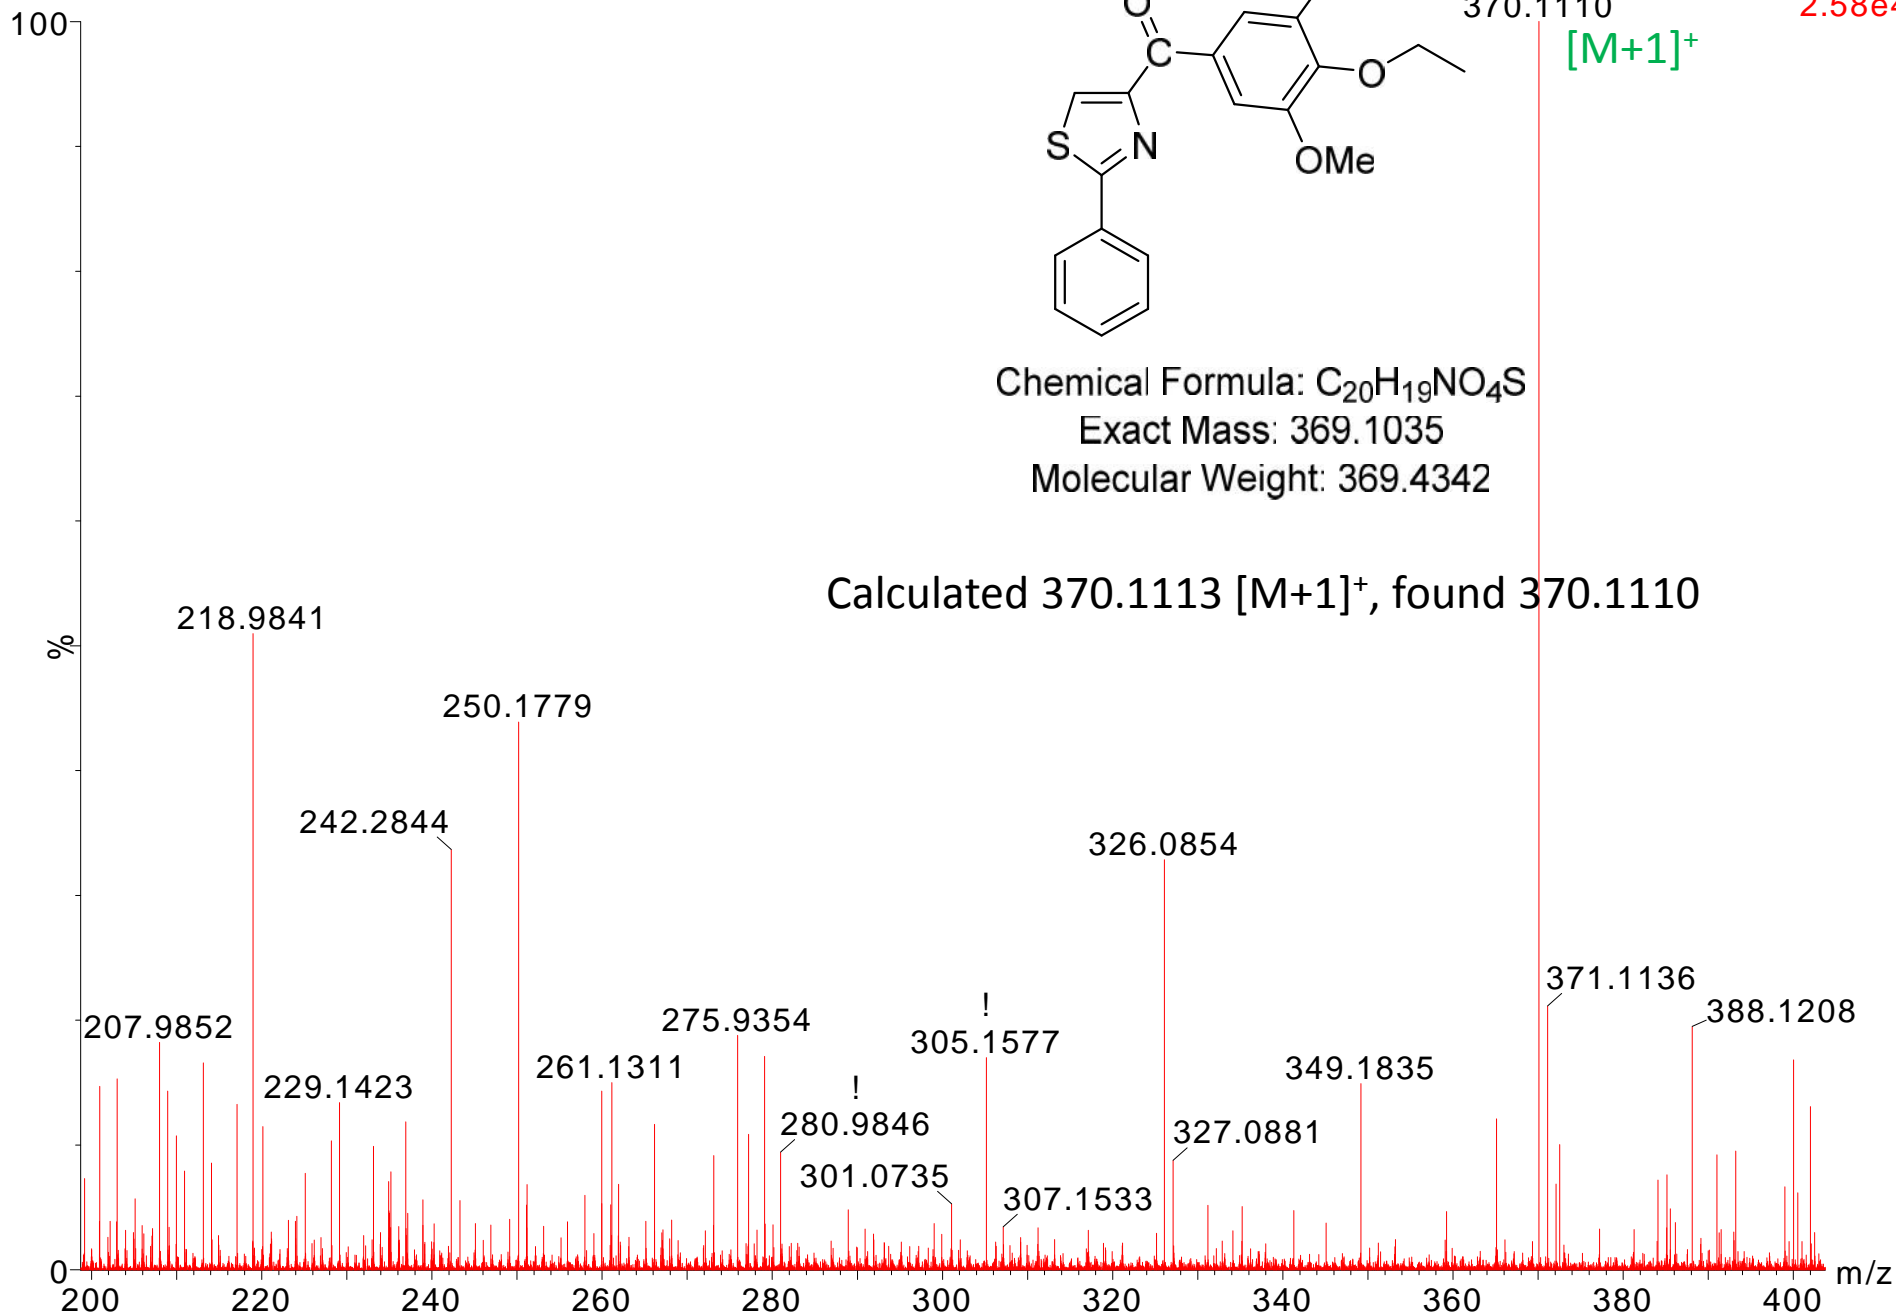

# Chromatogram of M7 (extracted at 370.1113)

treated

LY-3-128-120m in-Dec3-2013-3

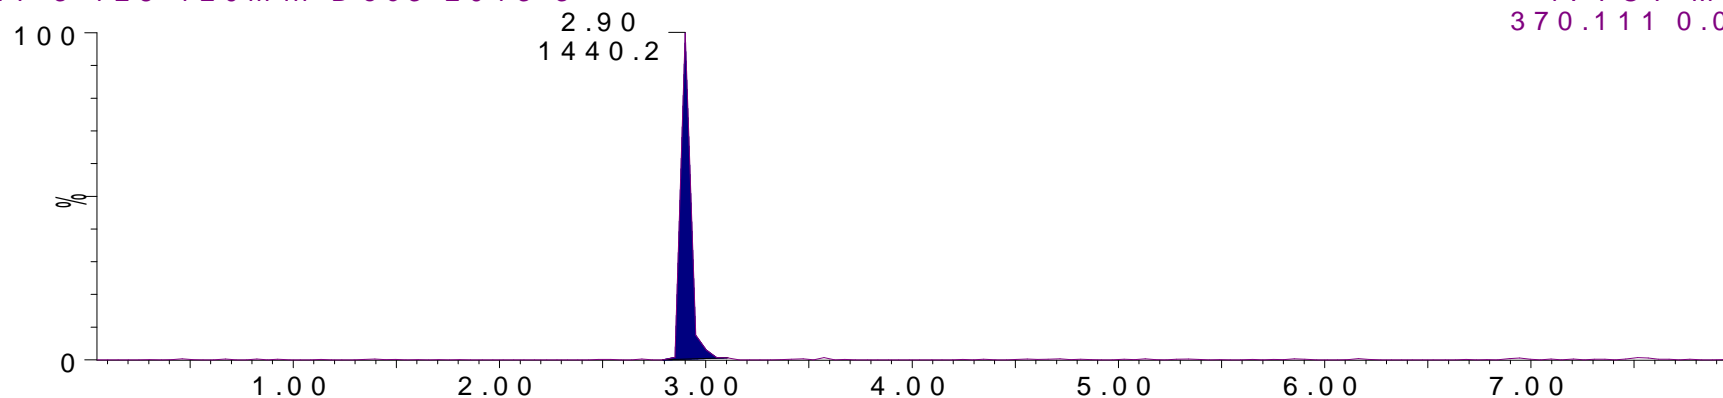

1: TOF MS ES+  
370.111 0.0100Da  
2.58e4  
Area

LY-3-128-60m in-Dec3-2013-3

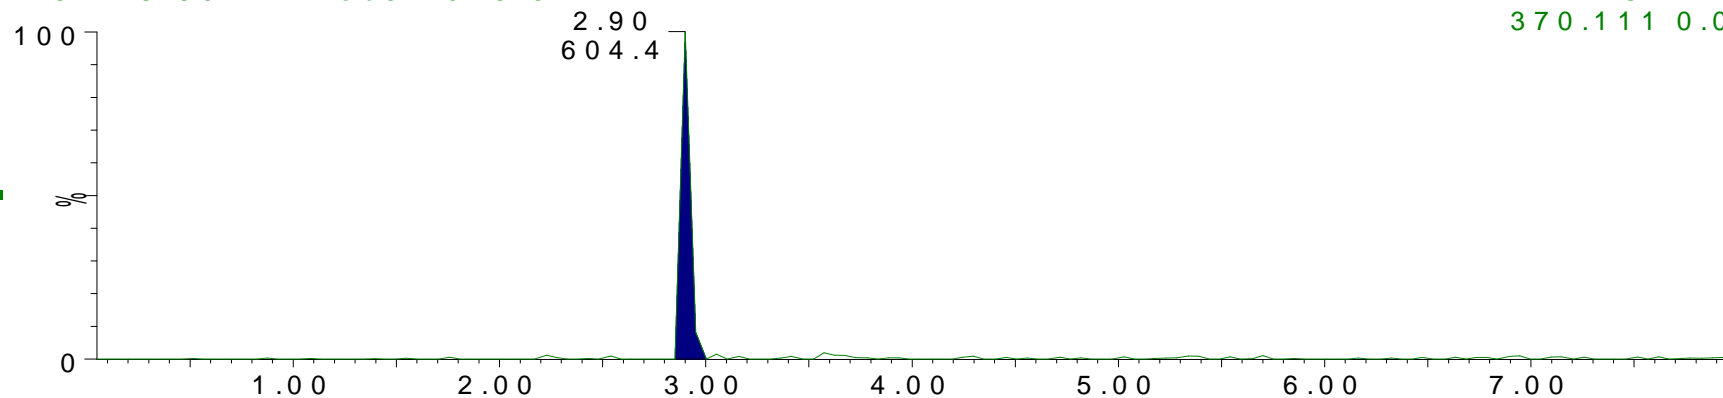

1: TOF MS ES+  
370.111 0.0100Da  
1.11e4  
Area

LY-3-128-0m in-Dec3-2013-3

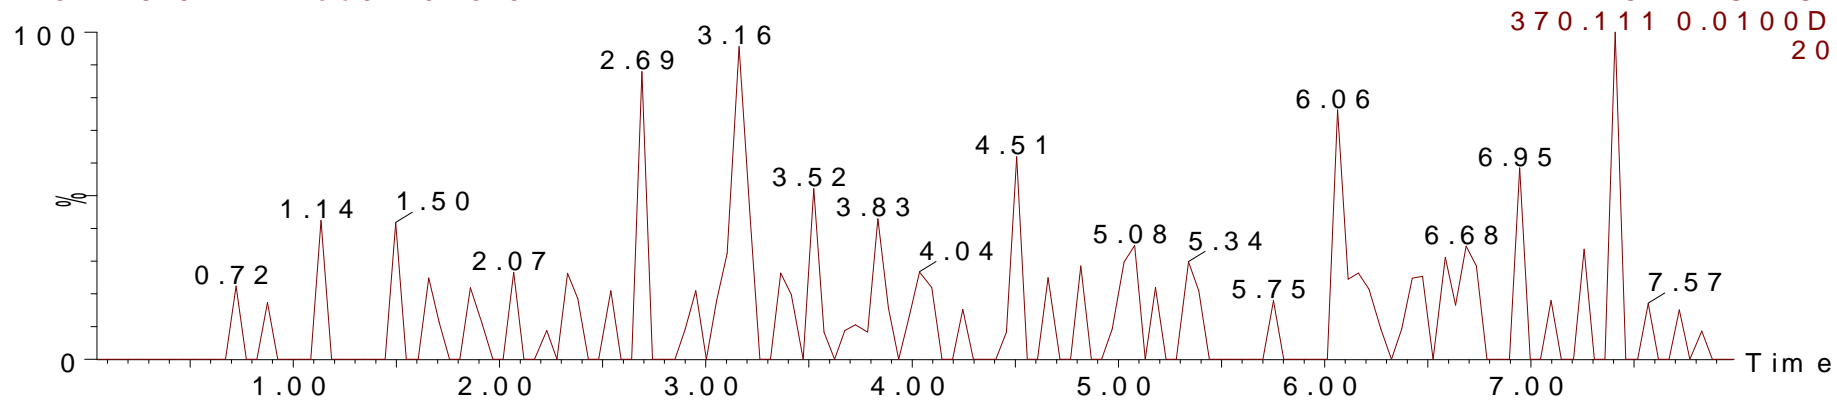

1: TOF MS ES+  
370.111 0.0100Da  
205

# Mass spectrum of M8

treated

LY-3-128-120min-Dec3-2013-3 38 (1.968) Cm (38:39)

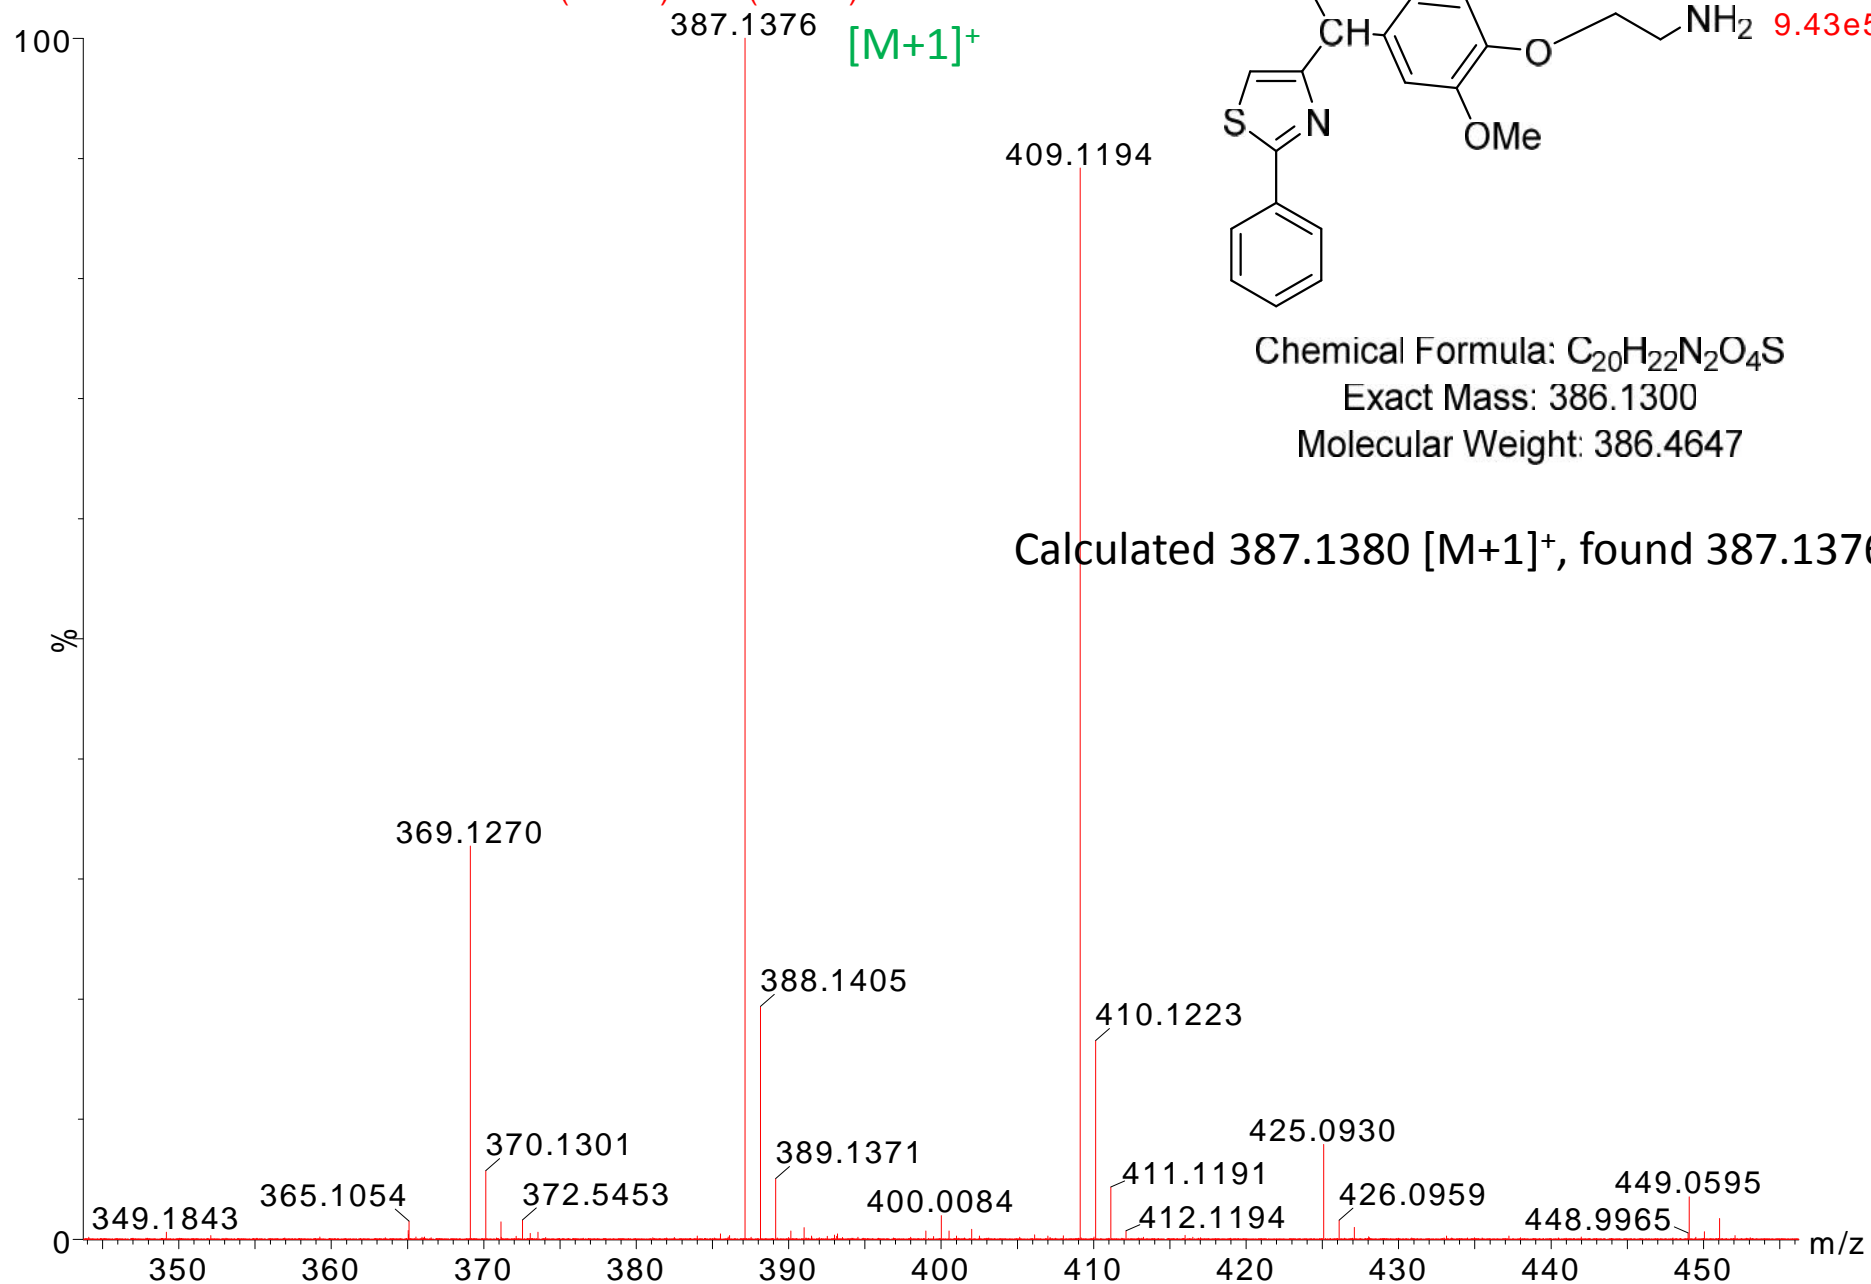

# Chromatogram of M8 (extracted at 387.1380)

treated

LY-3-128-120m in-Dec3-2013-3

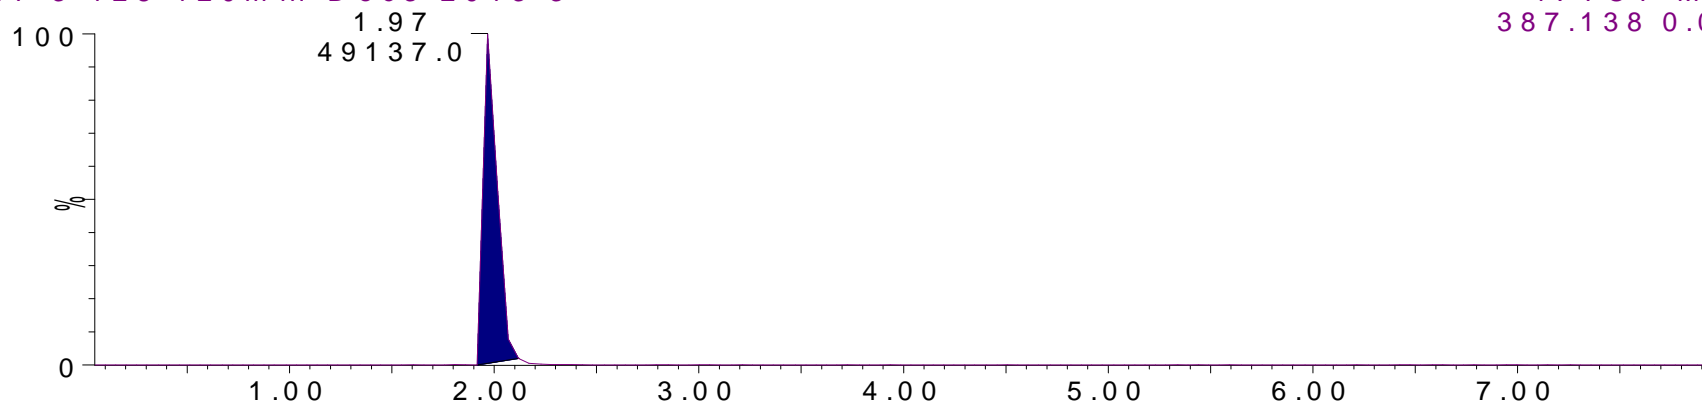

1: TOF MS ES+  
387.138 0.0100Da  
6.19e5  
Area

LY-3-128-60m in-Dec3-2013-3

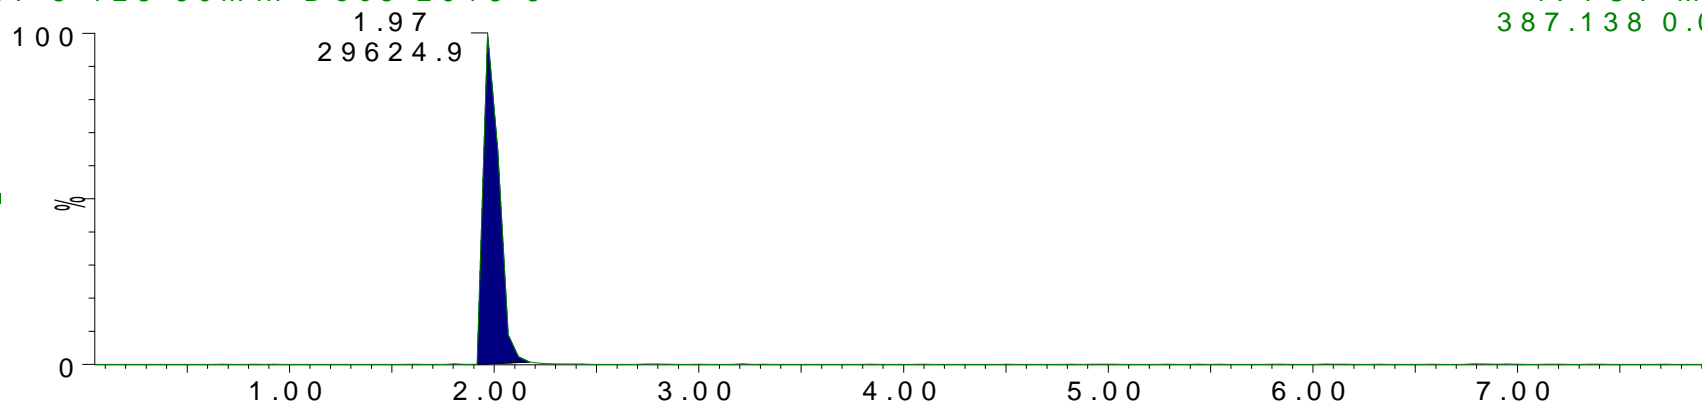

1: TOF MS ES+  
387.138 0.0100Da  
3.36e5  
Area

LY-3-128-0m in-Dec3-2013-3

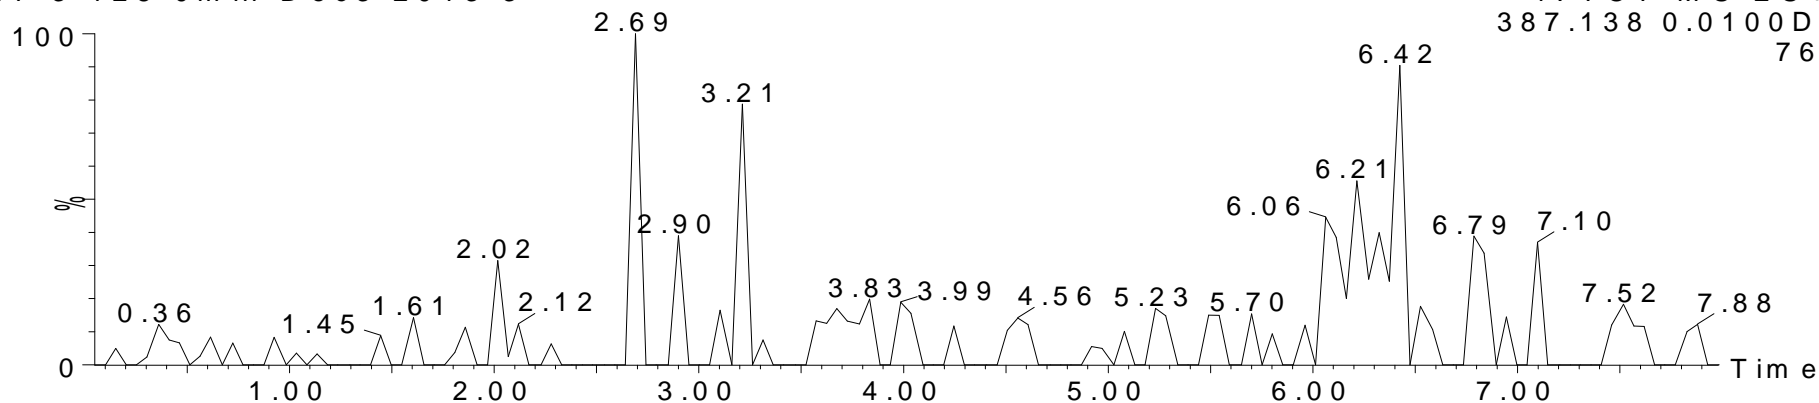

1: TOF MS ES+  
387.138 0.0100Da  
762

# Mass spectrum of 4

treated

LY-3-286-0min-Dec3-2013-3 49 (2.539) Cm (49:50)

1: TOF MS ES+  
2.26e6

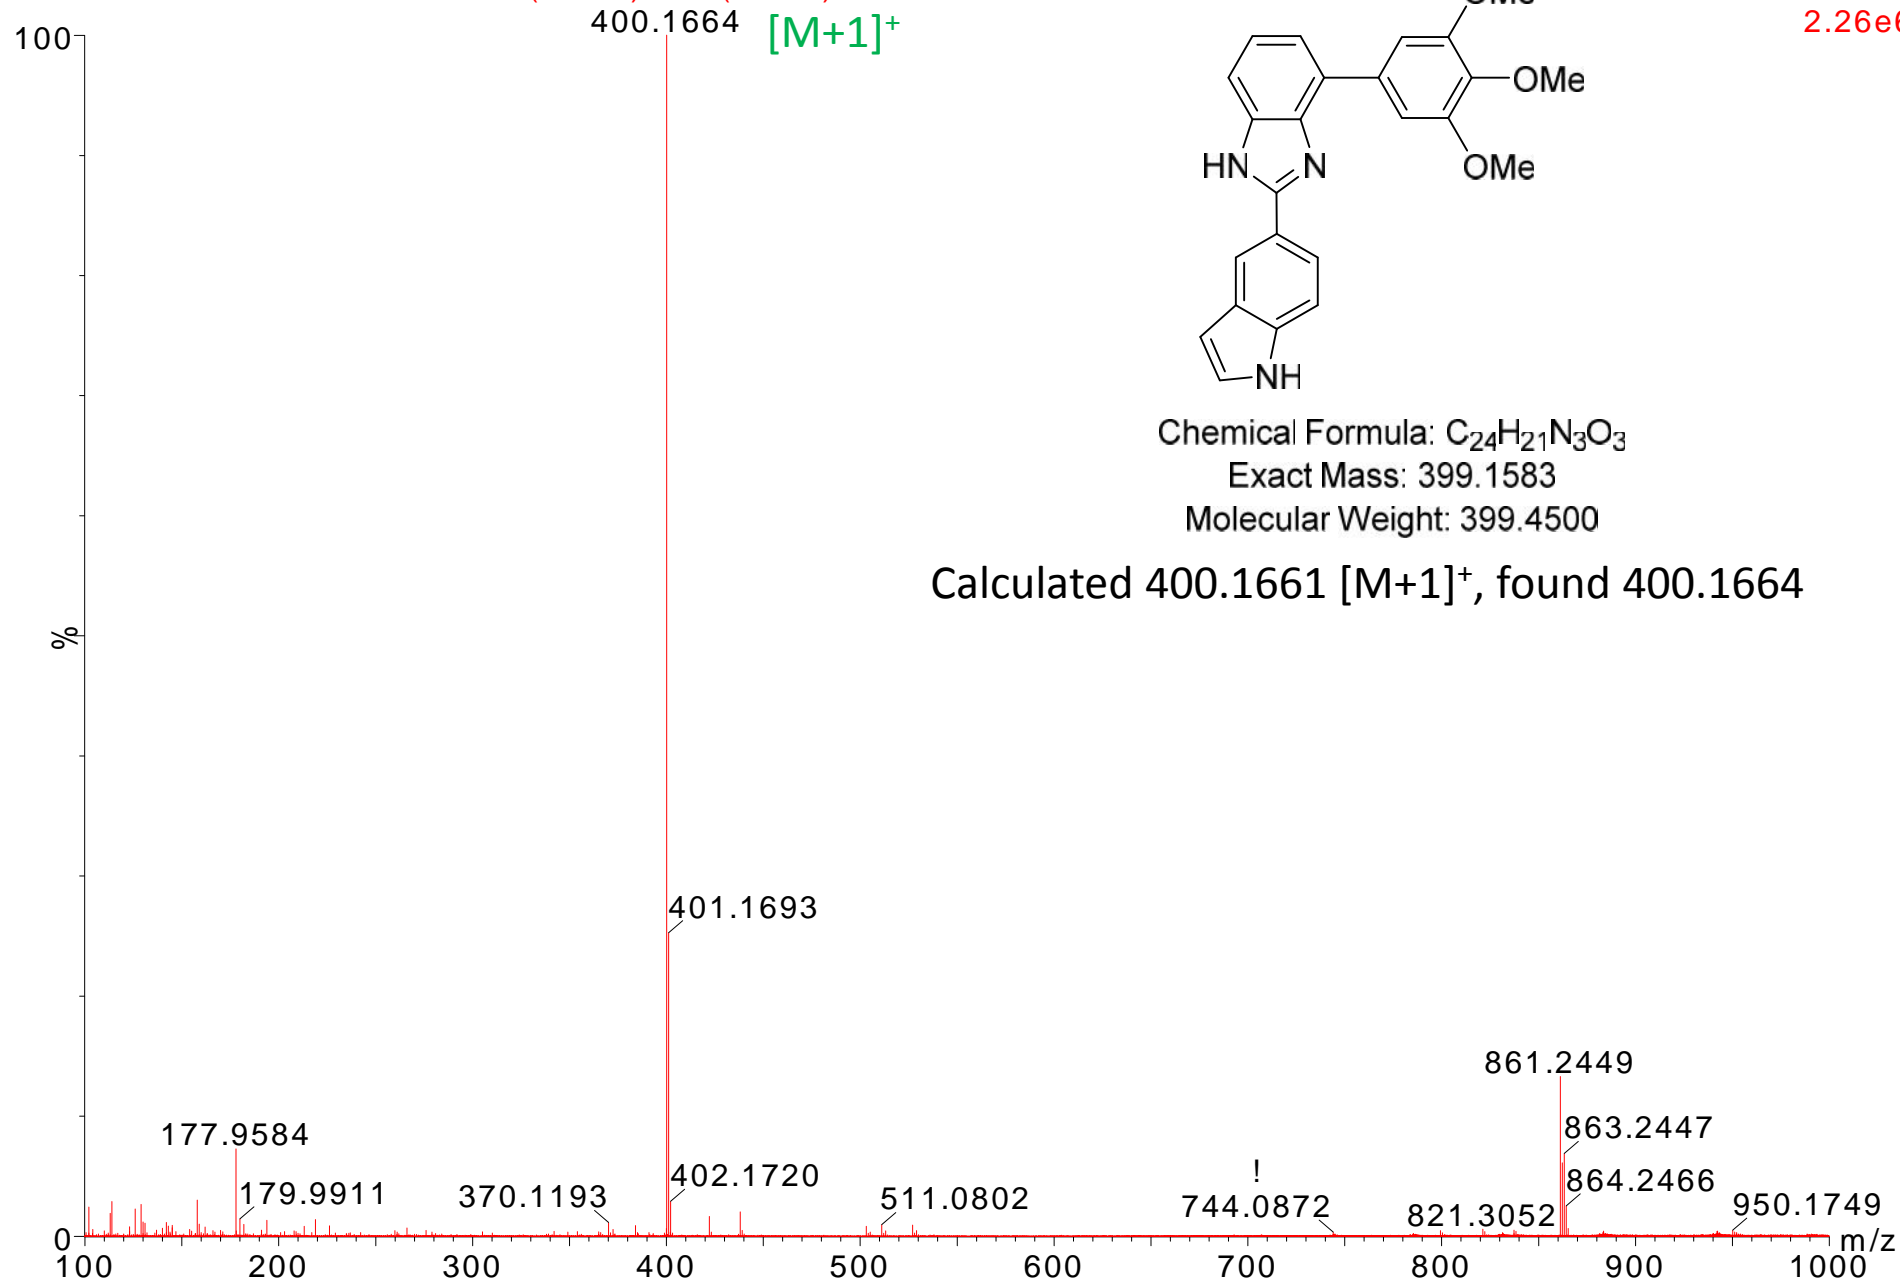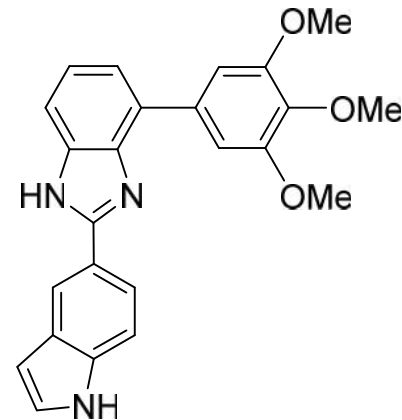

Chemical Formula: C<sub>24</sub>H<sub>21</sub>N<sub>3</sub>O<sub>3</sub>  
Exact Mass: 399.1583  
Molecular Weight: 399.4500

Calculated 400.1661 [M+1]<sup>+</sup>, found 400.1664

# Chromatogram of 4 (extracted at 400.1661)

treated

LY-3-286-120min-Dec3-2013-3

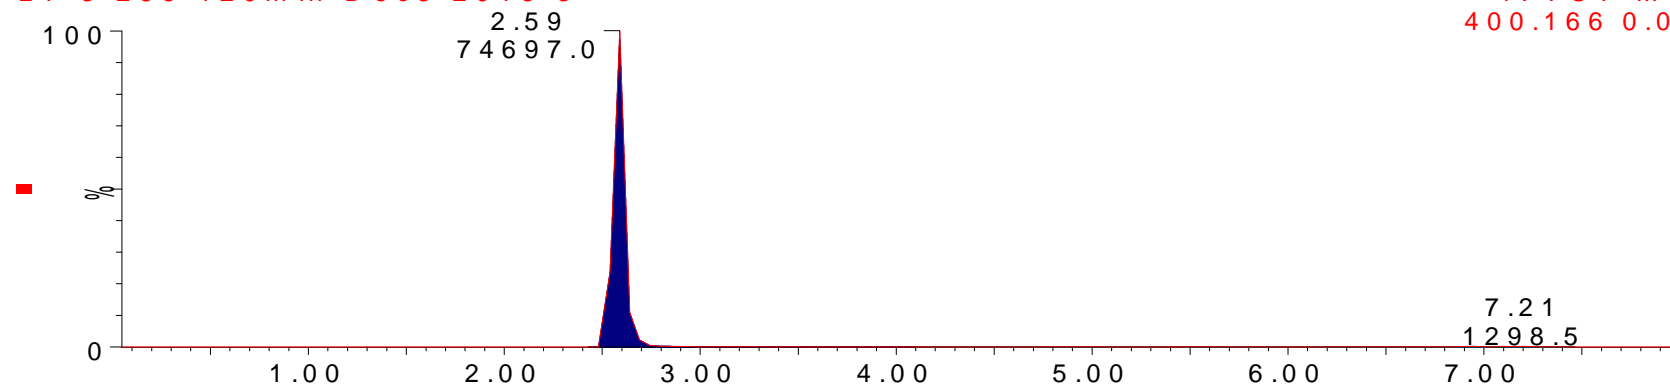

1: TOF MS ES+  
400.166 0.0100Da  
1.05e6  
Area

LY-3-286-30min-Dec3-2013-3

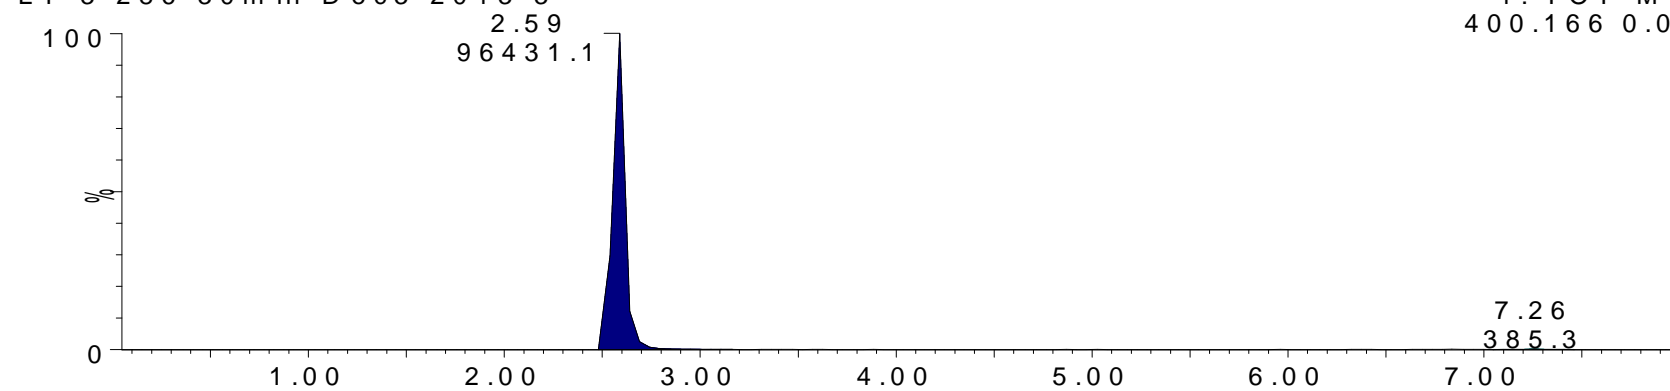

1: TOF MS ES+  
400.166 0.0100Da  
1.29e6  
Area

LY-3-286-0min-Dec3-2013-3

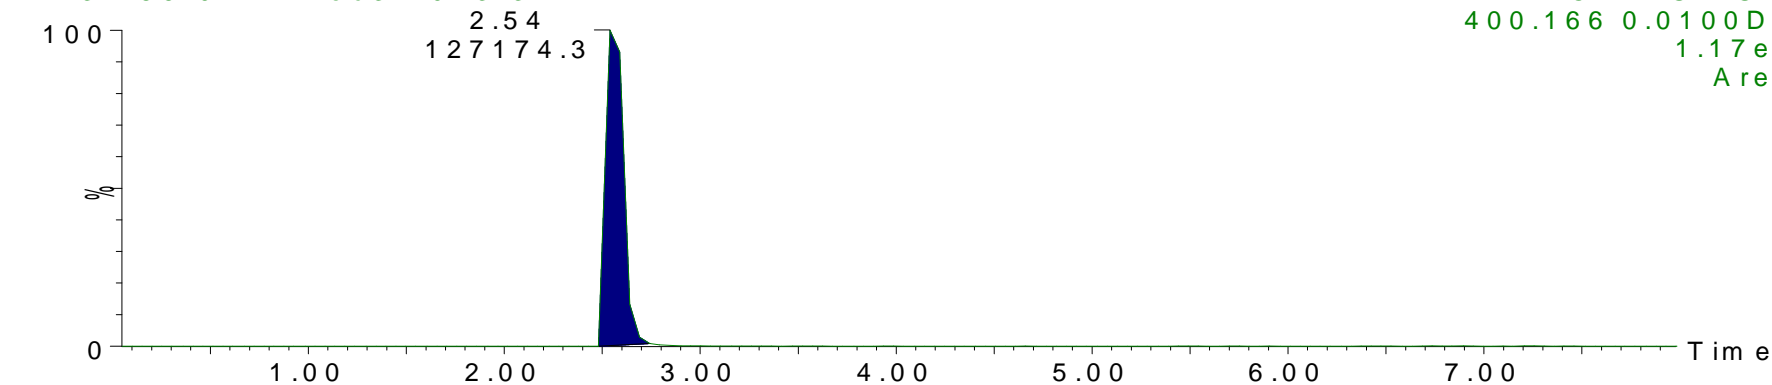

1: TOF MS ES+  
400.166 0.0100Da  
1.17e6  
Area

treated

LY-3-286-120min-Dec3-2013-3 43 (2.228) Cm (43)

# Mass spectrum of M9

1: TOF MS ES+  
1.68e4

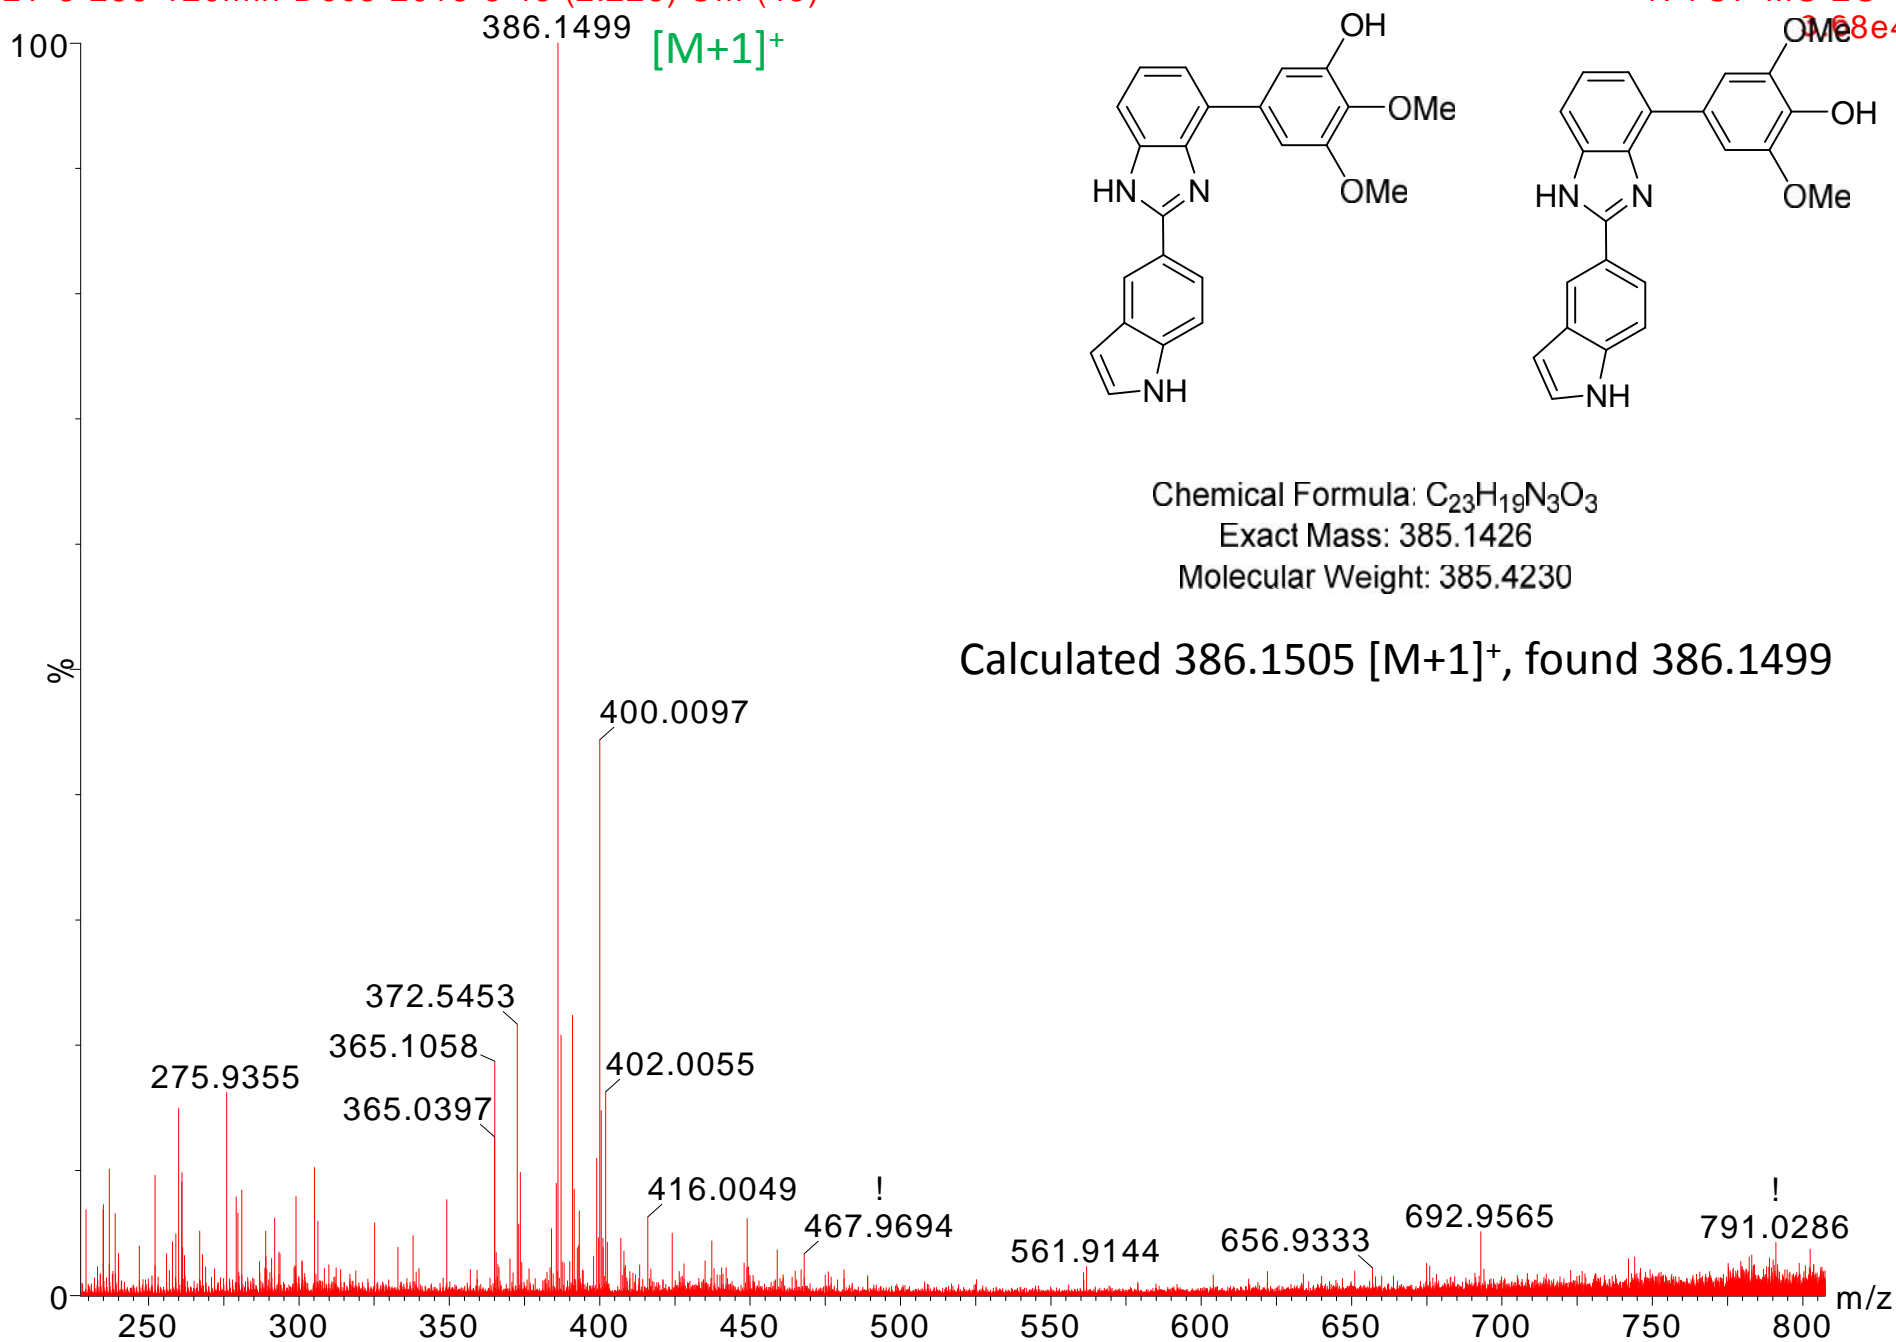



# Chromatogram of M9 (extracted at 386.1505)

treated

LY-3-286-120m in-Dec3-2013-3

1: TOF MS ES+  
386.151 0.0100Da  
3.68e4

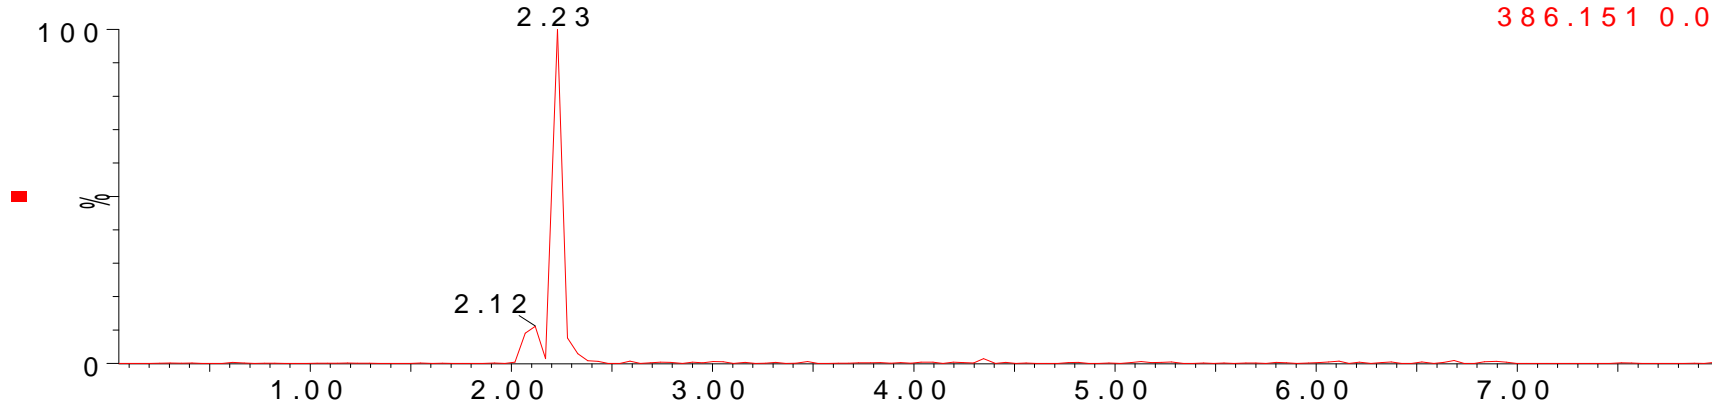

LY-3-286-30m in-Dec3-2013-3

1: TOF MS ES+  
386.151 0.0100Da  
1.01e4

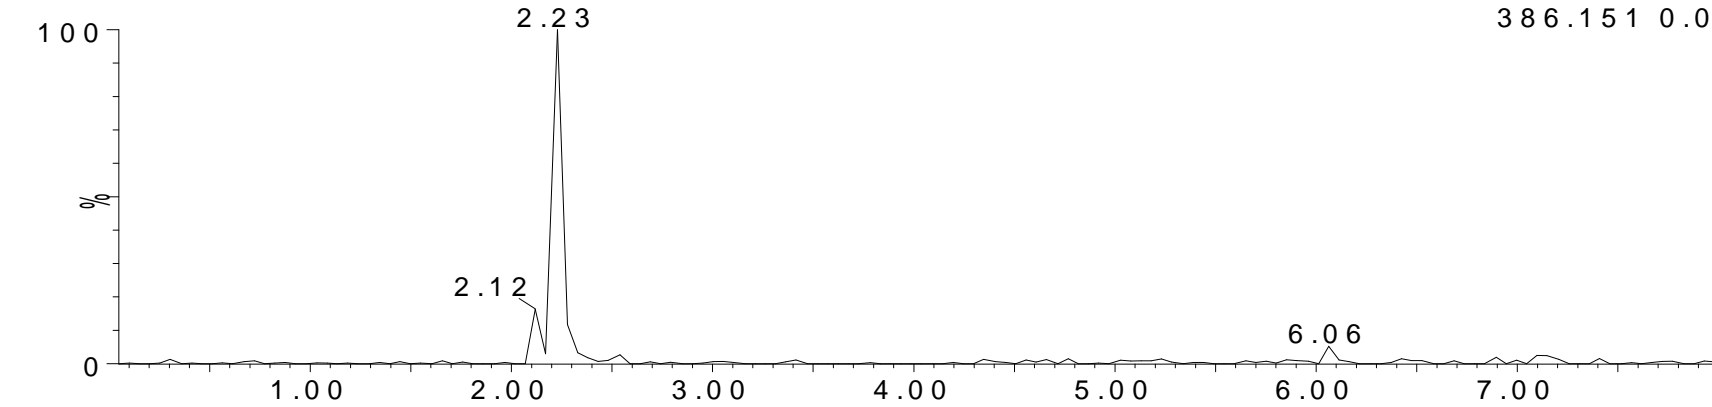

LY-3-286-0m in-Dec3-2013-3

1: TOF MS ES+  
386.151 0.0100Da  
308

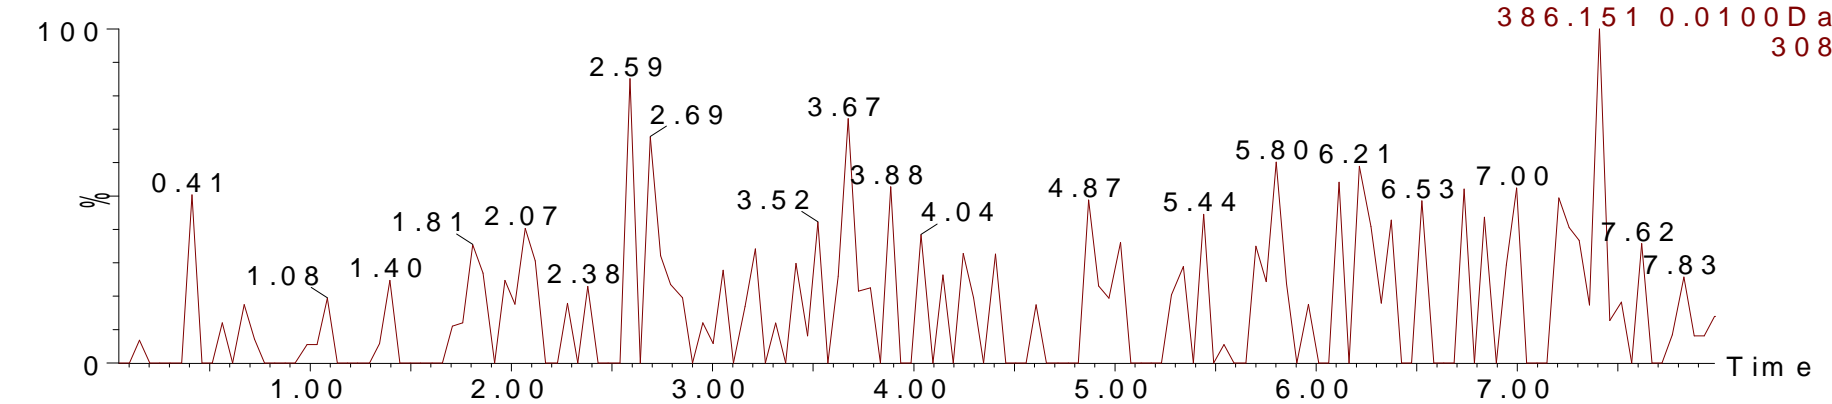

# Mass spectrum of M10

treated

LY-3-286-120min-Dec3-2013-3 50 (2.590) Cm (50)

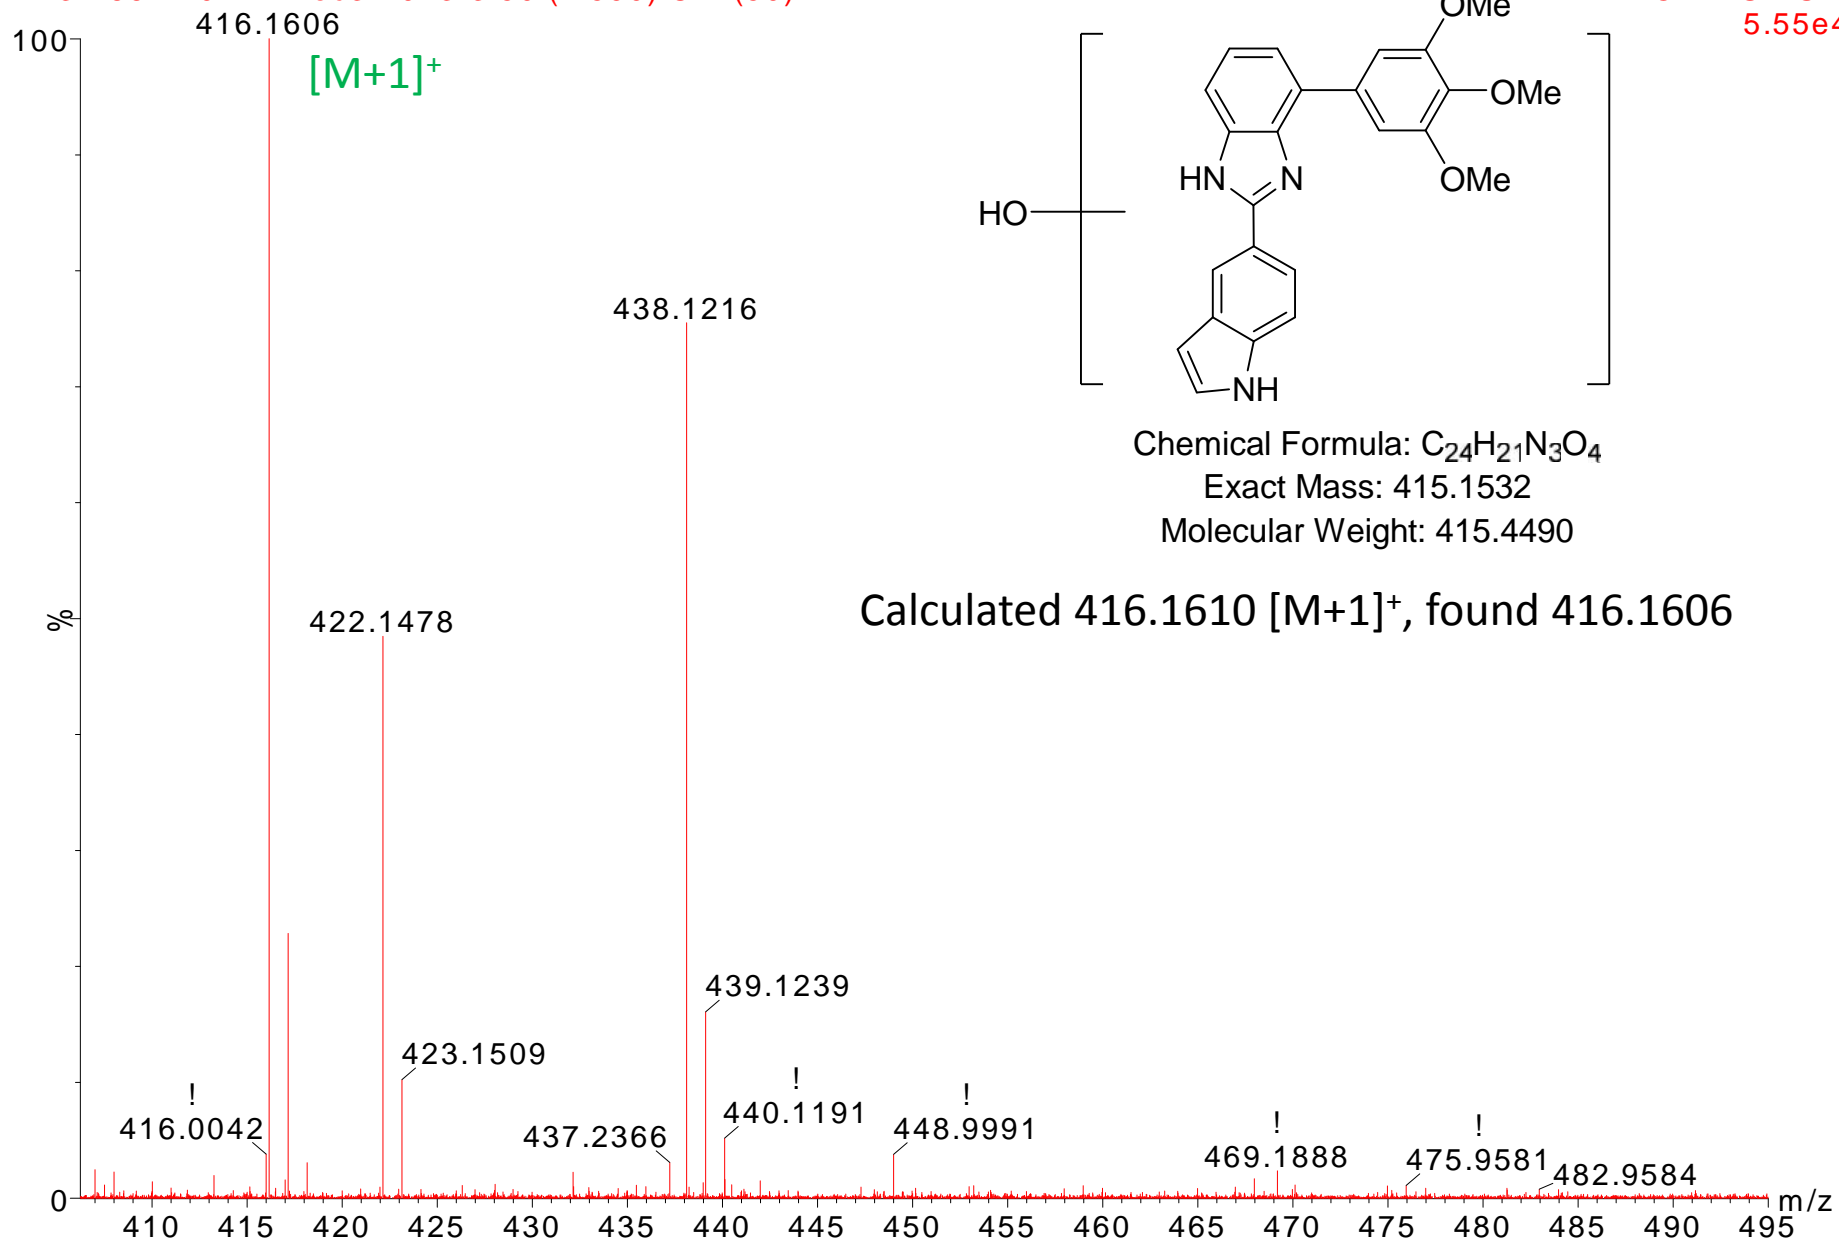

# Chromatogram of M10 (extracted at 416.1610)

treated

LY-3-286-120 min-Dec3-2013-3

1: TOF MS ES+  
416.161 0.0100 Da  
5.55e4

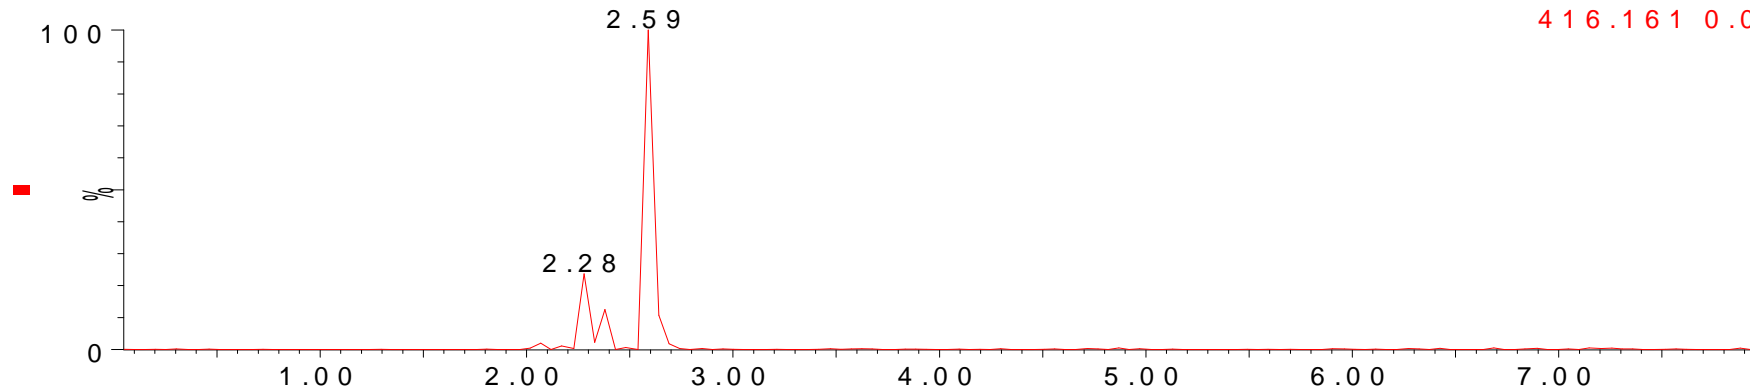

LY-3-286-30 min-Dec3-2013-3

1: TOF MS ES+  
416.161 0.0100 Da  
1.90e4

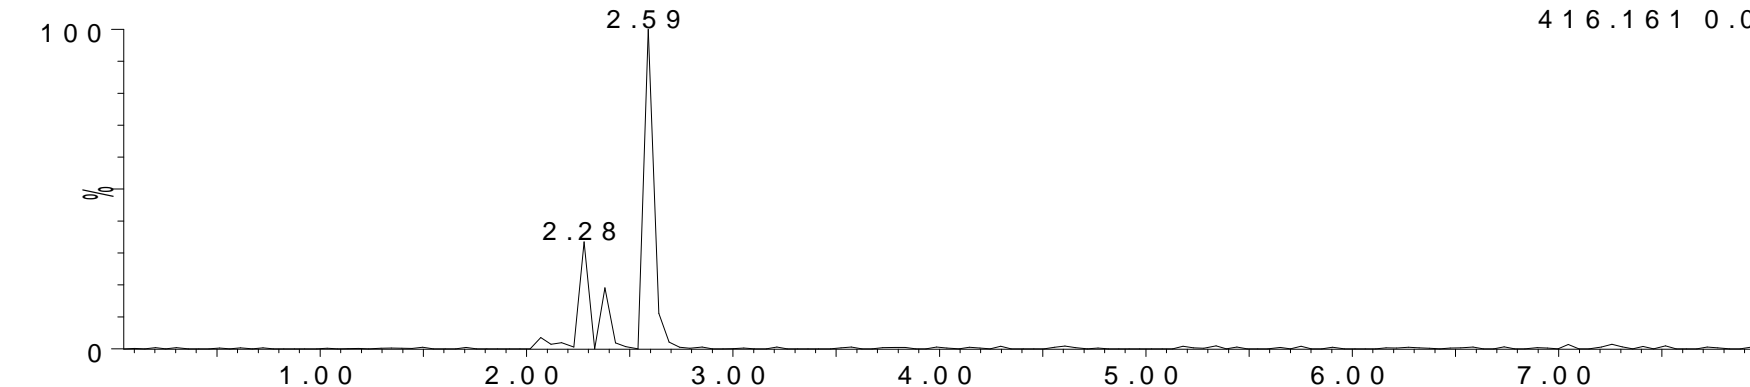

LY-3-286-0 min-Dec3-2013-3

1: TOF MS ES+  
416.161 0.0100 Da  
234

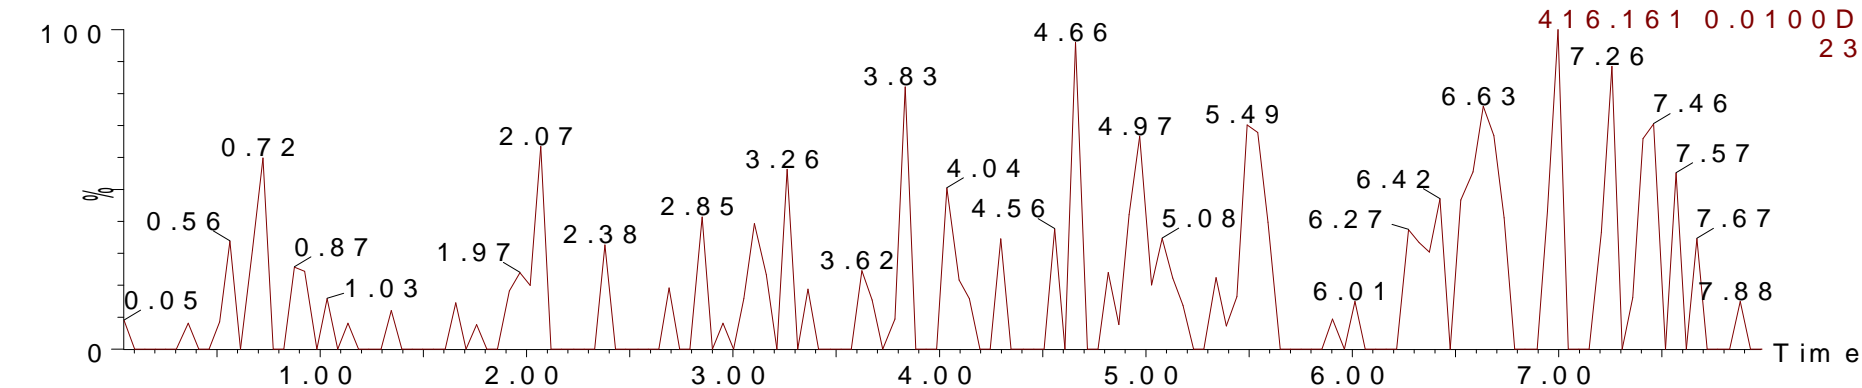

# Mass spectrum of 7

treated

LY-3-296-0min-Dec3-2013-3 42 (2.170) Cm (42:43)

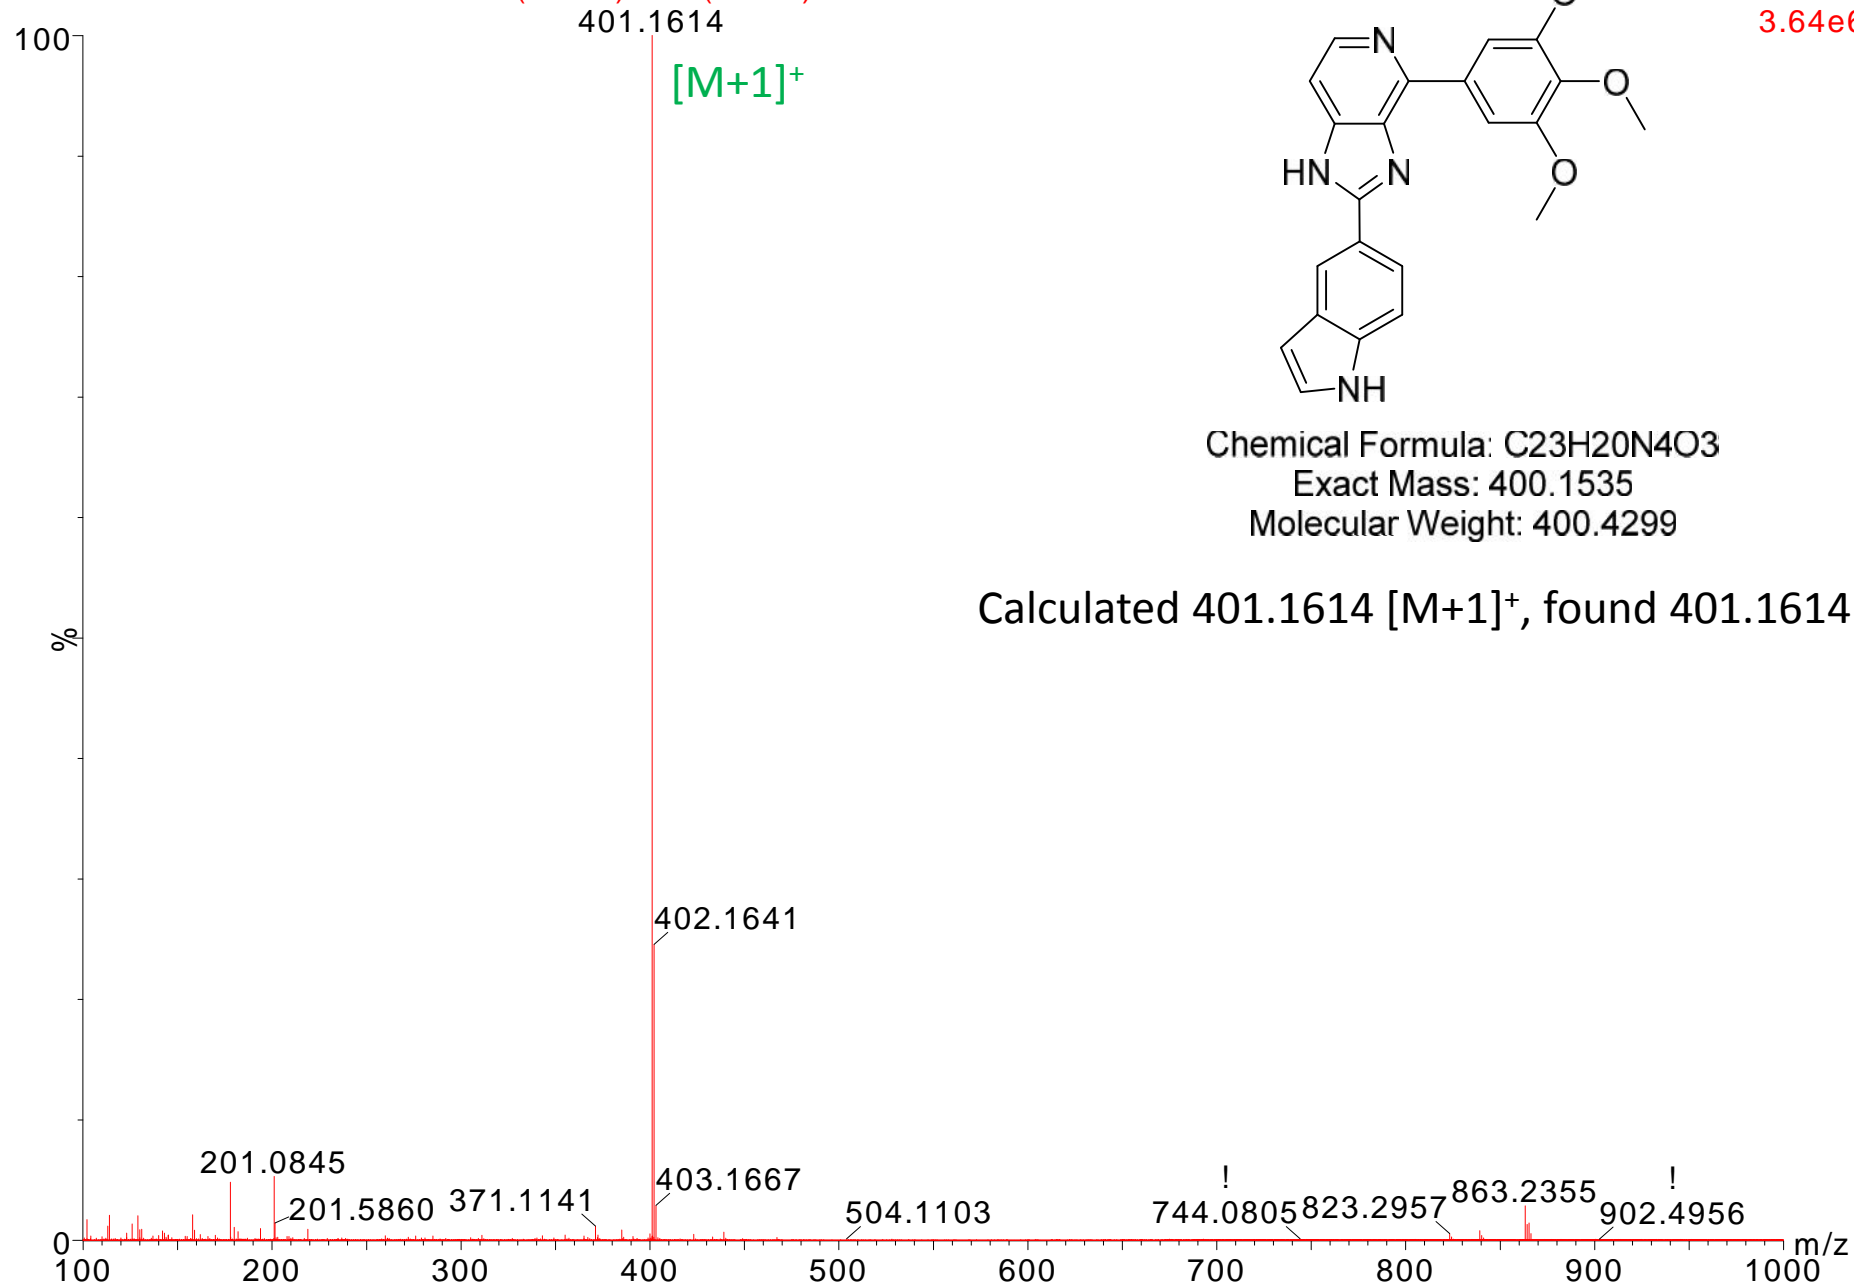

# Chromatogram of 7 (extracted at 401.1614)

treated

LY-3-296-120 min-Dec3-2013-3

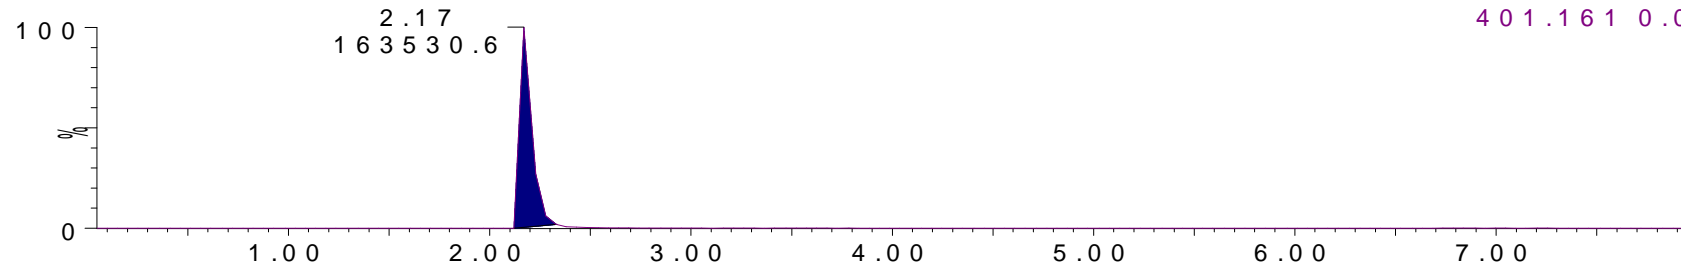

1: TOF MS ES+  
401.161 0.0100 Da  
2.31e6  
Area

LY-3-296-60 min-Dec3-2013-3

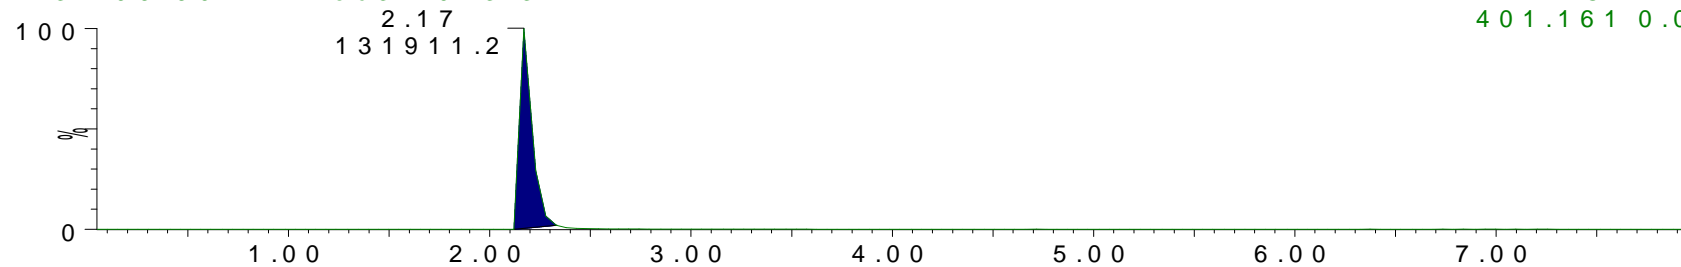

1: TOF MS ES+  
401.161 0.0100 Da  
1.83e6  
Area

LY-3-296-30 min-Dec3-2013-3

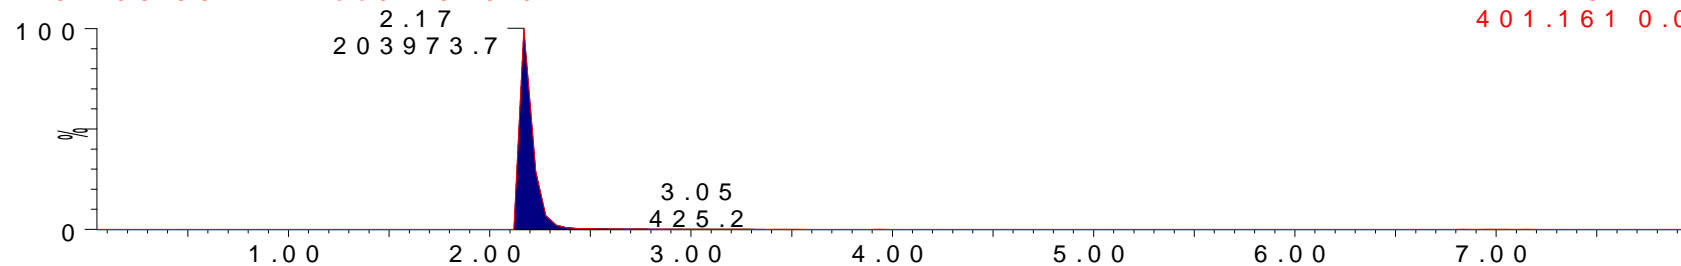

1: TOF MS ES+  
401.161 0.0100 Da  
2.68e6  
Area

LY-3-296-0 min-Dec3-2013-3

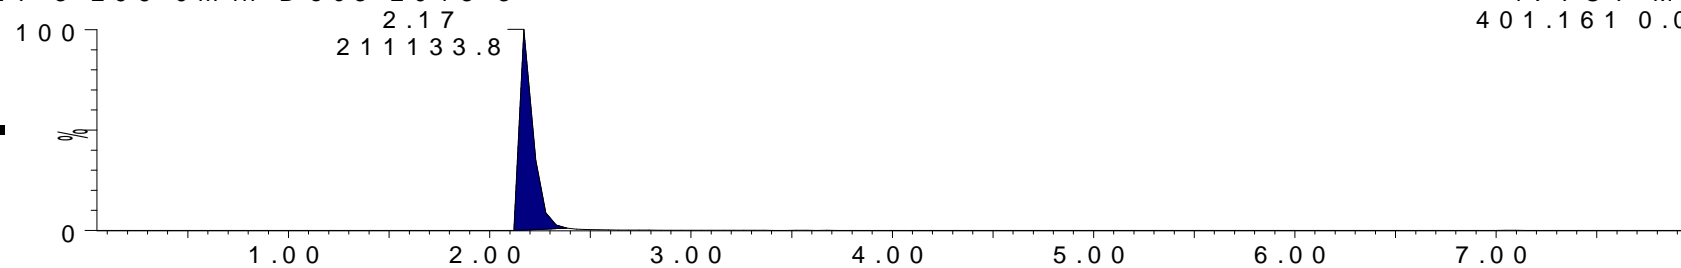

1: TOF MS ES+  
401.161 0.0100 Da  
2.70e6  
Area

# Mass spectrum of M11

treated

LY-3-296-120min-Dec3-2013-3 18 (0.925) Cm (18)

1: TOF MS ES+  
8.81e3

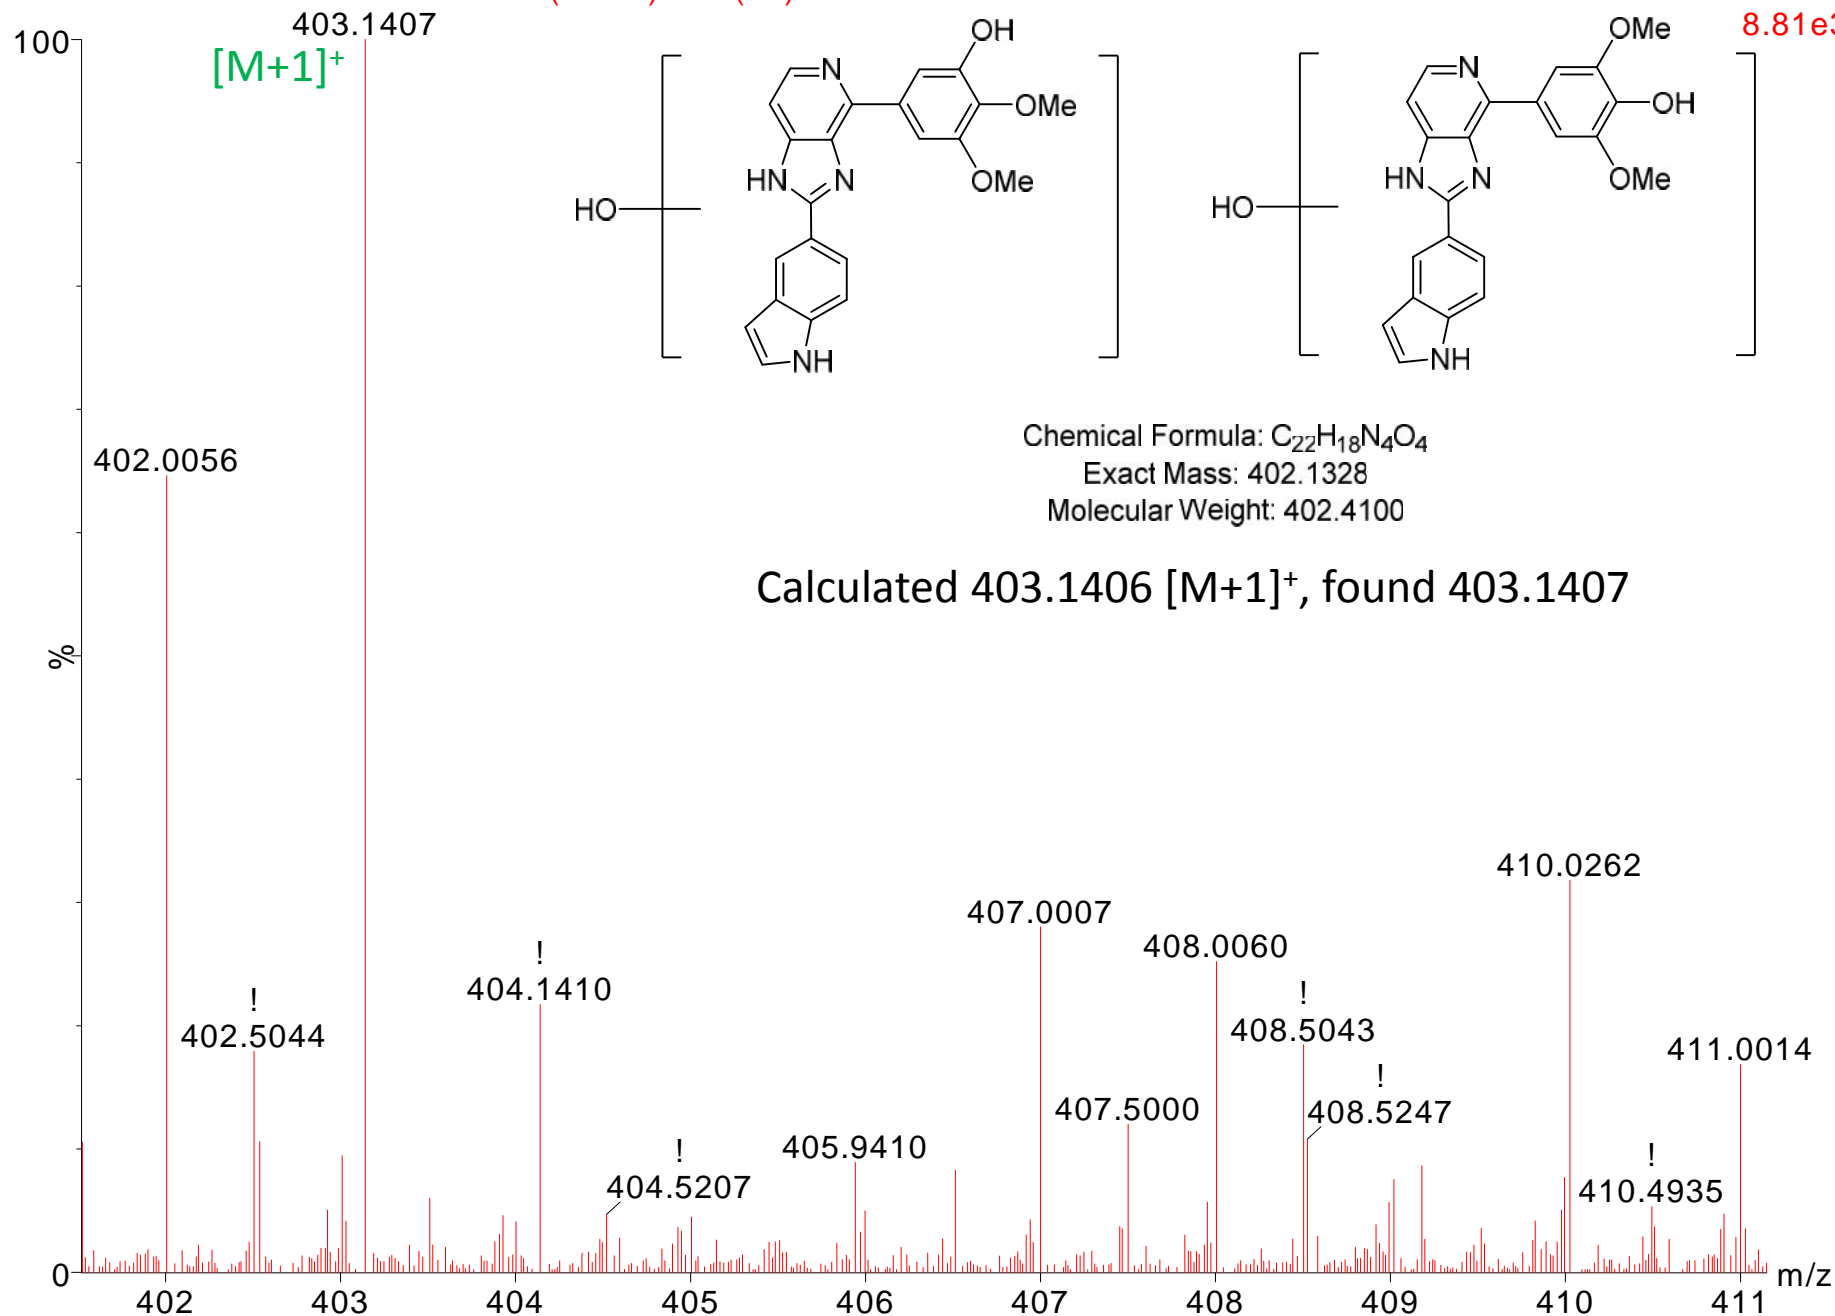

# Chromatogram of M11 (extracted at 403.1406)

treated

LY-3-296-120min-Dec3-2013-3

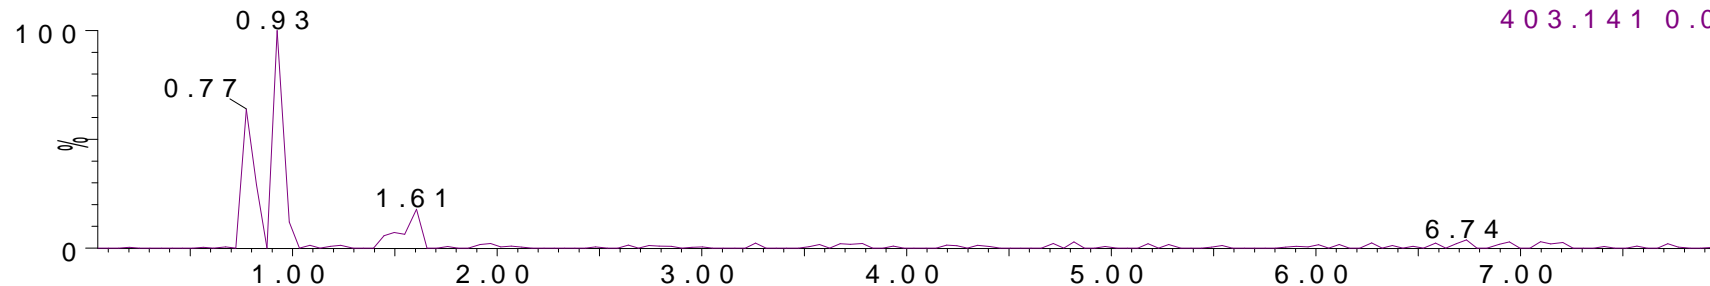

LY-3-296-60min-Dec3-2013-3

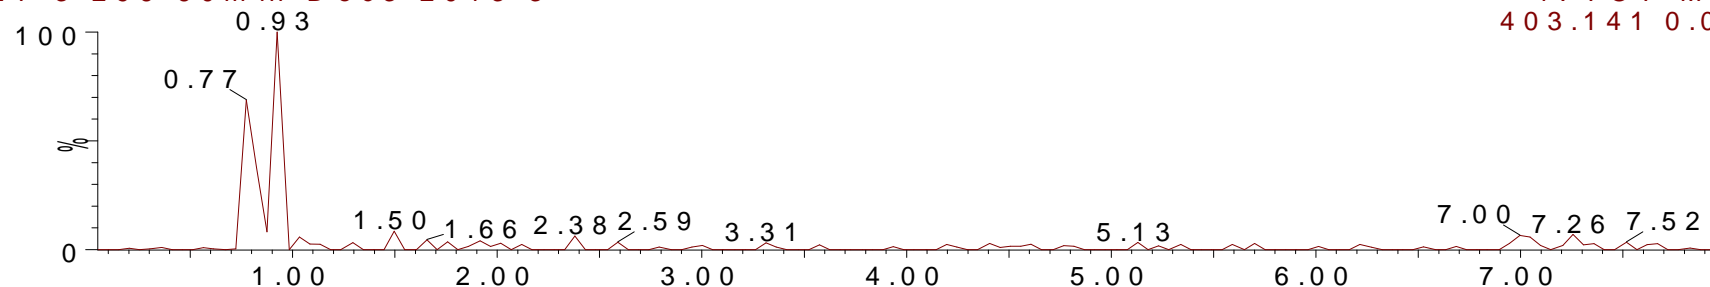

LY-3-296-30min-Dec3-2013-3

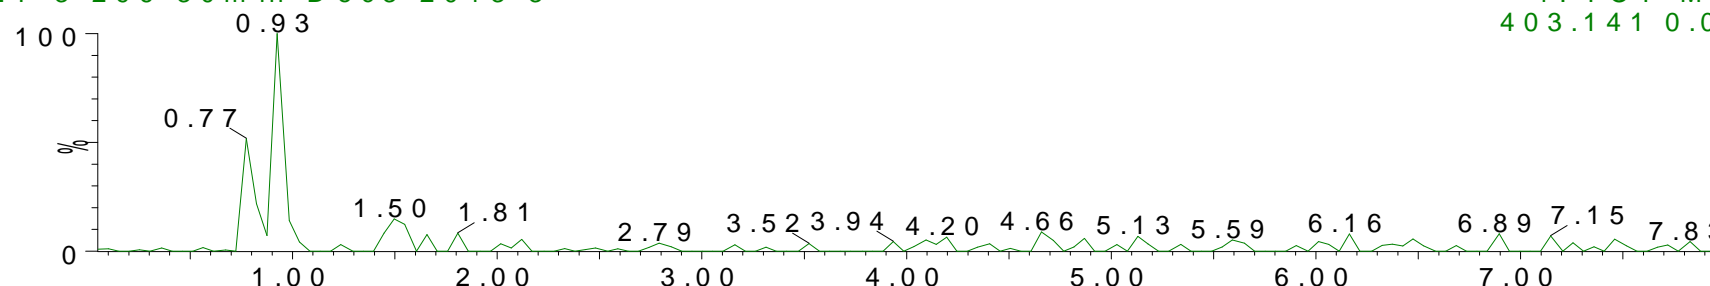

LY-3-296-0min-Dec3-2013-3

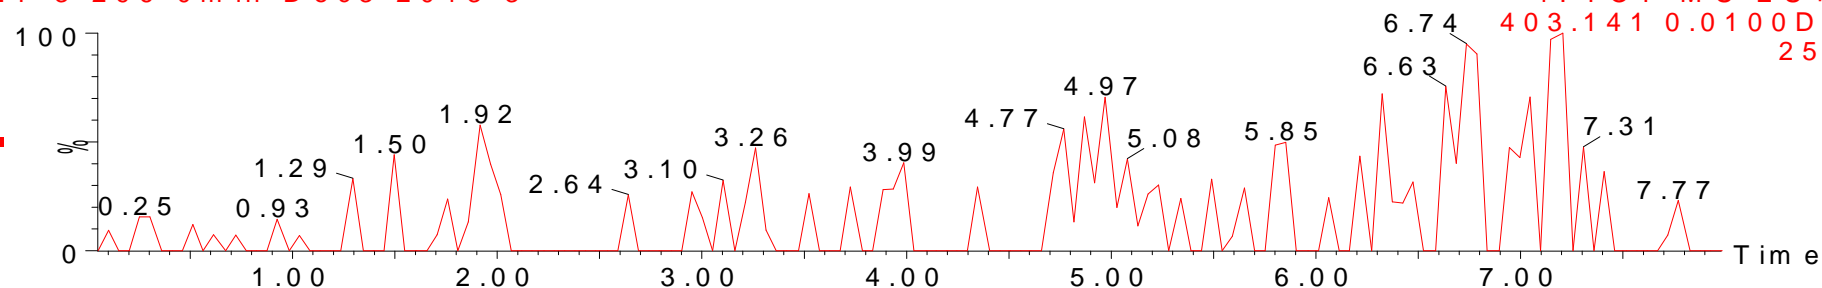

# Mass spectrum of M12

treated

LY-3-296-120min-Dec3-2013-3 32 (1.656) Cm (32)

$[M+1]^+$   
387.1458

1: TOF MS ES+  
7.50e4

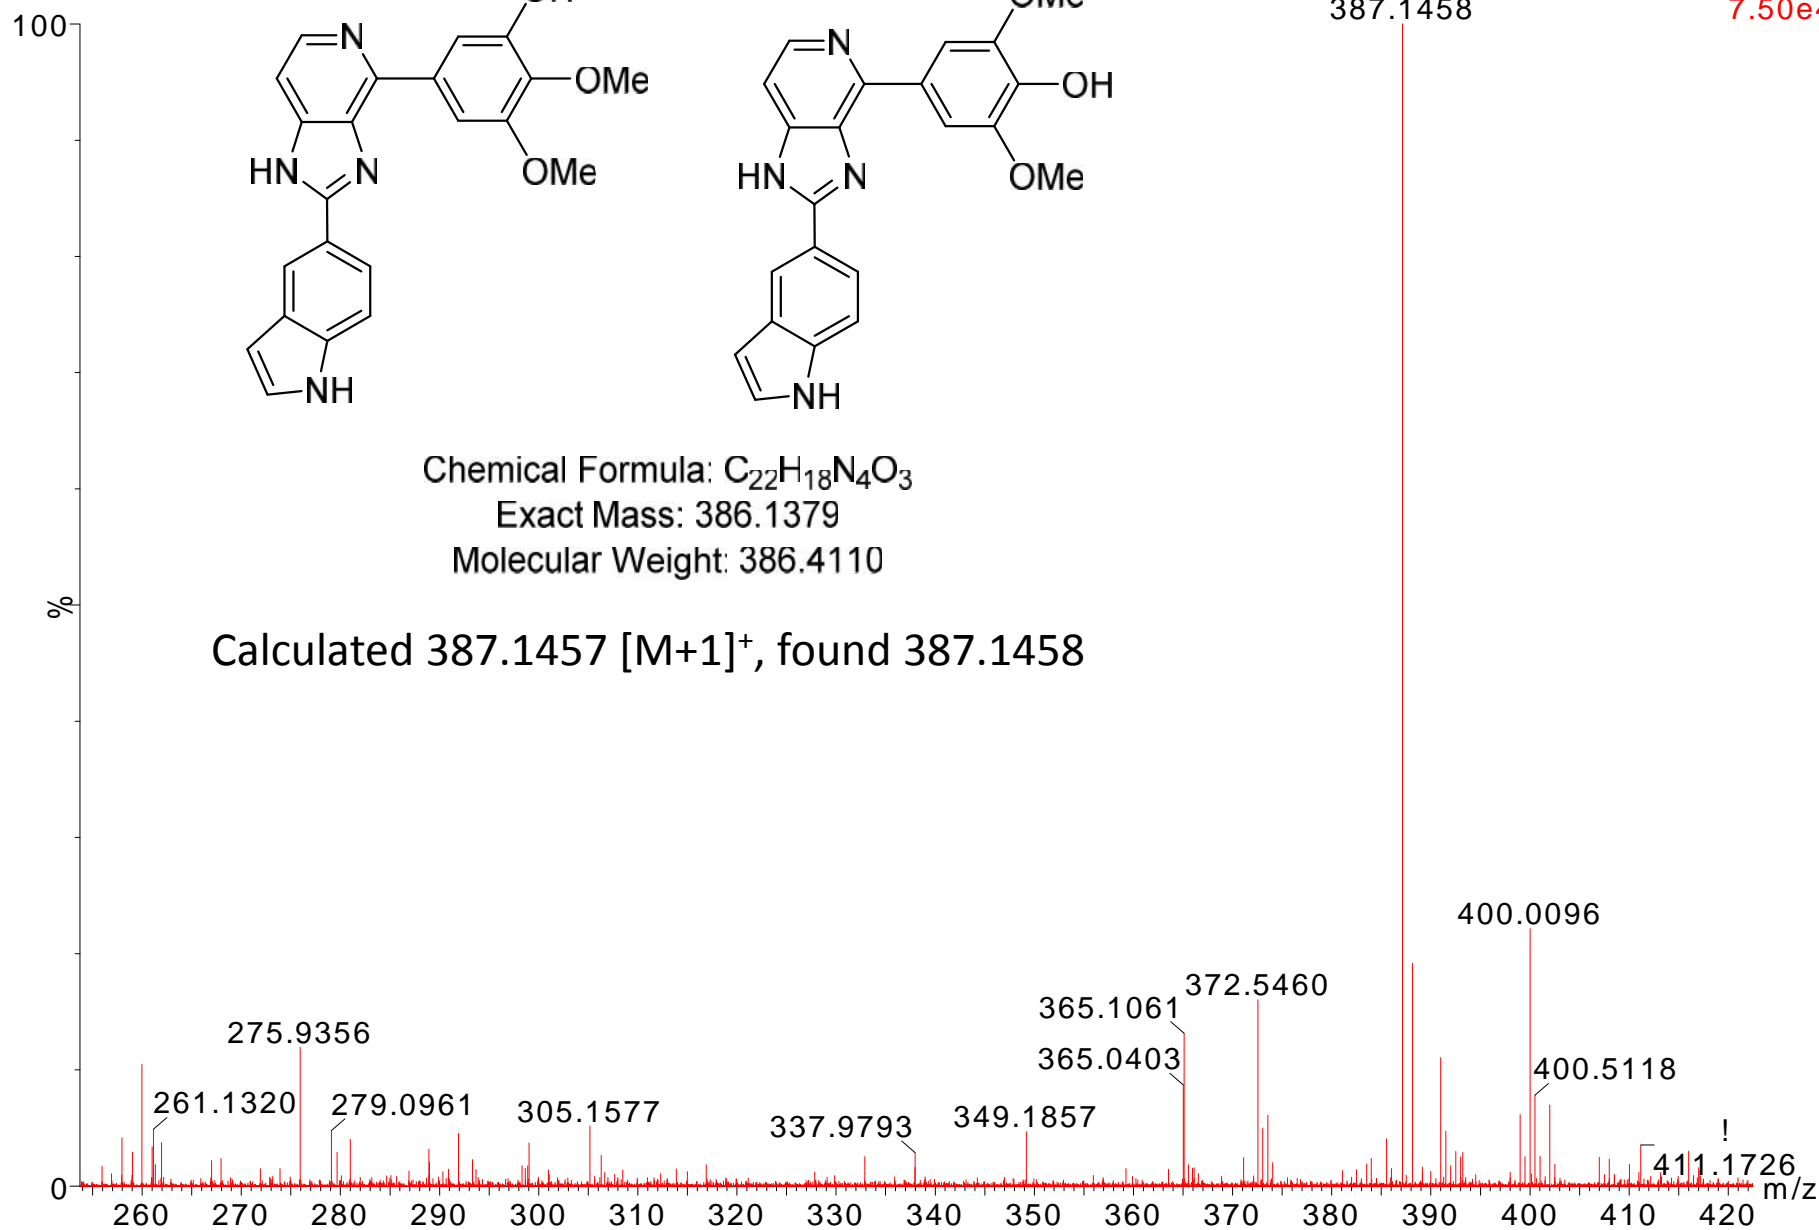



# Chromatogram of M12 (extracted at 387.1457)

treated

LY-3-296-120m in-Dec3-2013-3

1: TOF MS ES+  
387.146 0.0100Da  
7.50e4

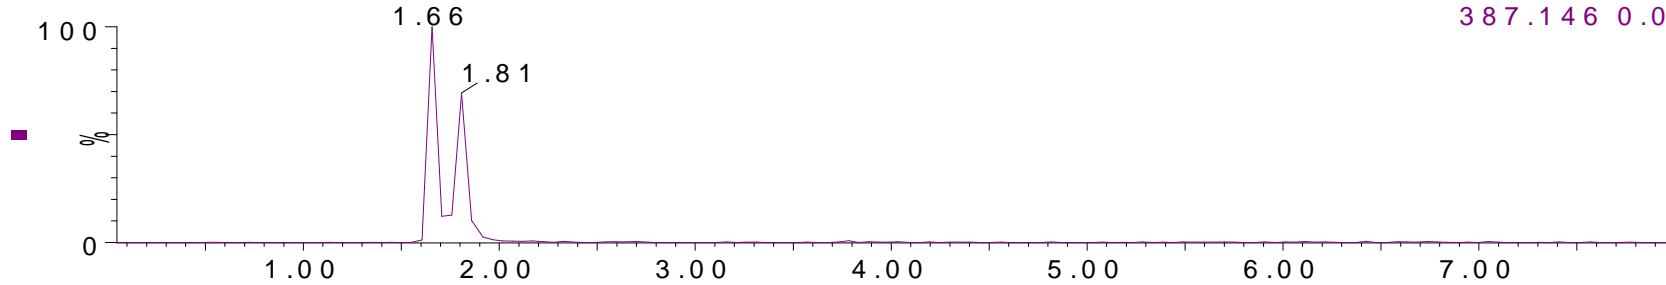

LY-3-296-60m in-Dec3-2013-3

1: TOF MS ES+  
387.146 0.0100Da  
5.03e4

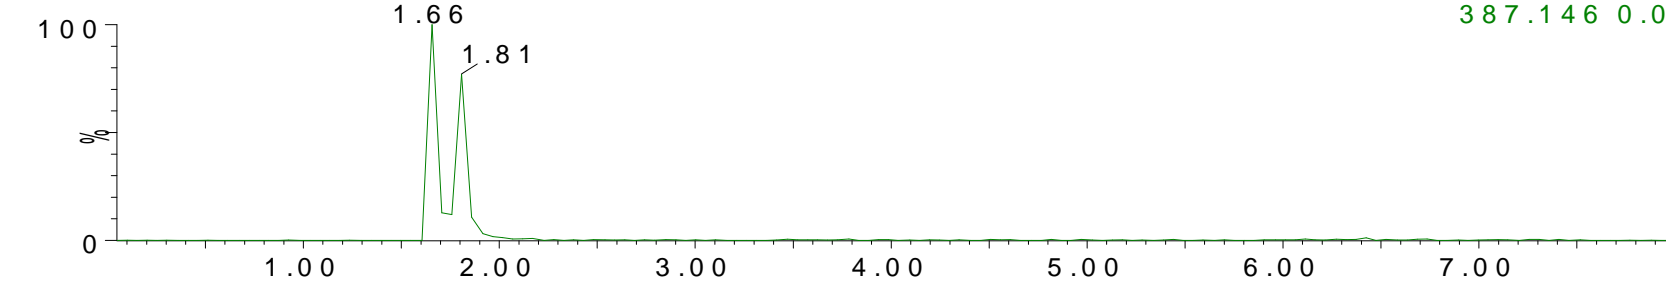

LY-3-296-30m in-Dec3-2013-3

1: TOF MS ES+  
387.146 0.0100Da  
5.46e4

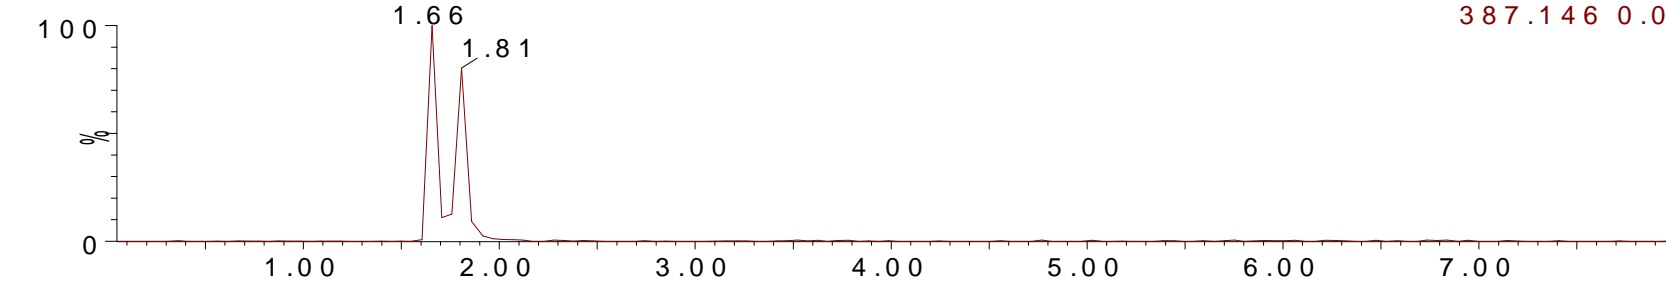

LY-3-296-0m in-Dec3-2013-3

1: TOF MS ES+  
387.146 0.0100Da  
1.85e3

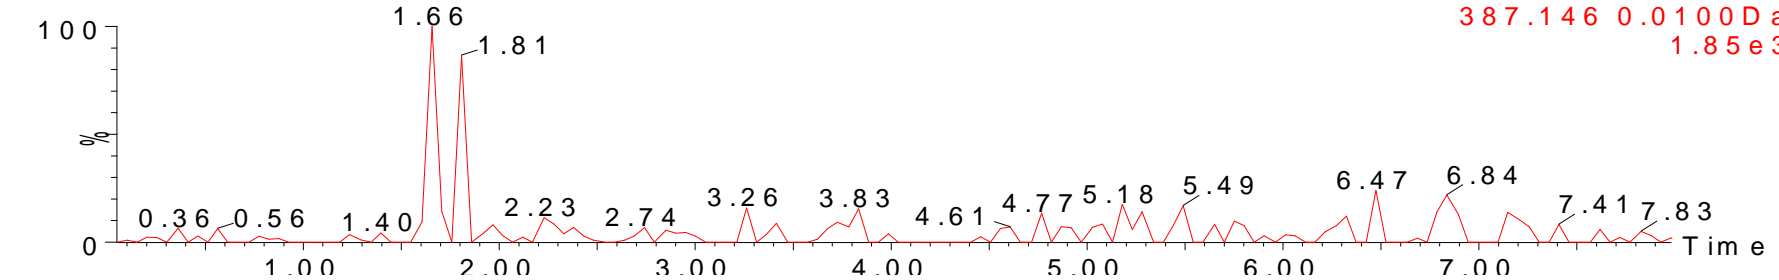

# Mass spectrum of M13

treated

LY-3-296-60min-Dec3-2013-3 21 (1.085) Cm (21:22)

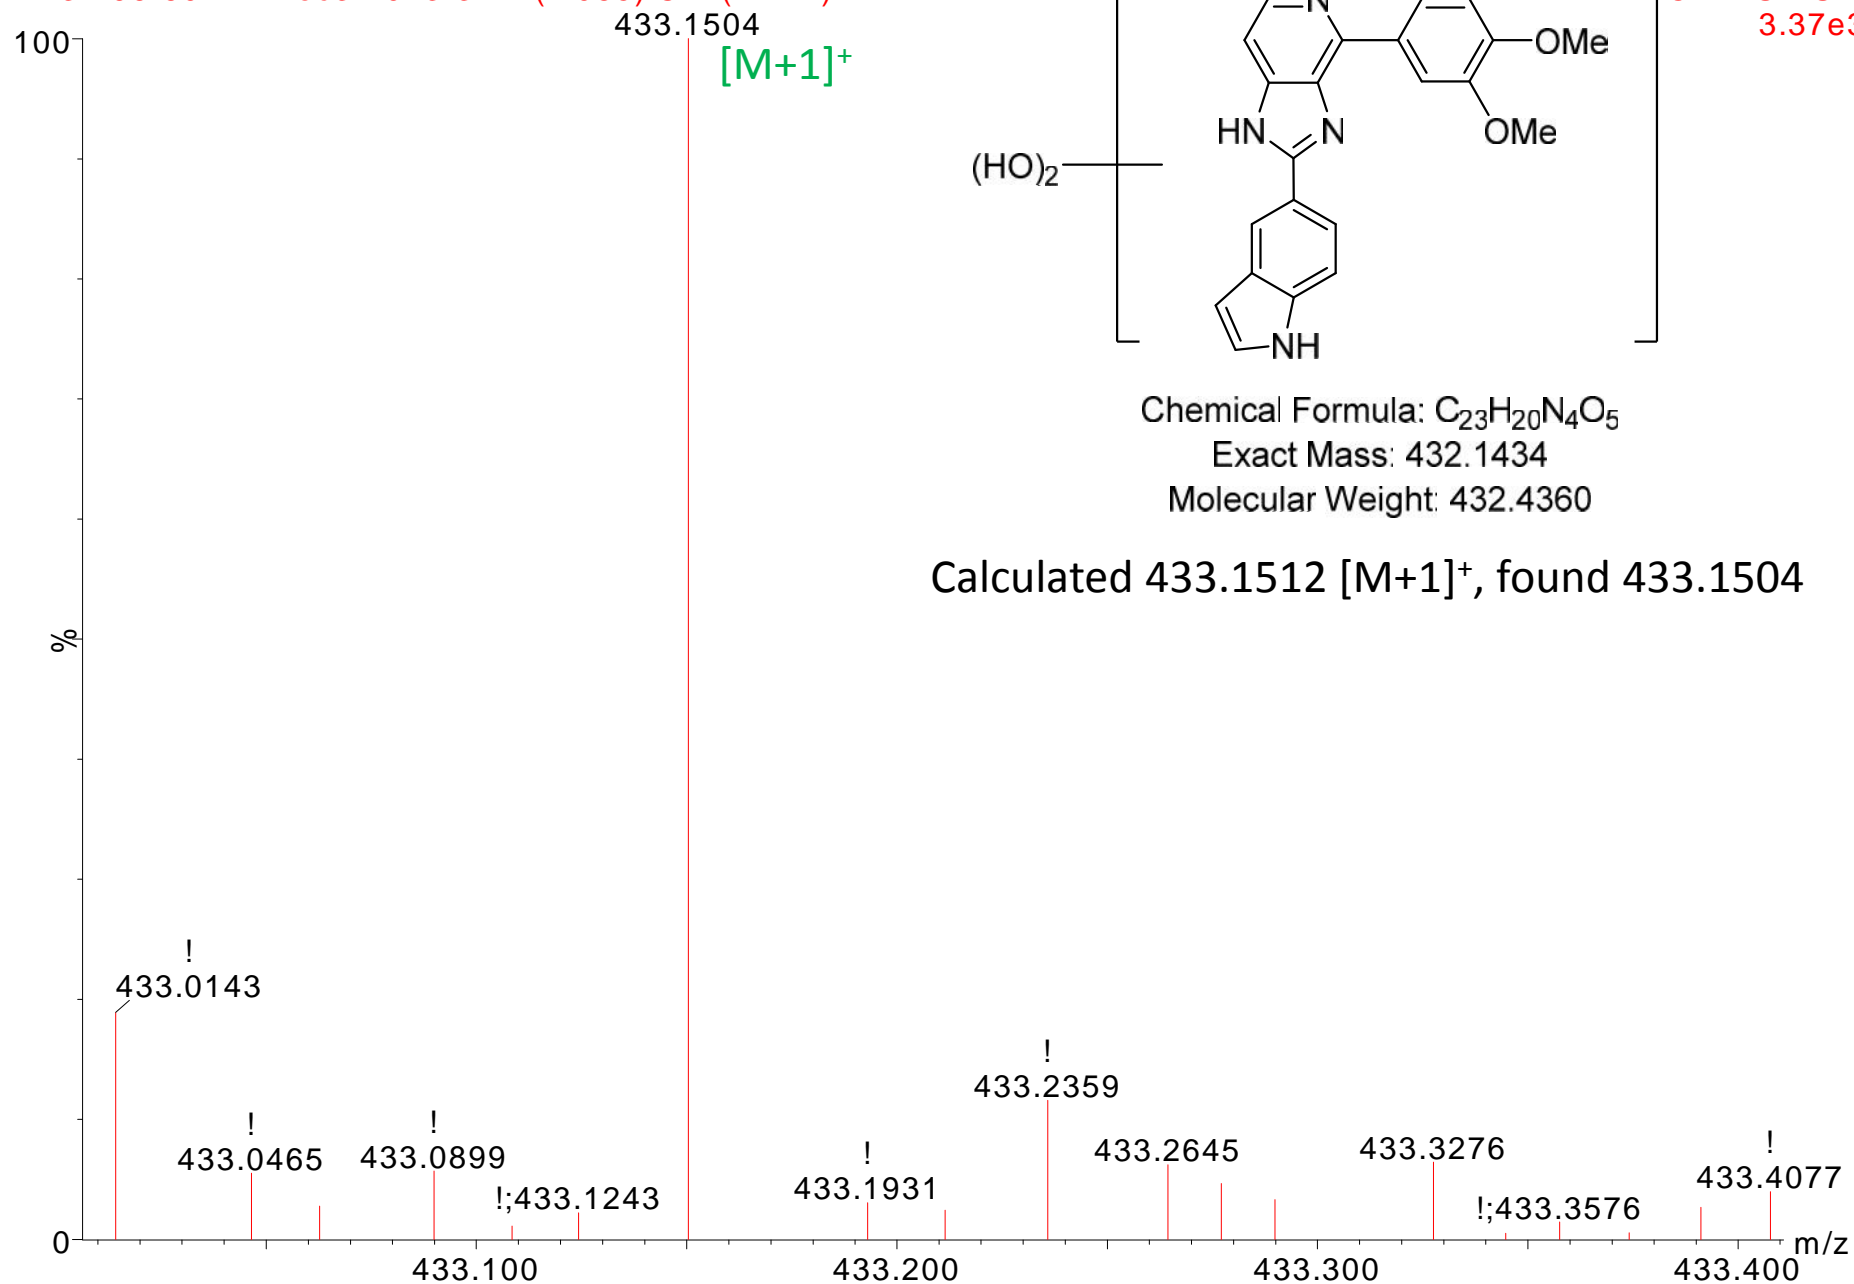

# Chromatogram of M13 (extracted at 433.1512)

treated

LY-3-296-120min-Dec3-2013-3

1: TOF MS ES+  
433.151 0.0100 Da  
5.41e3

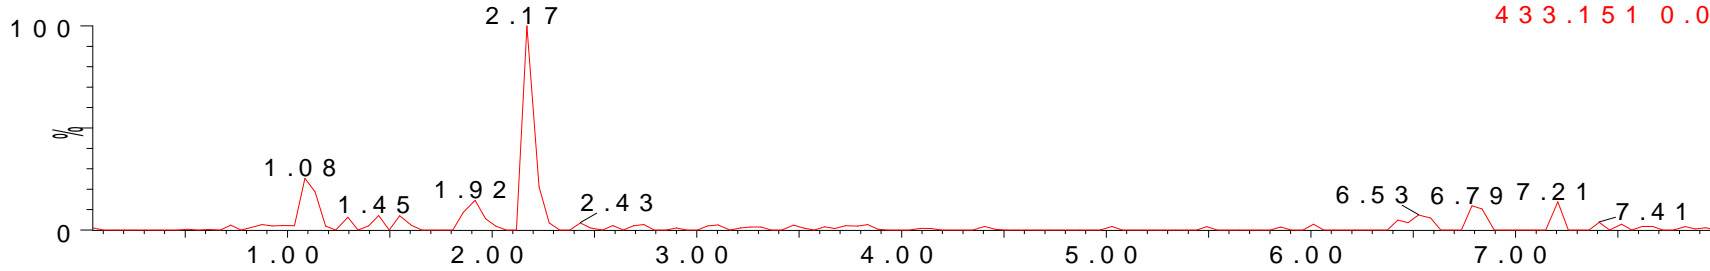

LY-3-296-60min-Dec3-2013-3

1: TOF MS ES+  
433.151 0.0100 Da  
3.31e3

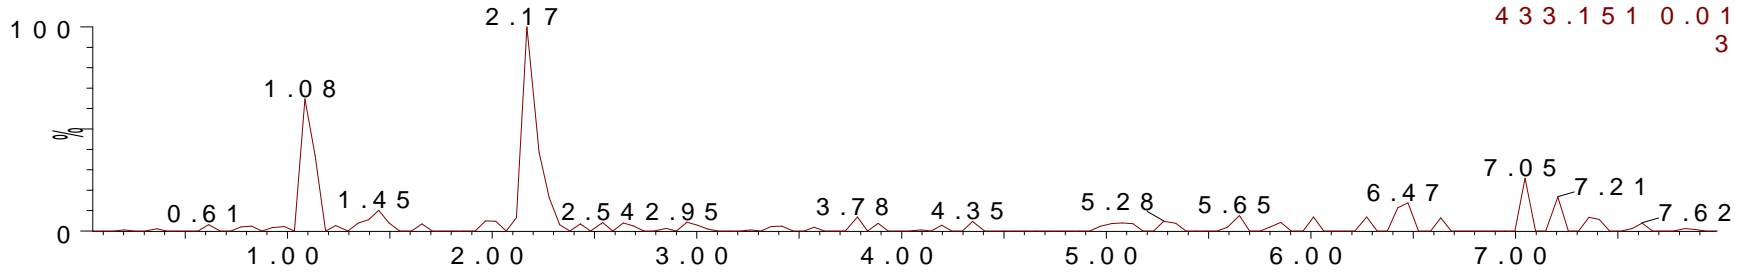

LY-3-296-30min-Dec3-2013-3

1: TOF MS ES+  
433.151 0.0100 Da  
5.90e3

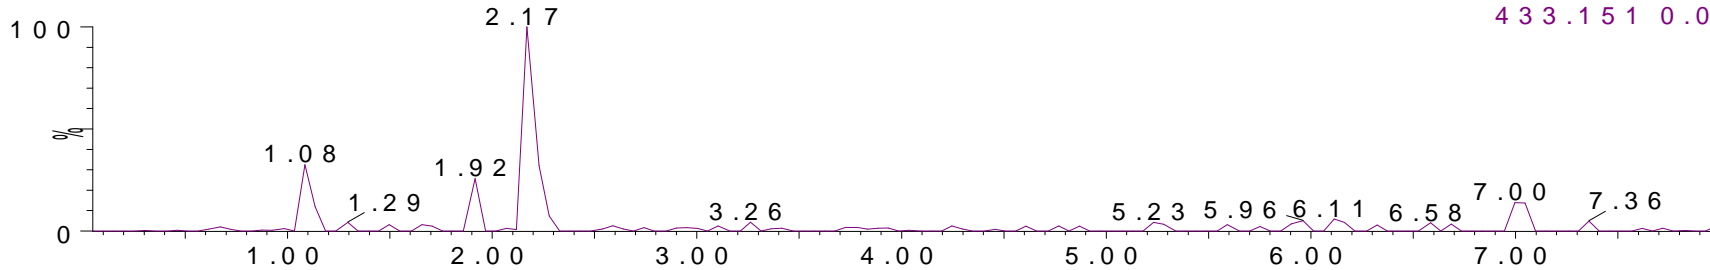

LY-3-296-0min-Dec3-2013-3

1: TOF MS ES+  
433.151 0.0100 Da  
7.88e3

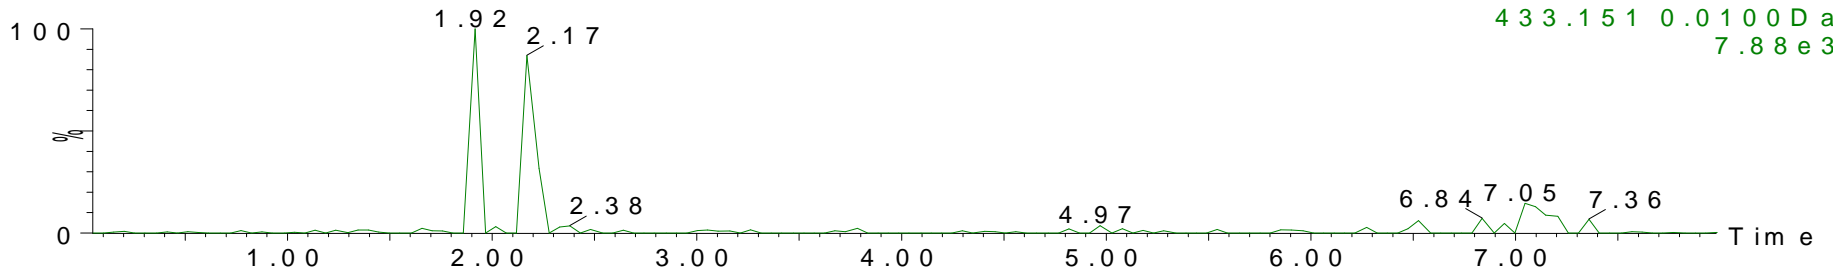

# Mass spectrum of M14

treated

LY-3-296-120min-Dec3-2013-3 28 (1.446) Cm (28:29)

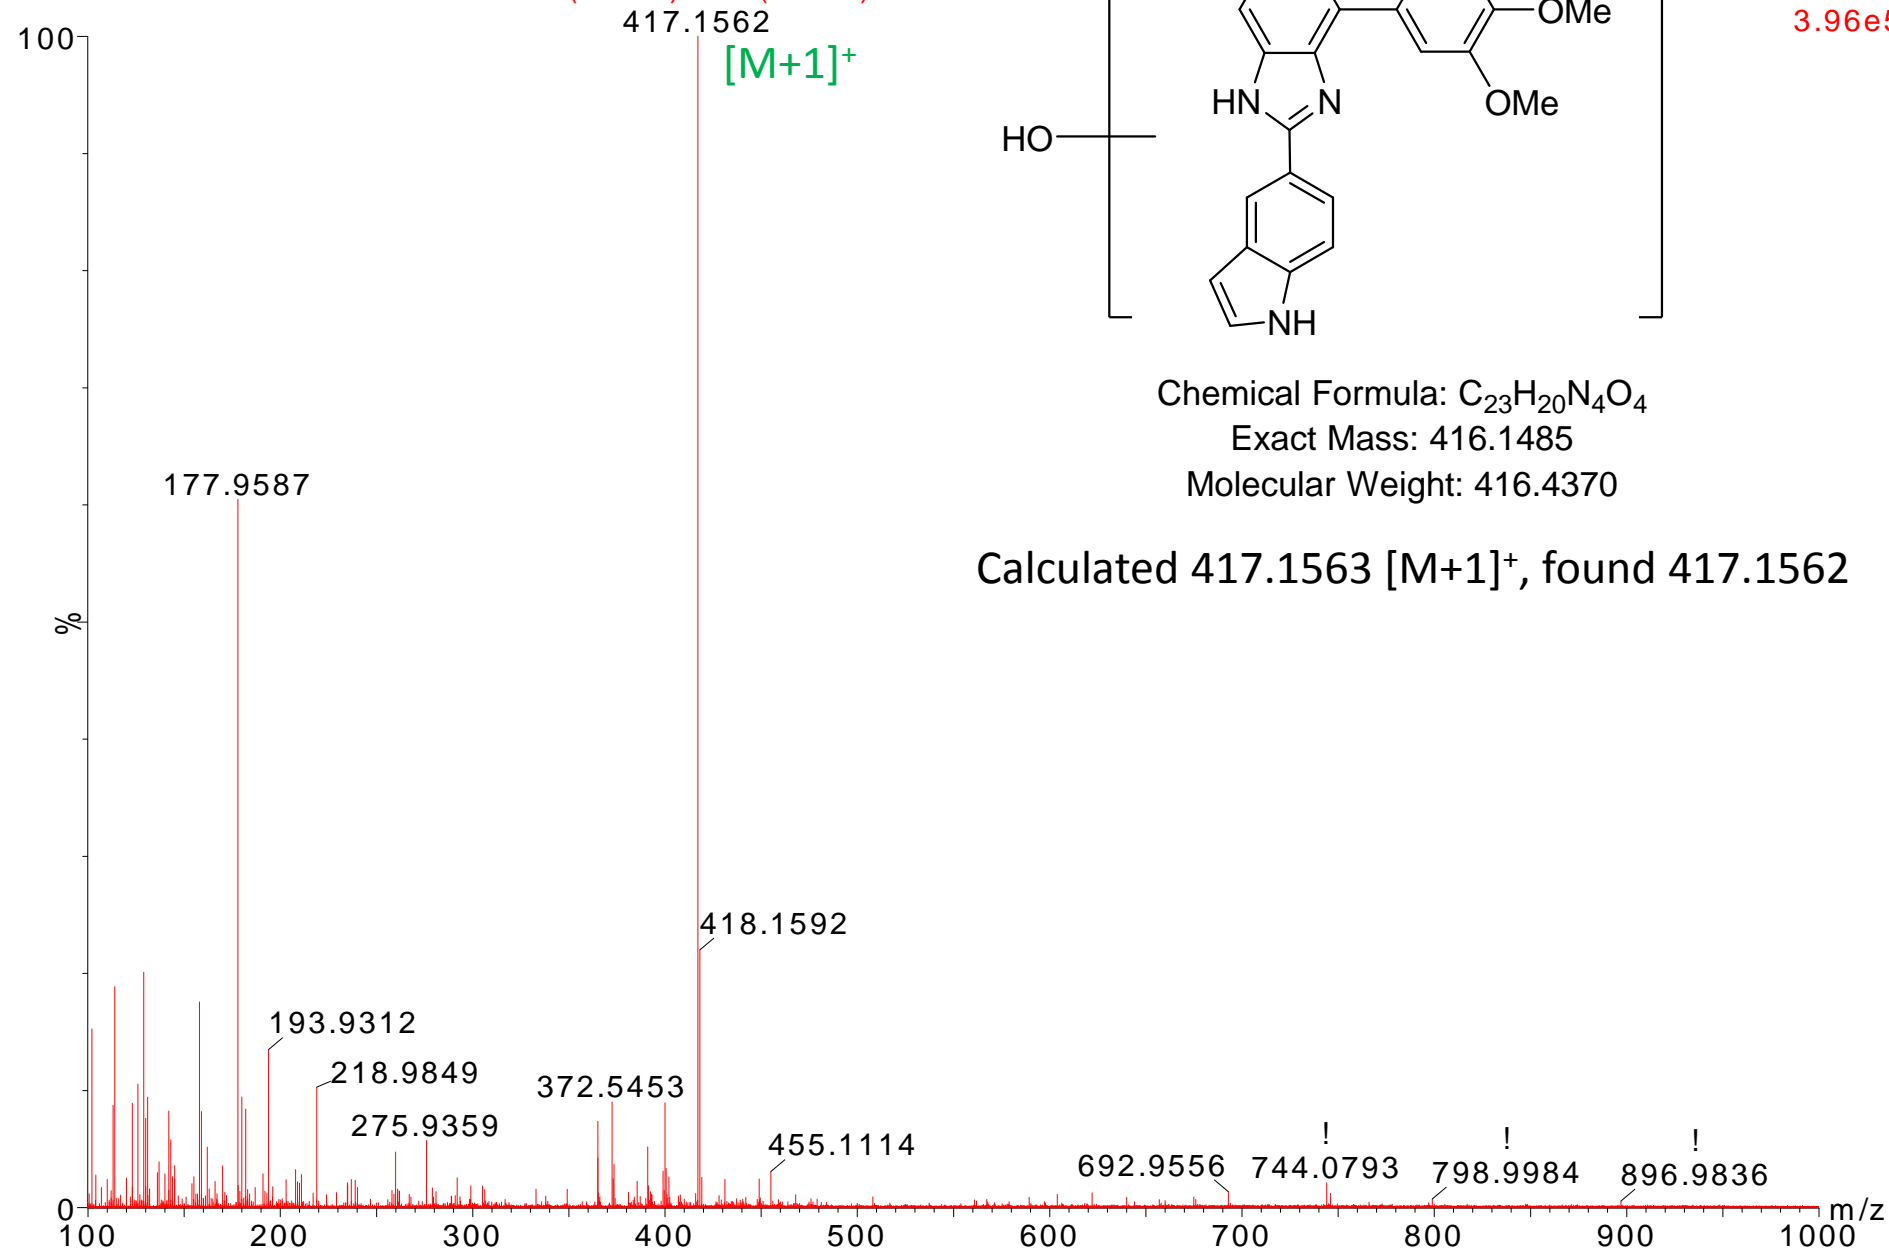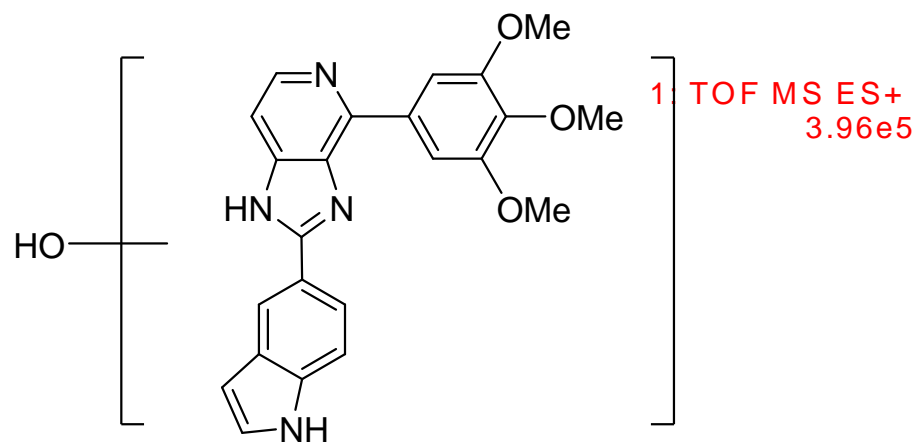

Chemical Formula: C<sub>23</sub>H<sub>20</sub>N<sub>4</sub>O<sub>4</sub>

Exact Mass: 416.1485

Molecular Weight: 416.4370

Calculated 417.1563 [M+1]<sup>+</sup>, found 417.1562

# Chromatogram of M14 (extracted at 417.1563)

treated

LY-3-296-120 m in - Dec 3 - 2013 - 3

1: TOF MS ES+  
417.156 0.0100 Da  
3.28 e5

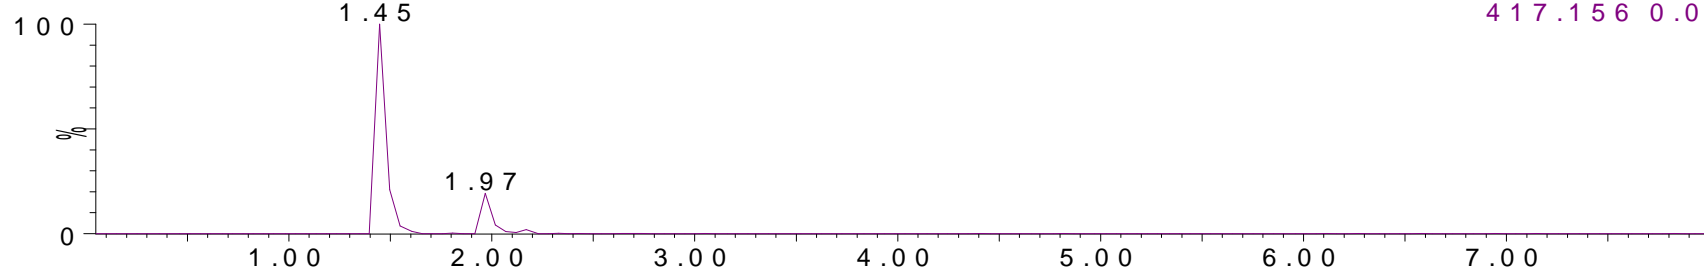

LY-3-296-60 m in - Dec 3 - 2013 - 3

1: TOF MS ES+  
417.156 0.0100 Da  
1.99 e5

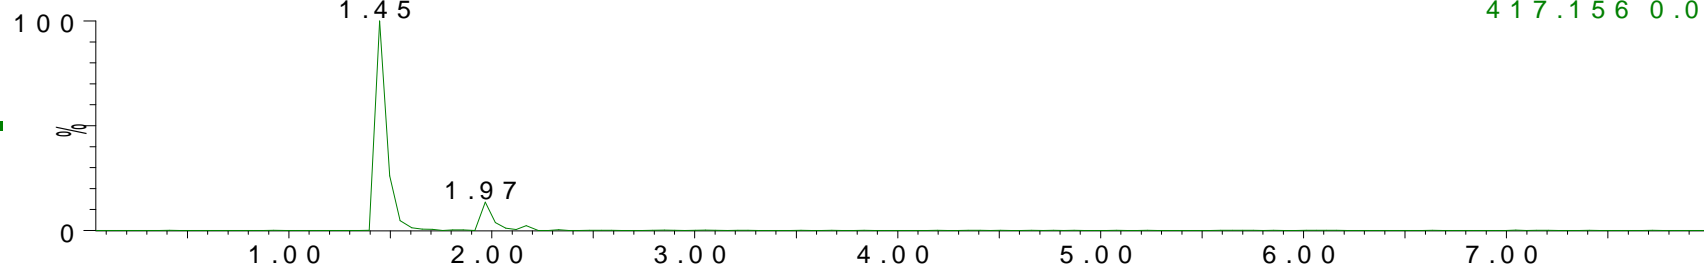

LY-3-296-30 m in - Dec 3 - 2013 - 3

1: TOF MS ES+  
417.156 0.0100 Da  
1.81 e5

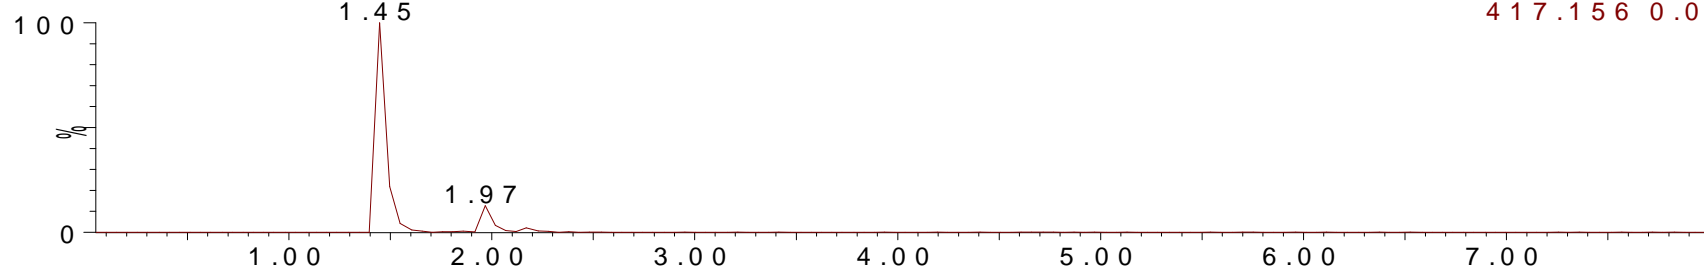

LY-3-296-0 m in - Dec 3 - 2013 - 3

1: TOF MS ES+  
417.156 0.0100 Da  
1.12 e3

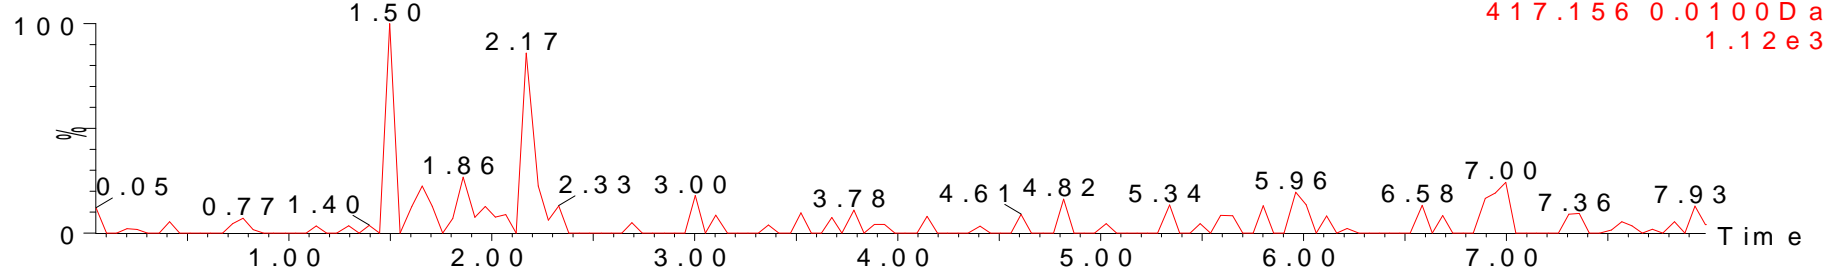

Supplement: jm500764v_si_001.pdf [file jm500764v_si_001.pdf]
